# Supplementary material for: Incidence and risk factors for falls among community-dwelling elderly subjects on a 1-year follow-up: a prospective cohort study from Ernakulam, Kerala, India
Source: PubMed Central journal article supplement — BMJ Open. 2020 Jul 30;10(7):e033691. doi: 10.1136/bmjopen-2019-033691 (PMC7394145; doi:10.1136/bmjopen-2019-033691), 2020-07-30
Supplement: bmjopen-2019-033691.draft_revisions.pdf [file bmjopen-2019-033691.draft_revisions.pdf]

# BMJ Open

BMJ Open is committed to open peer review. As part of this commitment we make the peer review history of every article we publish publicly available.

When an article is published we post the peer reviewers' comments and the authors' responses online. We also post the versions of the paper that were used during peer review. These are the versions that the peer review comments apply to.

The versions of the paper that follow are the versions that were submitted during the peer review process. They are not the versions of record or the final published versions. They should not be cited or distributed as the published version of this manuscript.

BMJ Open is an open access journal and the full, final, typeset and author-corrected version of record of the manuscript is available on our site with no access controls, subscription charges or pay-per-view fees (<http://bmjopen.bmj.com>).

If you have any questions on BMJ Open's open peer review process please email [info.bmjopen@bmj.com](mailto:info.bmjopen@bmj.com)

# BMJ Open

## Incidence and risk factors for falls among community dwelling elderly subjects - A prospective cohort study from Ernakulam, Kerala, India

|                               |                                                                                                                                                                                                                                                                                                                                                                                                                                                                                                                                                                         |
|-------------------------------|-------------------------------------------------------------------------------------------------------------------------------------------------------------------------------------------------------------------------------------------------------------------------------------------------------------------------------------------------------------------------------------------------------------------------------------------------------------------------------------------------------------------------------------------------------------------------|
| Journal:                      | <i>BMJ Open</i>                                                                                                                                                                                                                                                                                                                                                                                                                                                                                                                                                         |
| Manuscript ID                 | bmjopen-2019-033691                                                                                                                                                                                                                                                                                                                                                                                                                                                                                                                                                     |
| Article Type:                 | Original research                                                                                                                                                                                                                                                                                                                                                                                                                                                                                                                                                       |
| Date Submitted by the Author: | 02-Sep-2019                                                                                                                                                                                                                                                                                                                                                                                                                                                                                                                                                             |
| Complete List of Authors:     | Sasidharan, Divyamol; Sub District Hospital, Geriatric Medicine; SHO/INHS Jeevanti<br>Vijayakumar, Priya; Amrita Vishwa Vidyapeetham, Geriatric Medicine<br>Raj, Manu; Amrita Institute of Medical Sciences and Research Centre, pediatrics & pediatric cardiology<br>Soman, Sumi ; Amrita Vishwa Vidyapeetham, Public Health Research<br>Antony, Libin; Amrita Vishwa Vidyapeetham, Public Health Research<br>Sudhakar, Abhish; Amrita Institute of Medical Sciences and Research Centre, pediatrics & pediatric cardiology<br>Kabali, Conrad; Health Quality Ontario, |
| Keywords:                     | Falls, Elderly, Community based study, Cohort Study, Kerala                                                                                                                                                                                                                                                                                                                                                                                                                                                                                                             |
|                               |                                                                                                                                                                                                                                                                                                                                                                                                                                                                                                                                                                         |

SCHOLARONE™  
Manuscripts

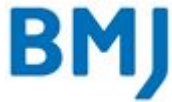

I, the Submitting Author has the right to grant and does grant on behalf of all authors of the Work (as defined in the below author licence), an exclusive licence and/or a non-exclusive licence for contributions from authors who are: i) UK Crown employees; ii) where BMJ has agreed a CC-BY licence shall apply, and/or iii) in accordance with the terms applicable for US Federal Government officers or employees acting as part of their official duties; on a worldwide, perpetual, irrevocable, royalty-free basis to BMJ Publishing Group Ltd ("BMJ") its licensees and where the relevant Journal is co-owned by BMJ to the co-owners of the Journal, to publish the Work in this journal and any other BMJ products and to exploit all rights, as set out in our [licence](#).

The Submitting Author accepts and understands that any supply made under these terms is made by BMJ to the Submitting Author unless you are acting as an employee on behalf of your employer or a postgraduate student of an affiliated institution which is paying any applicable article publishing charge ("APC") for Open Access articles. Where the Submitting Author wishes to make the Work available on an Open Access basis (and intends to pay the relevant APC), the terms of reuse of such Open Access shall be governed by a Creative Commons licence – details of these licences and which [Creative Commons](#) licence will apply to this Work are set out in our licence referred to above.

Other than as permitted in any relevant BMJ Author's Self Archiving Policies, I confirm this Work has not been accepted for publication elsewhere, is not being considered for publication elsewhere and does not duplicate material already published. I confirm all authors consent to publication of this Work and authorise the granting of this licence.

**Type of article:** Original

**Title of the article:** Incidence and risk factors for falls among community dwelling elderly subjects - A prospective cohort study from Ernakulam, Kerala, India

**Running title :** Risk factors for falls among community dwelling elderly subjects in Kerala

**Contributors**

1. Divyamol K Sasidharan, MD (Geriatric Medicine), jisbbb87@gmail.com
2. Priya Vijayakumar, MD (General Medicine), divz64@gmail.com
3. Manu Raj, DNB (Pediatric Cardiology), drmanuraj@gmail.com
4. Sumi Soman, MSc Nursing, [sumisoman90@gmail.com](mailto:sumisoman90@gmail.com)
5. Libin Antony P F, Msc Nursing, libinantony.antony@gmail.com
6. Abhish Sudhakar, MA Sociology, abishsudhakar@aims.amrita.edu
7. Conrad Kabali, PhD Biostatistics, ckabali@gmail.com

**Department(s) and institution(s):** Department of Geriatric Medicine, Amrita Vishwa Vidyapeetham

**Corresponding Author:**

Name : Priya Vijayakumar  
Address : Clinical Professor  
Department of Geriatric Medicine  
Amrita Institute of Medical Sciences, Kochi  
Phone numbers : 9995653009  
E-mail address : divz64@gmail.com

Total number of pages: 18

Total number of photographs: Nil

Word counts

for abstract: 268

1  
2  
3  
4 for the text: 3099

5 Source(s) of support: Nil

6  
7 Presentation at a meeting: Nil

8  
9  
10  
11 Conflicting Interest: Nil

12  
13  
14  
15 Acknowledgement: We are thankful for the valuable inputs provided by Dr.Sunil K S,  
16 Mrs.Ramya Raju, Mrs.Georgina P, Dr.Jishnu S Lalu during planning, data collection  
17 and analysis stage.  
18  
19  
20  
21  
22  
23  
24  
25  
26  
27  
28  
29  
30  
31  
32  
33  
34  
35  
36  
37  
38  
39  
40  
41  
42  
43  
44  
45  
46  
47  
48  
49  
50  
51  
52  
53  
54  
55  
56  
57  
58  
59  
60

For peer review only

**Contributor ship statement (to be ticked marked as applicable):**

|                                       | Contributor<br>1 | Contributor<br>2 | Contributor<br>3 | Contributor<br>4 | Contributor<br>5 | Contributor<br>6 |
|---------------------------------------|------------------|------------------|------------------|------------------|------------------|------------------|
| Concepts                              | √                | √                | √                |                  |                  |                  |
| Design                                | √                | √                | √                |                  |                  | √                |
| Definition of intellectual<br>content | √                | √                | √                |                  |                  | √                |
| Literature search                     | √                |                  | √                |                  |                  |                  |
| Clinical studies                      | √                |                  | √                |                  |                  |                  |
| Experimental studies                  | √                |                  | √                |                  |                  |                  |
| Data acquisition                      | √                |                  |                  | √                |                  |                  |
| Data analysis                         | √                |                  | √                | √                | √                |                  |
| Statistical analysis                  | √                |                  | √                | √                | √                | √                |
| Manuscript preparation                | √                |                  | √                |                  |                  |                  |
| Manuscript editing                    | √                | √                | √                |                  |                  |                  |
| Manuscript review                     | √                | √                | √                |                  |                  |                  |
| Guarantor                             | √                | √                | √                |                  |                  |                  |

**Title:****Incidence and risk factors for falls among community dwelling elderly subjects - A prospective cohort study from Ernakulam, Kerala, India****Abstract*****Background & Objectives:***

***Purpose:*** There is limited knowledge regarding epidemiology and risk of falls in elderly living in low and middle income countries. The primary objective was to report the incidence of falls in community dwelling elderly population aged 65 years and above from Ernakulam, Kerala, India.

***Methods:*** The study was a prospective cohort with stratified random cluster sampling. We collected information via house visits using a questionnaire. The subjects were followed up prospectively for 12 months by phone at 90 day intervals and missing subjects by house visits.

**Participants:** Community dwelling elderly above 65years of age.

***Findings:*** We recruited a total of 1000 participants. A total of 201(20.1%) subjects reported a fall during follow-up. The incidence rate of falls was 31 (95% CI 27.7, 34.6) per 100 follow-up years. Female sex (OR 1.48, 95% CI 1.05, 2.10,  $p = 0.027$ ), movement disorders including parkinsonism (OR 2.26, 95% CI, 1.00, 5.05,  $p=0.048$ ), arthritis (OR 1.48, 95% CI 1.05, 2.09,  $p=0.026$ ), dependence in basic activities of daily living (OR, 3.49, 95% CI 2.00, 6.09,  $p<0.001$ ), not using antihypertensive medications (OR, 1.53, 95% CI 1.10, 2.13,  $p=0.012$ ), living alone during daytime (OR 3.27, 95% CI 1.59, 6.71,  $p=0.001$ ) and a history of falls in the previous year (OR, 2.25, 95% CI 1.60, 3.15,  $p<0.001$ ) predicted a fall in the following year.

***Interpretation & Conclusions:*** One in five community dwelling elderly fall annually and one in four who fall are prone to fall again in the next year. Interventions targeting falls among elderly need to focus on modifiable risk factors like living alone during daytime, movement disorders, arthritis and dependence on basic activities of daily living.

**Keywords: Falls, Elderly, Community based study, Cohort Study, Kerala**

### ***Strengths and limitations of this study***

The strengths of the current study include a prospective cohort study design, large sample size (n=1000), representative urban and rural population components, inclusion of participants from different SES levels, no participants lost to follow up and use of a fall diary to avoid recall bias. The limitations include data from a single study site and a short period of follow up (one year).

### **Introduction**

Globally, there are an estimated 962 million people aged 60 or over, comprising 13 per cent of the total population.<sup>1</sup> This geriatric population is expected to double by 2050 to 2.1 billion.<sup>1</sup> Unintentional injuries are reported to be the fifth leading cause of death globally in this population and falls constitute two out of every three deaths in this category.<sup>2</sup> The Kellogg International Working Group that was constituted to focus on the prevention of elderly falls defined a fall as 'unintentionally coming to the ground or some lower level and other than as a consequence of sustaining a violent blow, loss of consciousness, sudden onset of paralysis as in stroke or an epileptic seizure'.<sup>3</sup>

Many prospective population-based studies have examined the epidemiology of falls in the community dwelling elderly across different settings. The reported incidence rates show wide variability from as low as 29% to as high as 40% in this population.<sup>4-9</sup> Various studies done in India have reported the prevalence of falls in community dwelling elderly ranging from 13-53%.<sup>10-13</sup> The incidence of recurrent falls (more than two episodes per calendar year) was reported to be 11 to 21% by Lord et al.<sup>4</sup>

The risk factors for falls in the elderly as reported by Lord et al can be grouped into seven major categories.<sup>4</sup> These include socio-demographic factors, balance and mobility factors, sensory and neuromuscular factors, psychological factors, medical factors, medication use, and environmental factors.<sup>4</sup> A recent meta-analysis by Deandrea et al pooled data from 74 prospective cohort studies that reported risk factors for prospective falls among community dwelling elders.<sup>14</sup> A prior history of falls, gait problems, walking aid use, vertigo, Parkinson



1  
2  
3 disease and anti-epileptic drug use were the dominant reasons for prospective falls in this age  
4 group.<sup>14</sup>  
5  
6

7 The primary objective of our study was to report the incidence of falls in community  
8 dwelling elderly population from Ernakulam, Kerala, India through a year-long prospective  
9 follow up schedule. The secondary objective was to identify factors that can predict a risk for  
10 future fall in community dwelling elders.  
11  
12  
13  
14  
15  
16  
17  
18  
19

## 20 **Methods:**

### 21 *Selection and Description of participants:*

22  
23 **Design & Setting:** The current study is a community based prospective cohort study that was  
24 conducted in an area within 10 km radius from the study centre (Amrita Institute of Medical  
25 Sciences and Research Centre, Kochi, Kerala). The study was conducted over a period of 3  
26 years (Nov 2014 to Nov 2017). This circular area included 12 panchayats, 4 municipalities  
27 and 1 corporation. The study area comes under Ernakulam district of Kerala, South India.  
28  
29  
30  
31  
32  
33

34 We calculated the sample size using a previously published study by Mitchell-Fearson et al  
35 which reported a 21.7% prevalence for falls in the elderly.<sup>15</sup> We selected an alpha of 0.05 and  
36 an allowable error of 20% giving us a minimum sample size of 347 subjects. The design  
37 effect for the sampling method (multistage stratified random cluster sampling) was calculated  
38 using a pilot of ten clusters (cluster size k=25) that provided an Intra Class Correlation (ICC)  
39 of 0.023. The sample size adjusted for design effect was 539 (inflation factor of 1.552). We  
40 enrolled a total of 1000 participants anticipating significant sub group differences within the  
41 study sample.  
42  
43  
44  
45  
46  
47  
48

49 **Participants:** We used stratified random cluster sampling method to select the participants.  
50 The sample was stratified at two levels, rural urban (level 1) and at the level of individual  
51 local self-governing units (LSGs, level 2). A total of 40 clusters using Probability  
52 proportional to size technique were selected randomly from the list of all available clusters  
53 within the defined geographical area. Each cluster was from an individual electoral ward  
54 within the LSGs. We selected 25 participants from each cluster. In each cluster, a random  
55  
56  
57  
58  
59  
60

1  
2  
3 starting point was selected and households were visited in a sequential manner by the  
4 principal investigator and staff till 25 subjects were recruited. A flowchart on the study  
5 design used in the present study is shown in figure.1. The inclusion criteria included (i)  
6 minimum age of 65 years or more (ii) ambulant physical status (iii) intention to stay in the  
7 study area of a minimum of 12 months after assessment and (iv) comprehensive skills in  
8 English/Malayalam language. The exclusion criteria included complete dependence for day  
9 to day activities.  
10  
11  
12  
13  
14

15  
16 **Patient and public involvement:** Patients and the public were not specifically involved in  
17 the planning and execution of this study. However, they were informed of the need of the  
18 study and quarterly follow up was done telephonically.  
19  
20  
21

### 22 ***Technical Information and Interventions:***

23  
24 A study questionnaire was prepared after a detailed literature review of studies related to falls  
25 in the elderly. The study questionnaire included questions relating to the socio-demographic  
26 profile, comorbidities, physical activity, medication use and environmental assessment. This  
27 questionnaire was initially piloted over a small number of patients (n=50) and redundant  
28 questions were either removed or modified. The modified questionnaire was reviewed by  
29 subject experts and was approved for use in the full study.  
30  
31  
32  
33  
34

35  
36 All initial assessments were done at the participant's home. The research team (PI, two  
37 nurses) visited all recruited subjects at their home premises. The study questionnaire was  
38 administered by the PI by means of a face to face interview during house visits. In addition,  
39 height, weight and blood pressure readings were taken by the trained staff (nurses) that  
40 accompanied the PI. All subjects were advised to keep a diary in which they should note  
41 down and incidence of fall along with the date and time of fall, what the patient was doing  
42 when he fell, what caused the fall, whether it was witnessed fall or not and whether the fall  
43 had any consequences or complications. Three monthly follow up was done by telephonic  
44 conversation with enrolled subjects. Those who were not available over the phone were  
45 revisited via house visits. The data collection period was from August 2015 to April 2017.  
46  
47  
48  
49  
50  
51  
52  
53

### 54 ***Statistics:***

55  
56 We summarized demographic and social-economic variables to characterize the study  
57 population (Table 1). We presented the mean and standard deviation for normally distributed  
58  
59  
60

1  
2  
3 continuous variables. Values are expressed in number and percentages. We used Chi square  
4 test to examine the association of categorical risk factors with prospective falls. All individual  
5 factors with a p value of <0.2 for association on bivariate analysis was selected for  
6 multivariate analysis. Multiple binary logistic regression was used to construct the prediction  
7 model for prospective falls. The cut-off point for statistical significance was set at an  $\alpha$ -level  
8 of 5%. We reported the adjusted Odds Ratios (aOR) with 95% confidence intervals.  
9  
10 Statistical analysis was done using IBM SPSS Statistics 20 Windows (SPSS Inc., Chicago,  
11 USA).

### 17 ***Ethical approval:***

18  
19  
20 We collected written informed consent from the consenting subjects before recruitment to the  
21 study and the same was documented for future reference. The consent contained the title,  
22 purpose, methods employed in the study, benefits to the subject as well as family and the  
23 interest of the respondent to participate on a voluntary basis to the study. The confidentiality  
24 of the study during the analysis was also mentioned in the consent. The consent process and  
25 study protocol was approved by the Institutional Ethics Committee (Institutional Ethics  
26 Committee Registration Number: ECR/129/Inst/KL/2013).

## 33 **Results**

### 34 ***Baseline Characteristics of the study population***

35  
36 We recruited a total of 1000 participants from 40 individual pre-designated clusters spread  
37 across a circular geographical area with the study institution as the centre point. The  
38 distribution of gender, age categories, weight status, education level, household living pattern  
39 and area of domicile are presented in Table 1. The mean age of the study subjects was  
40 72.7(7.2) years. Among study participants, 568 (56.8%) were female, 87.4% were literate  
41 and 82% lived with family or caretakers. A total of 348 (34.8%) were either pre-obese or  
42 obese as per Asian Criteria of BMI classification.<sup>16</sup> The morbidity profile of the study  
43 population was published earlier.<sup>17</sup> The self-reported prevalence of diabetes(DM), coronary  
44 artery diseases(CAD) and cerebrovascular accidents (CVA) were 34.2%, 20.1%&5.3%  
45 respectively. Among study subjects, 768 (76.8%) were hypertensive as documented either by  
46 high values on house visit measurement or by current treatment for hypertension. Among  
47 hypertensives, a total of 528 subjects (68.8%) reported taking treatment for hypertension and  
48 remaining 240(31.2%) were newly detected during the baseline evaluation of the study.  
49  
50  
51  
52  
53  
54  
55  
56  
57  
58  
59  
60

### ***Incidence of falls in the study population***

A total of 201(20.1%) subjects reported a fall during the prospective follow up period of 12 months. The total fall episodes during the follow up period were 301. The overall incidence rate of falls was 31 (95% CI 27.7, 34.6) per 100 follow up years. The corresponding figures for elderly men and women separately were 21.2 (95% CI 18.5, 24.2) & 38.3 (95% CI, 34.6, 42.3) respectively. The stratified incidence rates for age groups 65-75, 75-85 & more than 85 were 27.4, 36.8 and 41.1 per 100 follow up years respectively. Among participants, more women reported a fall compared to men (23.6% v/s 15.5%, p, 0.002). In the age stratified groups, 27(30.0%) subjects in the age group >85 years reported a fall in the follow up period, compared to 54(20.6%) in the age group 75-85 years and 120(18.5%) in the 65-75 years group. (p 0.038). In addition, 53 (5.3 %) people sustained recurrent falls (two or more falls) during the follow up.

### ***Factors associated with prospective falls.***

The association of baseline factors with a prospective history of falls during the follow up period is presented in **Table 2** as unadjusted bivariate comparisons. Among all baseline variables, only gender and living arrangement showed a significant association with a prospective history of falls on bivariate comparisons. Females had a higher risk of fall when compared to males (OR 1.68, 95% CI, 1.21, 2.33. p 0.002). Those living alone during daytime also had a higher risk of falls when compared to those living with family/caretaker (OR 2.95, 95% CI, 1.47, 5.94. p 0.002). The association of prospective falls with factors affecting locomotion was explored by bivariate analysis and is presented in **Table 3**. Among the factors affecting locomotion, only parkinsonism (OR 2.66, 95% CI, 1.23, 5.78. p 0.010), vertigo (OR 1.51, 95% CI, 1.10, 2.06. p 0.010), arthritis (OR 1.62, 95% CI, 1.17, 2.25. p 0.004), numbness and paraesthesia of feet (OR 1.37, 95% CI, 1.00, 1.86. p 0.048) dependence in basic activities of daily living (OR 3.45, 95% CI, 2.01, 5.92. p <0.001) and dependence in instrumental activities of daily living (OR 1.63, 95% CI, 1.18, 2.25. p 0.003) showed significant associations with prospective falls on bivariate comparisons. A history of falls in the preceding year also had a higher risk for prospective falls (OR 2.59, 95% CI, 1.87, 3.58. p <0.001).

Among baseline factors only gender showed an association with recurrent falls on bivariate comparisons (OR 2.44, 95% CI, 1.29, 4.63. p 0.005). Among factors affecting locomotion

1  
2  
3 dependence in basic activities of daily living (OR 5.00, 95% CI, 2.38, 10.10.  $p < 0.001$ ),  
4 dependence in instrumental activities of daily living (OR 1.79, 95% CI, 1.03, 3.12.  $p = 0.038$ )  
5 and a history of falls in the preceding year (OR 4.20, 95% CI, 2.38, 7.39  $p < 0.001$ ) showed an  
6 association with recurrent falls on bivariate comparisons.  
7  
8  
9

10  
11 In the study population, 474(47.4%) subjects reported taking anti-hypertensives, 277(27.7%)  
12 reported taking anti diabetic medications and 69(6.9%) reported taking either  
13 benzodiazepines or other sedative drugs. There was no significant association for prospective  
14 falls with use of anti-hypertensive medications (OR 0.77, 95% CI 0.57, 1.06,  $p = 0.104$ ), anti-  
15 diabetic medications (OR 1.14, 95% CI 0.81, 1.60,  $p = 0.446$ ) or benzodiazepines/sedatives  
16 (OR 1.56, 95% CI 0.90, 2.72,  $p = 0.110$ ) in bivariate comparisons.  
17  
18  
19  
20  
21  
22

### 23 ***Independent Risk Factors for prospective falls***

24  
25 The final adjusted model with independent predictors of prospective falls in the elderly is  
26 presented as Table 4. Among the factors examined in the logistic regression model, female  
27 sex (OR 1.48, 95% CI 1.05, 2.10,  $p = 0.027$ ), parkinsonism (OR 2.26, 95% CI 1.00, 5.05,  
28  $p = 0.048$ ), arthritis (OR 1.48, 95% CI 1.05-2.09,  $p = 0.026$ ), dependence in basic activities of  
29 daily living (OR 3.49, 95% CI 2.00, 6.09,  $p < 0.001$ ), not using antihypertensive medications  
30 (OR 1.53, 95% CI 1.10-2.13,  $p = 0.012$ ), living alone during the daytime (OR 3.27, 95% CI  
31 1.59-6.71,  $p = 0.001$ ) and history of falls in the previous year (OR 2.59, 95% CI 1.87, 3.58,  
32  $p < 0.001$ ) were found to be significantly associated with falls. The independent predictors for  
33 recurrent falls were female sex (OR 2.05, 95% CI 1.07, 3.95,  $p = 0.031$ ), dependence in basic  
34 activities of daily living (OR 3.63, 95% CI 1.71, 7.70,  $p = 0.001$ ), and history of falls in the  
35 previous year (OR 3.39, 95% CI 1.89, 6.05,  $p < 0.001$ ).  
36  
37  
38  
39  
40  
41  
42  
43  
44

### 45 **Discussion**

46  
47 This community based prospective cohort study provides details of 301 fall episodes  
48 experienced by 201 elderly subjects during a follow up period of one year from Ernakulam,  
49 Kerala, India. Approximately one in five elderly subjects in this age group reported a fall  
50 during the study period. There appears to be a sex based difference in the proportion that fell  
51 with one in four elderly women falling compared to one in six men during follow up. The  
52 results also suggest a dose response relationship between age and falls with more subjects  
53 falling in older age groups compared to relatively younger groups. In addition, every fourth  
54  
55  
56  
57  
58  
59  
60

1  
2  
3 person who fell reported one or more falls following the index fall episode during the study  
4 period. The independent predictors for falls in the elderly included female sex, parkinsonism  
5 and related movement disorders, arthritis, dependence in basic activities of daily living, not  
6 using antihypertensive medicines, living alone during daytime and a history of fall in the  
7 preceding year. The corresponding predictors for recurrent falls included female sex,  
8 dependence in basic activities of daily living and a history of fall in the preceding year. To  
9 our knowledge, this is the only prospective cohort study done in India that focussed on falls  
10 in free living elderly who were assessed in the community setting.

11  
12 The incidence of falls in the elderly from our study appears to be at the lower end of the  
13 spectrum as reported by western studies (29% to 40%).<sup>4-9</sup> Interestingly, our results are more  
14 similar to that reported by a prospective study among community dwelling elderly Chinese  
15 subjects.<sup>18</sup> The incidence rate of falls in this study were 27.0, 32.4 and 22.0 per 100 person-  
16 years for all elderly, women and men respectively. The proportion with recurrent falls in this  
17 study was also similar to our study (4.75% v/s 5.3%).

18  
19 The risk factors for prospective falls in community dwelling elderly was examined by a  
20 recent meta-analysis by Deandrea et al that pooled 74 prospective cohorts.<sup>14</sup> Most of the  
21 prospective studies in the meta-analysis suggested that community dwelling elderly women  
22 are at higher risk for falls compared to their male counterparts. The pooled estimates for falls  
23 (OR 1.30, 95% CI, 1.18, 1.42) and recurrent falls (OR 1.34, 95% CI, 1.12, 1.60) in this meta-  
24 analysis are in agreement with the current study.

25  
26 Several prospective studies have reported higher risk for falls among elderly patients with  
27 Parkinsonism and/or related movement disorders similar to the current study. The meta-  
28 analysis suggested an adjusted OR of 2.71 (95% CI, 1.08, 6.84) for falls and 2.84 (95% CI,  
29 1.77, 4.58) for recurrent falls from five studies that looked for the same. Our study didn't  
30 report any positive association between Parkinson's disease and recurrent falls, probably due  
31 to the small number of recurrent fallers (5.3%) in the cohort.

32  
33 Our finding of high risk for falls among those elderly with arthritis is in concordance with  
34 several other studies.<sup>19-22</sup> Together these studies suggest that elderly with arthritis and/or  
35 chronic pain have a higher risk for falls. The GLOW cohort also reported a higher incidence  
36 of falls and fractures in postmenopausal women with osteoarthritis compared to osteoarthritis  
37 free peers.<sup>22</sup>

1  
2  
3  
4  
5  
6 Several studies have reported that living alone during the daytime is a risk factor for falls in  
7 the elderly as suggested by the current study.<sup>14</sup> The meta-analysis is also in agreement with  
8 this observation (OR 1.33, 95% CI, 1.21, 1.45) after looking at data from 11 studies that  
9 examined the same.  
10  
11

12  
13 Reduced BADL( Basic Activities of Daily Living) capability is also reported to be associated  
14 with falls in the elderly.<sup>23</sup> Yokoya et al recently concluded that higher frequency of leaving  
15 home, higher exercise levels and presence of interest in activities (e.g., meeting friends,  
16 shopping, working in the garden) were associated with a reduced risk for fall in community  
17 dwelling elders.<sup>23</sup> Maintaining and enhancing physical functions, principally walking ability  
18 and walking speed are critical for fall prevention among elderly.<sup>24,25</sup> Age appropriate  
19 exercises including those enhancing muscle strength and improving balance can probably  
20 reduce the incidence of falls among elderly.<sup>25</sup>  
21  
22

23  
24 A history of falls in the previous year appears to be the most consistent risk factor across  
25 several studies.<sup>14,25,26</sup> Pooled data from several studies in the recent meta-analysis puts the  
26 risk at an OR of 2.77 (95% CI, 2.37, 3.25) for falls and an OR of 3.46 (95%CI, 2.85, 4.22) for  
27 recurrent falls, in agreement with the current study (2.59 & 3.39 respectively).<sup>14</sup> Suzuki et al  
28 reported that five out of six elderly with a history of falls were anxious about another fall and  
29 one in three said that they did not venture out again due to fear of another fall.<sup>25</sup>  
30  
31

32  
33 One notable finding in our study was the lack of association for falls with medication use for  
34 most groups of medications except for antihypertensive medications. This is in contrast to a  
35 meta-analysis of the impact of medication classes on falls in elderly.<sup>27</sup> Woolcott et al reported  
36 an OR of 1.41 (95% CrI, 1.20-1.71) for falls among elderly with benzodiazepine use.<sup>27</sup> The  
37 lack of association between sedatives use and falls in our study is probably due to the limited  
38 number of subjects reporting the use of the same (6.9%). We saw an inverse association  
39 between falls and the use of antihypertensive drug use in the current study. One probable  
40 reason could be the high proportion of uncontrolled hypertensives in the study population.  
41 This finding needs to be explored further in future studies.  
42  
43  
44  
45  
46  
47  
48  
49  
50  
51  
52  
53  
54  
55  
56  
57

58 ***Funding:***  
59  
60

This research received no specific grant from any funding agency in the public, commercial or not-for-profit sectors.

## Conclusion

One in five community dwelling elderly citizens fall on an annual basis and one in four of those who fall are prone to fall again in the same calendar year. Female sex, movement disorders including parkinsonism, arthritis, dependence in basic activities of daily living, living alone during daytime and a history of falls in the previous year appear to predict a fall in the following year. Any intervention targeting a reduction in falls among the elderly need to focus on the modifiable risk factors like living alone at home during daytime, movement disorders and arthritis. We need to encourage mechanisms that may reduce dependence of elderly on basic activities of daily living. Attention should also be given to encourage both physical activity and interests in social activities among elderly subjects.

**Competing Interests:** Authors have no competing interests.

**Funding:** No financial support from external sources was received for this study.

## References:

1. United Nations, Department of Economic and Social Affairs, Population Division (2017). World Population Prospects: The 2017 Revision, Key Findings and Advance Tables. Working Paper No. ESA/P/WP/248., n.d.
2. Rubenstein LZ. Falls in older people: epidemiology, risk factors and strategies for prevention. *Age Ageing*. 2006 Sep;35 Suppl 2:ii37-ii41.
3. Gibson MJ, Andres RO, Isaacs B, Radebaugh T, Worm-Petersen J. The prevention of falls in later life. A report of the Kellogg International Work Group on the prevention of falls by the elderly. *Danish Medical Bulletin* 1987;34(Suppl 4):1-24.
4. Lord SR, Sherrington C, Menz HB. Falls in Older People: Risk Factors and Strategies for Prevention. 2nd ed. Cambridge, MA: Cambridge University Press; 2007.
5. Tinetti ME, Speechley M, Ginter SF. Risk factors for falls among elderly persons living in the community. *N Engl J Med*. 1988 Dec 29;319(26):1701-7.
6. O'Loughlin JL, Robitaille Y, Boivin JF, Suissa S. Incidence of and risk factors for falls and injurious falls among the community-dwelling elderly. *Am J Epidemiol*. 1993 Feb 1;137(3):342-54.
7. Lord SR, Ward JA, Williams P, Anstey KJ. An epidemiological study of falls in older community-dwelling women: the Randwick falls and fractures study. *Aust J Public Health*. 1993 Sep;17(3):240-5.
8. Campbell AJ, Borrie MJ, Spears GF. Risk factors for falls in a community-based prospective study of people 70 years and older. *J Gerontol*. 1989 Jul;44(4):M112-7.
9. Luukinen H, Koski K, Laippala P, Kivelä SL. Predictors for recurrent falls among the home-dwelling elderly. *Scand J Prim Health Care*. 1995 Dec;13(4):294-9.
10. Aniket Sirohi 1, Ravneet Kaur, Anil Kumar Goswami, Kalaivani Mani, Baridalyne Nongkynrih, Sanjeev Kumar Gupta, "A Study of Falls among Elderly Persons in a Rural Area of Haryana," *Indian Journal of Public Health* 61, no. 2 (2017): 99-104, [https://doi.org/10.4103/ijph.IJPH\\_102\\_16](https://doi.org/10.4103/ijph.IJPH_102_16).
11. Dr. B. Krishnaswamy, Dr. Gnanasambandam Usha, "FALLS IN OLDER PEOPLE NATIONAL / REGIONAL REVIEW INDIA," n.d., <http://www.who.int/ageing/projects/SEARO.pdf>.



- 1  
2  
3 12. Dr Anku Moni Saikia, Dr Ashok Kumar Das, Ms Anjana Moyee Saikia, "Prevalence and Correlates of Falls among  
4 Community-Dwelling Elderly of Guwahati City, Assam," *Indian Journal of Basic and Applied Medical Research*; 5, no. 2  
5 (March 2016): 185–90.
- 6 13. Pawan Kumar Sharma, Clare Bunker, Tushar Singh, Enakshi Ganguly, P sudhakar Reddy, Anne B Newman et al.,  
7 "Burden and Correlates of Falls among Rural Elders of South India: Mobility and Independent Living in Elders Study,"  
8 *Current Gerontology and Geriatrics Research* 2017 (2017): 1–8, <https://doi.org/10.1155/2017/1290936>.
- 9 14. Deandrea S, Lucenteforte E, Bravi F, Foschi R, La Vecchia C, Negri E. Risk factors for falls in community-dwelling  
10 older people: a systematic review and meta-analysis. *Epidemiology*. 2010 Sep;21(5):658-68.
- 11 15. Kathryn Mitchell-Fearon et al., "Falls Among Community-Dwelling Older Adults in Jamaica," *SAGE Open* 4, no. 4  
12 (December 18, 2014): 215824401456435, <https://doi.org/10.1177/2158244014564351>.
- 13 16. "Appropriate Body-Mass Index for Asian Populations and Its Implications for Policy and Intervention Strategies," *The*  
14 *Lancet* 363, no. 9403 (January 2004): 157–63, [https://doi.org/10.1016/S0140-6736\(03\)15268-3](https://doi.org/10.1016/S0140-6736(03)15268-3).
- 15 17. Divyamol K Sasidharan, Lalu J S, Vijayakumar P et al. "Morbidity Pattern Among The Geriatric Population In South  
16 India: An Observational Study," *Epidemiology International* 03, no. 01 (April 2, 2018): 11–17,  
17 <https://doi.org/10.24321/2455.7048.201803>
- 18 18. Chu LW, Chi I, Chiu AY. Incidence and predictors of falls in the Chinese elderly. *Ann Acad Med Singapore*. 2005  
19 Jan;34(1):60-72.
- 20 19. Suzanne G. Leveille, "Chronic Musculoskeletal Pain and the Occurrence of Falls in an Older Population," *JAMA* 302,  
21 no. 20 (November 25, 2009): 2214, <https://doi.org/10.1001/jama.2009.1738>.
- 22 20. Adam L. Doré et al., "Lower-Extremity Osteoarthritis and the Risk of Falls in a Community-Based Longitudinal Study  
23 of Adults with and without Osteoarthritis," *Arthritis Care & Research* 67, no. 5 (May 2015): 633–39,  
24 <https://doi.org/10.1002/acr.22499>.
- 25 21. Keith D. Hill et al., "Balance and Falls Risk in Women with Lower Limb Osteoarthritis or Rheumatoid Arthritis,"  
26 *Journal of Clinical Gerontology and Geriatrics* 4, no. 1 (March 2013): 22–28, <https://doi.org/10.1016/j.jcgg.2012.10.003>.
- 27 22. Daniel Prieto-Alhambra et al., "An Increased Rate of Falling Leads to a Rise in Fracture Risk in Postmenopausal Women  
28 with Self-Reported Osteoarthritis: A Prospective Multinational Cohort Study (GLOW)," *Annals of the Rheumatic Diseases*  
29 72, no. 6 (June 2013): 911–17, <https://doi.org/10.1136/annrheumdis-2012-201451>.
- 30 23. Yokoya T, Demura S, Sato S. Relationships between physical activity, ADL capability and fall risk in community-  
31 dwelling Japanese elderly population. *Environ Health Prev Med*. 2007 Jan;12(1):25-32.
- 32 24. Maki BE. Selection of perturbation parameters for identification of the posture-control system. *Med Biol Eng Comput*.  
33 1986 Nov;24(6):561-8.
- 34 25. Suzuki T. [Epidemiology and implications of falling among the elderly]. *Nihon Ronen Igakkai Zasshi*. 2003  
35 Mar;40(2):85-94. Review. Article in Japanese.
- 36 26. Nevitt MC, Cummings SR, Kidd S, Black D. Risk factors for recurrent nonsyncopal falls. A prospective study. *JAMA*.  
37 1989 May 12;261(18):2663-8.
- 38 27. Woolcott JC, Richardson KJ, Wiens MO, Patel B, Marin J, Khan KM, Marra CA. Meta-analysis of the impact of 9  
39 medication classes on falls in elderly persons. *Arch Intern Med*. 2009 Nov 23;169(21):1952-60.
- 40  
41  
42  
43  
44  
45  
46  
47  
48  
49  
50  
51  
52  
53

## Tables

**Table 1. Baseline Details of the study population.**

| Demographic factors | n (%) |
|---------------------|-------|
|---------------------|-------|

|                           |                                |            |
|---------------------------|--------------------------------|------------|
| <b>Gender</b>             | Male                           | 432(43.2)  |
|                           | Female                         | 568(56.8)  |
| <b>Age group</b>          | 65-75                          | 648(64.8)  |
|                           | 75-85                          | 262(26.2)  |
|                           | >85                            | 90(9.0)    |
| <b>Weight Status(BMI)</b> | Underweight(<18.5)             | 124(12.4)  |
|                           | Normal(18.5-22.9)              | 340(34.0)  |
|                           | Overweight(23-24.9)            | 188(18.8)  |
|                           | Pre Obese(25-29.9)             | 264(26.4)  |
|                           | Obese(>30)                     | 84(8.4)    |
| <b>Education</b>          | Graduate and above             | 132(13.2)  |
|                           | Diploma / Pre-degree           | 85(8.5)    |
|                           | Middle class / Primary         | 657(65.7)  |
|                           | Illiterate                     | 126(12.6)  |
| <b>House Hold</b>         | Living with family / caretaker | 820 (82.0) |
|                           | Living alone during daytime    | 145 (14.5) |
|                           | Living alone                   | 35 (3.5)   |
| <b>Domicile</b>           | Urban                          | 700(70.0)  |
|                           | Rural                          | 300(30.0)  |

**Table.2. Association of falls with baseline variables – bivariate comparisons**

| Risk factors | Prospective falls |      | OR (95% CI) | P value |
|--------------|-------------------|------|-------------|---------|
|              | No Fall           | Fall |             |         |
|              |                   |      |             |         |

|                                                | n(%) | n (%)     | n (%)     |                   |       |
|------------------------------------------------|------|-----------|-----------|-------------------|-------|
| <b>Gender</b>                                  |      |           |           |                   |       |
| Men <b>[432(43.2)]</b>                         |      | 365(84.5) | 67(15.5)  | 1.68(1.21-2.33)   | 0.002 |
| Women <b>[568(56.8)]</b>                       |      | 434(76.4) | 134(23.6) |                   |       |
| <b>Age Group in years</b>                      |      |           |           |                   |       |
| 65-75 <b>[648(64.8)]</b>                       |      | 528(81.5) | 120(18.5) |                   |       |
| 75-85 <b>[262(26.2)]</b>                       |      | 208(79.4) | 54(20.6)  | 1.14 (0.80-1.64)  | 0.468 |
| >85 <b>[90(9.0)]</b>                           |      | 63(70.0)  | 27(30.0)  | 1.89 (1.15 -3.09) | 0.012 |
| <b>Diabetes [342(34.2)]</b>                    |      |           |           |                   |       |
| No                                             |      | 532(80.9) | 126(19.1) | 1.19(0.86-1.63)   | 0.298 |
| Yes                                            |      | 267(78.1) | 75(21.9)  |                   |       |
| <b>Hypertension (768(76.8))</b>                |      |           |           |                   |       |
| No                                             |      | 181(78.0) | 51(22.0)  | 0.86(0.60-1.23)   | 0.414 |
| Yes                                            |      | 618(80.5) | 150(19.5) |                   |       |
| <b>Asthma or COPD (225(22.5))</b>              |      |           |           |                   |       |
| No                                             |      | 622(80.3) | 153(19.7) | 1.10(0.77-1.59)   | 0.600 |
| Yes                                            |      | 177(78.7) | 48(21.3)  |                   |       |
| <b>Coronary Artery Disease (201(20.1))</b>     |      |           |           |                   |       |
| No                                             |      | 639(80.0) | 160(20.0) | 1.02(0.69-1.50)   | 0.906 |
| Yes                                            |      | 160(79.6) | 41(20.4)  |                   |       |
| <b>Cerebrovascular Disease (53(5.3))</b>       |      |           |           |                   |       |
| No                                             |      | 762(80.5) | 185(19.5) | 1.78(0.97-3.27)   | 0.060 |
| Yes                                            |      | 37(69.8)  | 16(30.2)  |                   |       |
| <b>Alcohol (177(17.7))</b>                     |      |           |           |                   |       |
| No                                             |      | 654(79.5) | 169(20.5) | 0.85(0.56-1.30)   | 0.460 |
| Yes                                            |      | 145(81.9) | 32(18.1)  |                   |       |
| <b>Smoking (178(17.8))</b>                     |      |           |           |                   |       |
| No                                             |      | 652(79.3) | 170(20.7) | 0.81(0.53-1.23)   | 0.324 |
| Yes                                            |      | 147(82.6) | 31(17.4)  |                   |       |
| <b>Living Arrangement</b>                      |      |           |           |                   |       |
| Living with family/caretaker <b>(820(82))</b>  |      | 669(81.6) | 151(18.4) |                   |       |
| Living alone during daytime <b>(145(14.5))</b> |      | 109(75.2) | 36(24.8)  | 2.95(1.47-5.94)   | 0.002 |
| Living alone <b>(35(3.5))</b>                  |      | 21(60.0)  | 14(40.0)  | 1.46(0.97-2.22)   | 0.073 |

**Table 3. Association of falls with factors affecting locomotion – Bivariate comparisons**

| Risk factors | Prospective falls | OR (95% CI) | P value |
|--------------|-------------------|-------------|---------|
|--------------|-------------------|-------------|---------|

|                                                                                       |     | <b>No Fallers<br/>n (%)</b> | <b>Fallers<br/>n (%)</b> |                    |        |
|---------------------------------------------------------------------------------------|-----|-----------------------------|--------------------------|--------------------|--------|
| <b>Parkinsonism(28(2.8))</b>                                                          | No  | 782(80.5)                   | 190(19.5)                | 2.663(1.23-5.78)   | 0.010  |
|                                                                                       | Yes | 17(60.7)                    | 11(39.3)                 |                    |        |
| <b>Vertigo(388(38.8))</b>                                                             | No  | 505(82.5)                   | 107(17.5)                | 1.51(1.10-2.06)    | 0.010  |
|                                                                                       | Yes | 294(75.8)                   | 94(24.2)                 |                    |        |
| <b>Arthritis(281(28.1))</b>                                                           | No  | 591(82.2)                   | 128(17.8)                | 1.62(1.17-2.25)    | 0.004  |
|                                                                                       | Yes | 208(74.0)                   | 73(26.0)                 |                    |        |
| <b>Knee pain (565(56.5))</b>                                                          | No  | 356(81.8)                   | 79(18.2)                 | 1.24(0.91-1.70)    | 0.179  |
|                                                                                       | Yes | 443(78.4)                   | 122(21.6)                |                    |        |
| <b>Numbness and paraesthesia<br/>of feet(475(47.5))</b>                               | No  | 432(82.3)                   | 93(17.7)                 | 1.37(1.00-1.86)    | 0.048  |
|                                                                                       | Yes | 367(77.3)                   | 108(22.7)                |                    |        |
| <b>Urinary symptoms<br/>(316(31.6))</b>                                               | No  | 558(81.6)                   | 126(18.4)                | 1.38(0.99-1.90)    | 0.051  |
|                                                                                       | Yes | 241(76.3)                   | 75(23.7)                 |                    |        |
| <b>Visual impairment<br/>(594(59.4))</b>                                              | No  | 326(80.3)                   | 80(19.7)                 | 1.04(0.76-1.43)    | 0.796  |
|                                                                                       | Yes | 473(79.6)                   | 121(20.4)                |                    |        |
| <b>Not independent in Basic<br/>Activities of daily living<br/>(59(5.9))</b>          | Yes | 766(81.4)                   | 175(18.6)                | 3.45(2.01-5.92)    | <0.001 |
|                                                                                       | No  | 33(55.9)                    | 26(44.1)                 |                    |        |
| <b>Not independent in<br/>Instrumental activities of<br/>daily living (306(30.6))</b> | Yes | 572(82.4)                   | 122(17.6)                | 1.63(1.18-2.25)    | 0.003  |
|                                                                                       | No  | 227(74.2)                   | 79(25.8)                 |                    |        |
| <b>Regular exercise or Yoga<br/>(342(34.2))</b>                                       | Yes | 281(82.2)                   | 61(17.8)                 | 1.25(0.89-1.74)    | 0.198  |
|                                                                                       | No  | 518(78.7)                   | 140(21.3)                |                    |        |
| <b>History of falls in the previous<br/>1 year (269(26.9))</b>                        | Yes | 182(67.7)                   | 87(32.3)                 | 2.59 (1.87 – 3.58) | <0.001 |
|                                                                                       | No  | 617(84.4)                   | 114(15.6)                |                    |        |

**Table 4 Risk factors of falls in community dwelling elderly subjects**

| Risk Factors                                   | Odds Ratio (95% CI) | P value |
|------------------------------------------------|---------------------|---------|
| <b>All Falls</b>                               |                     |         |
| Females                                        | 1.48 (1.05, 2.10)   | 0.027   |
| Movement disorders / Parkinson's Disease       | 2.26 (1.00, 5.05)   | 0.048   |
| Arthritis                                      | 1.48 (1.05, 2.09)   | 0.026   |
| Dependence in basic activities of daily living | 3.49 (2.00, 6.09)   | <0.001  |
| Not using antihypertensive medications         | 1.53 (1.10, 2.13)   | 0.012   |
| Living alone during daytime                    | 3.27 (1.59, 6.71)   | 0.001   |
| History of falls in previous year              | 2.25 (1.60, 3.15)   | <0.001  |
| <b>Recurrent Falls</b>                         |                     |         |
| Females                                        | 2.05 (1.07, 3.95)   | 0.031   |
| Dependence in basic activities of daily living | 3.63 (1.71, 7.70)   | 0.001   |
| History of falls in previous year              | 3.39 (1.89, 6.05)   | <0.001  |

## Figure

**Fig.1 Flowchart of the Study Design**

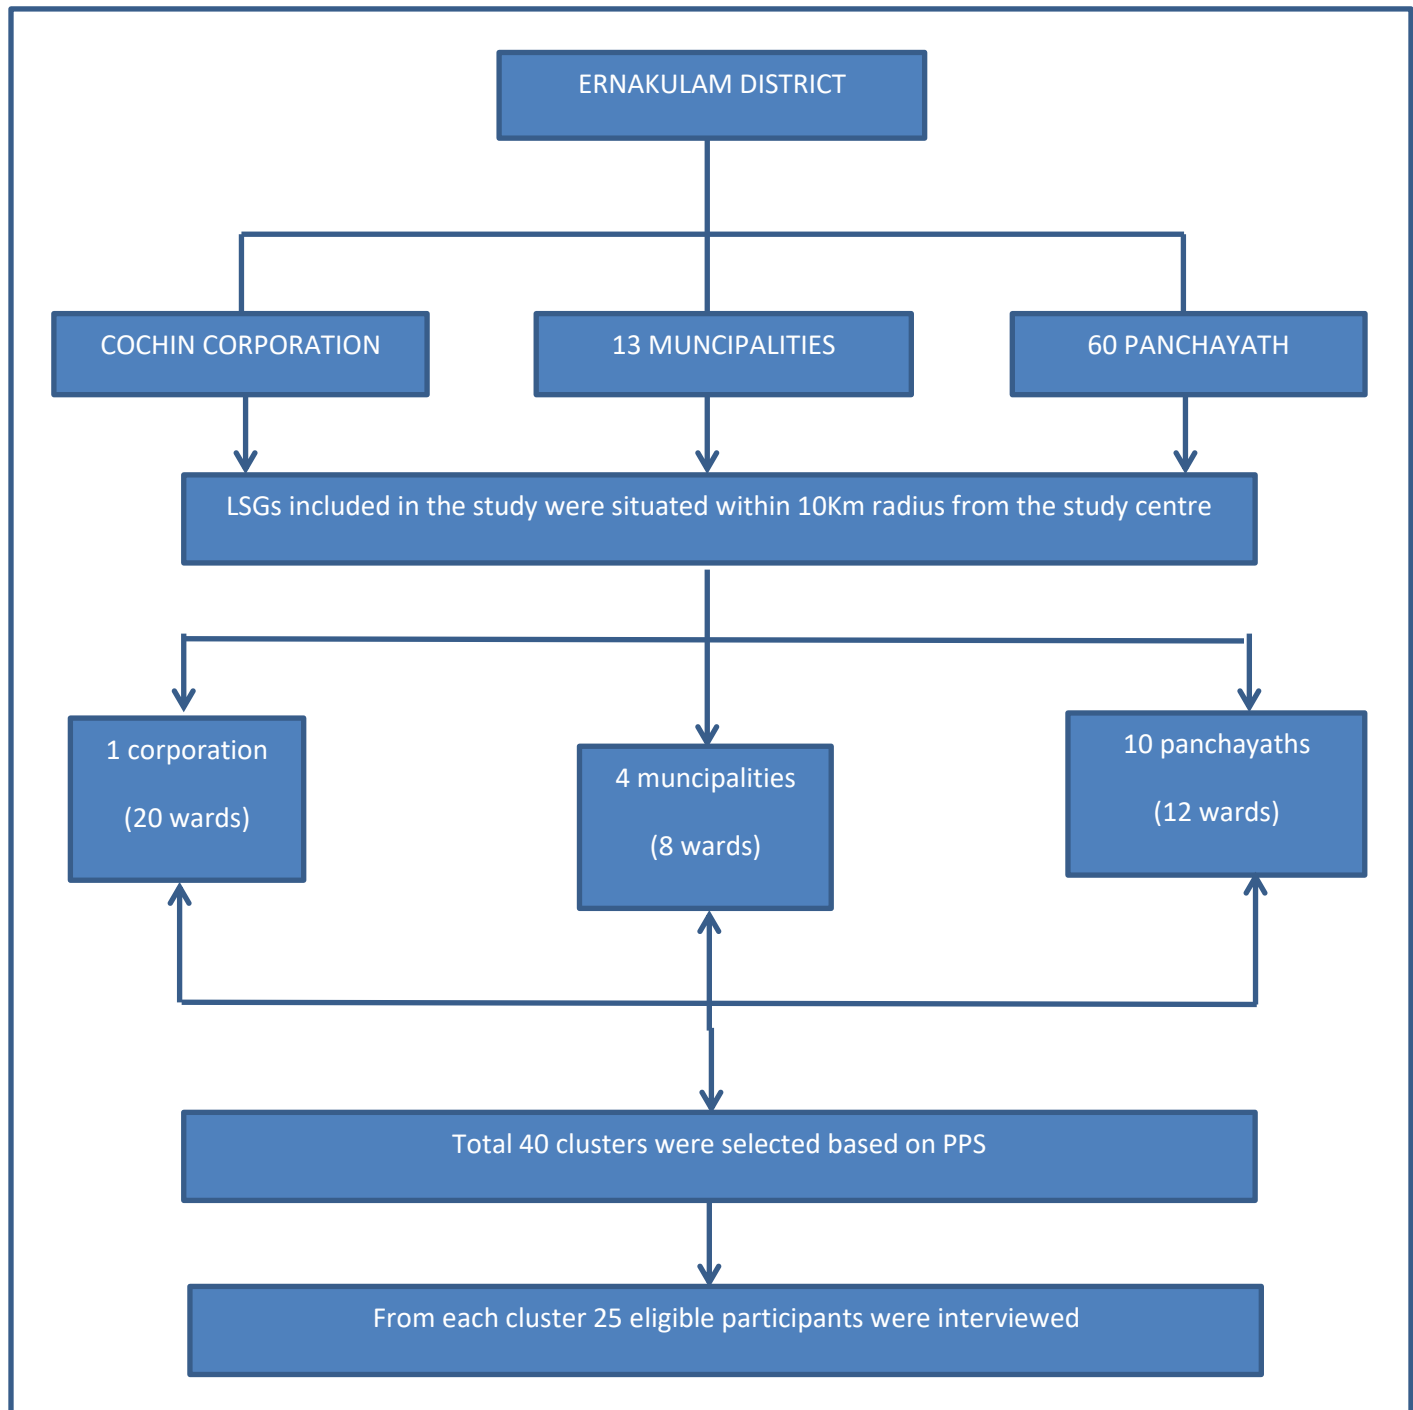

## APPENDIX IV

### INFORMED CONSENT

**Introduction:** Falls are a very common and often devastating problem in the elderly population. Most of these patients, who fall, end up getting injured, needing hospitalization or even surgical procedures. The prevalence of falls in the elderly is high and debilitating to the patients. However this aspect of health care is mostly neglected in our setup unless and until a person reports after a fall. Hence I feel this study will help us to assess the risk of fall in our population.

**Name of project:** A PROSPECTIVE STUDY TO ASSESS THE PREVALENCE OF FALLS IN ELDERLY IN ERNAKULAM DISTRICT AND ITS ASSOCIATED RISK FACTORS OVER 1 YEAR

**Co coordinating center:** Geriatric department, Amrita Institute of medical sciences, Kochi

**Name of respondent**.....

**Address**.....

#### **Invitation and Purpose of the study:**

We are conducting a study in which we are trying to understand the prevalence of fall in elderly in Kochi, Kerala, India and to find out the factors associated with these falls, with your permission, we would like to conduct this study. Please go through the details of the project below

#### **Do I have to take part in this study?**

Your participation in this study is voluntary. It is up to you to decide whether to participate in this study. If you change your mind, you are free to withdraw from the study at any time and without giving a reason. Refusal to participate will not involve any penalty or loss.

#### **What do I have to do in this study? What is being studied?**

If you agree to participate in this study, a questionnaire containing questions on environmental and lifestyle factors under study will be used to collect data. Trained investigators with the assistance of translators will administer the questionnaire. You will have to give answers to the questions asked. Follow up shall be done over phone where you have to say if you have fallen during the study period and the details of falls.

*A Prospective Study to Assess the Prevalence of Falls in the Elderly Living in Thrissur District and its Associated Risk Factors*

---

**What are the Methods employed in the study?**

A questionnaire containing questions on environmental and lifestyle factors under study. Basic physical parameters will be assessed, like height, weight, BMI and blood pressure. Memory status and depression status will be assessed using MMSE and GDS tools.

**What are the risks in taking part in this study?**

There are no risks in taking part in the study.

**What are the Benefits?**

The study will not provide you with any direct benefits. This study will put some light to the extent of this unrecognized problem. This information will help in prevention of such falls in elderly.

**Is participation compulsory?**

No. Taking part in this study is on a voluntary basis. If you have any doubt please do not hesitate to ask.

**How will the information collected in the study be used?**

The information collected will be kept completely confidential. At no point will we reveal the identity of the respondents when we analyze the data. Your information will be archived in a coded form. Your permission to the investigator to use this information does not automatically end at a particular time.

However your details will be released to any regulatory authorities if requested for legal/auditing purpose.

**Problems or Questions:**

If you have any question about the study, you may contact your investigator, whose details will be provided to you. You will also be asked to provide your address and contact details as we need to contact you during the study.

Name and Contact Details of the Investigator - Dr. Divyamol Sasidharan

Mob. No. 9995653009

email:divz64@gmail.com

Geriatrics Department

ADMS, Kochi-682041

Name and contact details of local/Central ethics committee chairperson/member -

Dr. Santhi Kumar Nair, ADMS, Kochi-682041



*A Prospective Study to Assess the Prevalence of Falls in the Elderly Living in Ernakulam District and its Associated Risk Factors*

---

I confirm that I have read the written information for study, "Prevalence of falls in elderly in Ernakulam district and its associated risk factors over 1 year in Kochi, Kerala, India", and confirm that

- I have had the opportunity to ask questions about this study and I am satisfied with the answers and explanations that have been provided.
- I understand that I grant access to data to authorized persons described in the information sheet have been given time and opportunity to consider taking part in this study.
- I understand my participation is voluntary and that I am free to withdraw at any time, without giving reason
- I agree to take part in this study.

I confirm that I have been informed by my investigator that the information collected from me will be used for presentation /scientific publication and research analysis. I understand that such use is for advancement of further medical knowledge. I voluntarily agree to such use. I also understand that my identity will not be revealed in such presentation I express my willingness to the same. Having understood all the facts and the conditions stated above I accept and agree and hereby express my free and voluntary consent to Dr. Divyamol Sasidharam and his associates to participate in the study.

I understand that I have not given up any of my rights by signing this form. I will receive the full copy of the informed consent referred to above, including this signed statement with my signature below:

Signature of respondent:

Address:

Date:

Signature of witness:

Name of witness:

Address:

Date:

1  
2  
3  
4  
5  
6 *A Prospective Study to Assess the Prevalence of Falls in the Elderly Living in Transjordan District and its Associated Risk Factors*  
7

8 I have explained and made Mr. /Mrs. .... understand  
9  
10 the above mentioned details of the study. -  
11  
12  
13  
14

15 Signature of investigator:

16 Name:

17 Address:

18 Date:  
19  
20  
21  
22  
23  
24  
25  
26  
27  
28  
29  
30  
31  
32  
33  
34  
35  
36  
37  
38  
39  
40  
41  
42  
43  
44  
45  
46  
47  
48  
49  
50  
51  
52  
53  
54  
55  
56  
57  
58  
59  
60

# BMJ Open

## Incidence and risk factors for falls among community dwelling elderly subjects on a one year follow up - A prospective cohort study from Ernakulam, Kerala, India

|                                 |                                                                                                                                                                                                                                                                                                                                                                                                                                                                                                                                                                                                                                                 |
|---------------------------------|-------------------------------------------------------------------------------------------------------------------------------------------------------------------------------------------------------------------------------------------------------------------------------------------------------------------------------------------------------------------------------------------------------------------------------------------------------------------------------------------------------------------------------------------------------------------------------------------------------------------------------------------------|
| Journal:                        | <i>BMJ Open</i>                                                                                                                                                                                                                                                                                                                                                                                                                                                                                                                                                                                                                                 |
| Manuscript ID                   | bmjopen-2019-033691.R1                                                                                                                                                                                                                                                                                                                                                                                                                                                                                                                                                                                                                          |
| Article Type:                   | Original research                                                                                                                                                                                                                                                                                                                                                                                                                                                                                                                                                                                                                               |
| Date Submitted by the Author:   | 09-Dec-2019                                                                                                                                                                                                                                                                                                                                                                                                                                                                                                                                                                                                                                     |
| Complete List of Authors:       | Sasidharan, Divyamol; Amrita Institute of Medical Sciences and Research Centre, Geriatric Medicine; Government of Goa Directorate of Health Services, Geriatric Medicine<br>Vijayakumar, Priya; Amrita Vishwa Vidyapeetham, Geriatric Medicine<br>Raj, Manu; Amrita Institute of Medical Sciences and Research Centre, pediatrics & pediatric cardiology<br>Soman, Sumi ; Amrita Vishwa Vidyapeetham, Public Health Research<br>Antony, Libin; Amrita Vishwa Vidyapeetham, Public Health Research<br>Sudhakar, Abish; Amrita Institute of Medical Sciences and Research Centre, Pediatric Cardiology<br>Kabali, Conrad; Health Quality Ontario, |
| <b>Primary Subject Heading</b>: | Geriatric medicine                                                                                                                                                                                                                                                                                                                                                                                                                                                                                                                                                                                                                              |
| Secondary Subject Heading:      | Epidemiology, Public health                                                                                                                                                                                                                                                                                                                                                                                                                                                                                                                                                                                                                     |
| Keywords:                       | Falls, Elderly, Community based study, Cohort Study, Kerala                                                                                                                                                                                                                                                                                                                                                                                                                                                                                                                                                                                     |
|                                 |                                                                                                                                                                                                                                                                                                                                                                                                                                                                                                                                                                                                                                                 |

SCHOLARONE™  
Manuscripts



I, the Submitting Author has the right to grant and does grant on behalf of all authors of the Work (as defined in the below author licence), an exclusive licence and/or a non-exclusive licence for contributions from authors who are: i) UK Crown employees; ii) where BMJ has agreed a CC-BY licence shall apply, and/or iii) in accordance with the terms applicable for US Federal Government officers or employees acting as part of their official duties; on a worldwide, perpetual, irrevocable, royalty-free basis to BMJ Publishing Group Ltd ("BMJ") its licensees and where the relevant Journal is co-owned by BMJ to the co-owners of the Journal, to publish the Work in this journal and any other BMJ products and to exploit all rights, as set out in our [licence](#).

The Submitting Author accepts and understands that any supply made under these terms is made by BMJ to the Submitting Author unless you are acting as an employee on behalf of your employer or a postgraduate student of an affiliated institution which is paying any applicable article publishing charge ("APC") for Open Access articles. Where the Submitting Author wishes to make the Work available on an Open Access basis (and intends to pay the relevant APC), the terms of reuse of such Open Access shall be governed by a Creative Commons licence – details of these licences and which [Creative Commons](#) licence will apply to this Work are set out in our licence referred to above.

Other than as permitted in any relevant BMJ Author's Self Archiving Policies, I confirm this Work has not been accepted for publication elsewhere, is not being considered for publication elsewhere and does not duplicate material already published. I confirm all authors consent to publication of this Work and authorise the granting of this licence.

1 **Type of article:** Original

2 **Title of the article:** Incidence and risk factors for falls among community dwelling  
3 elderly subjects on a one year follow up - A prospective cohort study from Ernakulam,  
4 Kerala, India

5 **Running title :** Risk factors for falls among community dwelling elderly subjects in Kerala

6 **Contributors**

- 7 1. Divyamol K Sasidharan, MD (Geriatric Medicine), [jisbbb87@gmail.com](mailto:jisbbb87@gmail.com), Geriatric  
8 Medicine Department, Amrita Institute of Medical Science, Kochi, Kerala, India
- 9 2. Priya Vijayakumar, MD (General Medicine), [divz64@gmail.com](mailto:divz64@gmail.com), Geriatric Medicine  
10 Department, Amrita Institute of Medical Science, Kochi, Kerala, India
- 11 3. Manu Raj, DNB (Pediatric Cardiology), [drmanuraj@gmail.com](mailto:drmanuraj@gmail.com), Public Health  
12 Research Department, Amrita Institute of Medical Science, Kochi, Kerala, India
- 13 4. Sumi Soman, MSc Nursing, [sumisoman90@gmail.com](mailto:sumisoman90@gmail.com), Public Health Research  
14 Department, Amrita Institute of Medical Science, Kochi, Kerala, India
- 15 5. Libin Antony P F, Msc Nursing, [libinantony.antony@gmail.com](mailto:libinantony.antony@gmail.com), Public Health  
16 Research Department, Amrita Institute of Medical Science, Kochi, Kerala, India
- 17 6. Abish Sudhakar, MA Sociology, [abishsudhakar@aims.amrita.edu](mailto:abishsudhakar@aims.amrita.edu), Paediatric  
18 Cardiology, Amrita Institute of Medical Science, Kochi, Kerala, India
- 19 7. Conrad Kabali, PhD Biostatistics, [ckabali@gmail.com](mailto:ckabali@gmail.com), Division of  
20 Epidemiology, University of Toronto Dalla Lana School of Public  
21 Health, Toronto, Ontario, Canada

22  
23 **Department(s) and institution(s):** Department of Geriatric Medicine, Public Health  
24 Research Department, Amrita Institute of Medical Science, Kochi, Kerala, India

25  
26 **Corresponding Author:**

27 Name : Priya Vijayakumar

28 Address : Clinical Professor

29 Department of Geriatric Medicine

30 Amrita Institute of Medical Sciences, Kochi

1  
2  
3  
4 31 Phone numbers : 9995653009  
5  
6 32 E-mail address : divz64@gmail.com

7  
8 33 Total number of pages: 18

9  
10 34 Total number of photographs: Nil

11  
12 35 Word counts

13  
14 36 for abstract: 318

15  
16 37 for the text: 3462

17  
18 38 Source(s) of support: Nil

19  
20 39 Presentation at a meeting: Nil

21  
22 40

23  
24 41 Conflicting Interest: Nil

25  
26 42

27  
28 43 **Acknowledgement:** We are thankful for the valuable inputs provided by Dr.Sunil K  
29  
30 44 S, Mrs.Ramya Raju, Mrs.Georgina P, Dr.Jishnu S Lalu during planning, data  
31  
32 45 collection and analysis stage.  
33  
34 46

35  
36 47

37  
38 48

39  
40 49 **Title:**

41  
42 50 **Incidence and risk factors for falls among community dwelling elderly subjects on a one**  
43  
44 51 **year follow up - A prospective cohort study from Ernakulam, Kerala, India**

45  
46 52 **Abstract**

47  
48 53 **Purpose :** There is limited data regarding epidemiology and risk of falls in elderly in low  
49  
50 54 middle income countries probably due to lack of awareness regarding the factors leading to  
51  
52 55 falls and the consequences of fall related injuries in old in these countries.

53  
54 56 **Participants :** Community dwelling elderly above 65years of age.

55  
56 57

57  
58 58 **Findings to date :** We recruited a total of 1000 participants. A total of 201(20.1%) subjects  
59  
60

1  
2  
3  
4 59 reported a fall during follow-up. The incidence rate of falls was 31 (95% CI 27.7, 34.6) per  
5 60 100 follow-up years. Female sex (OR 1.48, 95% CI 1.05, 2.10,  $p = 0.027$ ), movement  
6 61 disorders including parkinsonism (OR 2.26, 95% CI, 1.00, 5.05,  $p=0.048$ ), arthritis (OR 1.48,  
7 62 95% CI 1.05, 2.09,  $p=0.026$ ), dependence in basic activities of daily living (OR, 3.49, 95%  
8 63 CI 2.00, 6.09,  $p<0.001$ ), not using antihypertensive medications (OR, 1.53, 95% CI 1.10,  
9 64 2.13,  $p=0.012$ ), living alone during daytime (OR 3.27, 95% CI 1.59, 6.71,  $p=0.001$ ) and a  
10 65 history of falls in the previous year (OR, 2.25, 95% CI 1.60, 3.15,  $p<0.001$ ) predicted a fall  
11 66 in the following year.

12  
13  
14  
15  
16  
17  
18  
19 68 **Future plans:** The Cohort is being followed up to study falls and its relation to mortality.  
20  
21  
22  
23  
24

25 71 **Keywords:** Falls, Elderly, Community based study, Cohort Study, Kerala

26  
27  
28 72 **Strengths and limitations of this study:**

- 29 73
- 30 74 • The study was a prospective cohort study design with large sample size ( $n=1000$ ).
  - 31 75 • The study population represented both urban and rural population from different
  - 32 76 Socio Economic Scale levels.
  - 33 77 • None of the participants were lost to follow up and a fall diary was used to avoid
  - 34 78 recall bias.
  - 35 79 • The data is from a single study setting.
  - 36 80 • The study has a short period of follow up (one year).
- 37  
38  
39  
40  
41  
42  
43  
44

45 82 **Introduction**

46  
47  
48 83 Globally, there are an estimated 962 million people aged 60 or over, comprising 13 per cent  
49 84 of the total population.<sup>1</sup> Unintentional injuries are reported to be the fifth leading cause of  
50 85 death globally in this population and falls constitute two out of every three deaths in this  
51 86 category.<sup>2</sup> The Kellogg International Working Group defined a fall as ‘unintentionally  
52 87 coming to the ground or some lower level and other than as a consequence of sustaining a  
53 88 violent blow, loss of consciousness, sudden onset of paralysis as in stroke or an epileptic  
54 89 seizure’.<sup>3</sup>

1  
2  
3 90 Many prospective population-based studies have examined the epidemiology of falls in the  
4  
5 91 community dwelling elderly across different settings. Environmental factors have been  
6  
7 92 considered as having an association with falls in low middle income countries. Nutrition is  
8  
9 93 not that well addressed among the elders in developing countries. Poor nutrition is a risk  
10  
11 94 factor that could be contributing to the increase in falls in low middle income countries.  
12  
13 95 Interventions that prevent falls are not accessible to a majority of elder population in such  
14  
15 96 countries. Fall preventing interventions are not that freely available in many part of such  
16  
17 97 countries.<sup>4</sup>

17 98 The reported incidence rates show wide variability from as low as 29% to as high as 40% in  
18  
19 99 this population.<sup>5-10</sup> Various studies done in India have reported the prevalence of falls in  
20  
21 100 community dwelling elderly ranging from 13-53%.<sup>11-14</sup> The incidence of recurrent falls (more  
22  
23 101 than two episodes per calendar year) was reported to be 11 to 21% by Lord et al.<sup>5</sup>

24  
25 102 The risk factors for falls in the elderly as reported by Lord et al can be grouped into seven  
26  
27 103 major categories.<sup>5</sup> These include socio-demographic factors, balance and mobility factors,  
28  
29 104 sensory and neuromuscular factors, psychological factors, medical factors, medication use,  
30  
31 105 and environmental factors.<sup>5</sup> A recent meta-analysis by Deandrea et al pooled data from 74  
32  
33 106 prospective cohort studies that reported risk factors for prospective falls among community  
34  
35 107 dwelling elders.<sup>15</sup> A prior history of falls, gait problems, walking aid use, vertigo, parkinson  
36  
37 108 disease and anti-epileptic drug use were the dominant reasons for prospective falls in this age  
38  
39 109 group.<sup>15</sup>

39 110 The primary objective of our study was to report the incidence of falls in community  
40  
41 111 dwelling elderly population from Ernakulam, Kerala, India through a year-long prospective  
42  
43 112 follow up schedule. The secondary objective was to identify factors that can predict a risk for  
44  
45 113 future fall in community dwelling elders.

46  
47 114

#### 48 49 115 **Methods:**

##### 50 51 116 *Selection and Description of participants:*

52  
53  
54 117 **Design & Setting:** The current study is a community based prospective cohort study that was  
55  
56 118 conducted in an area within 10 km radius from the study centre (Amrita Institute of Medical  
57  
58 119 Sciences and Research Centre, Kochi, Kerala). The study was conducted over a period of



1  
2  
3 120 three years (Nov 2014 to Nov 2017). This circular area included 12 panchayats, four  
4  
5 121 municipalities and one corporation. The study area comes under Ernakulam district of Kerala,  
6  
7 122 South India.

8  
9 123 We calculated the sample size using a previously published study by Mitchell-Fearson et al  
10  
11 124 which reported 21.7% prevalence for falls in the elderly.<sup>16</sup> We selected an alpha of 0.05 and  
12  
13 125 an allowable error of 20% giving us a minimum sample size of 347 subjects. The design  
14  
15 126 effect for the sampling method (multistage stratified random cluster sampling) was calculated  
16  
17 127 using a pilot of ten clusters (cluster size k=25) that provided an Intra Class Correlation (ICC)  
18  
19 128 of 0.023. The sample size adjusted for design effect was 539 (inflation factor of 1.552). We  
20  
21 129 enrolled a total of 1000 participants anticipating significant sub group differences within the  
22  
23 130 study sample.

24 131 **Participants:** We used stratified random cluster sampling method to select the participants.  
25  
26 132 The sample was stratified at two levels, rural urban (level 1) and at the level of individual  
27  
28 133 local self-governing units (LSGs, level 2). A total of 40 clusters using Probability  
29  
30 134 proportional to size technique were selected randomly from the list of all available clusters  
31  
32 135 within the defined geographical area. Each cluster was from an individual electoral ward  
33  
34 136 within the LSGs. We selected 25 participants from each cluster. In each cluster, a random  
35  
36 137 starting point was selected and households were visited in a sequential manner by the  
37  
38 138 principal investigator and staff till 25 subjects were recruited. A flowchart on the study  
39  
40 139 design used in the present study is shown in figure.1. The inclusion criteria included (i)  
41  
42 140 minimum age of 65 years or more (ii) ambulant physical status (iii) intention to stay in the  
43  
44 141 study area for a minimum of one year after assessment and (iv) ability to communicate in  
45  
46 142 English/Malayalam language. The exclusion criteria included complete dependence for day  
47  
48 143 to day activities.

47 144 **Operational definitions:**

48  
49 145 Fall was defined as suggested by The Kellogg International Working Group as mentioned in  
50  
51 146 the introduction.<sup>3</sup>

52  
53  
54 147 A recurrent fall was defined as fall of two or more times during the follow up period of one  
55  
56 148 year.<sup>5</sup>

1  
2  
3 149 **Patient and public involvement:** Patients and the public were not specifically involved in  
4  
5 150 the planning and execution of this study. However, they were informed of the need of the  
6  
7 151 study and quarterly follow up was done telephonically.  
8

9 152 ***Technical Information and Interventions:***

10  
11 153 A study questionnaire was prepared after a detailed literature review of studies related to falls  
12  
13 154 in the elderly. The study questionnaire included questions relating to the socio-demographic  
14  
15 155 profile, comorbidities, physical activity, medication use and environmental assessment. This  
16  
17 156 questionnaire was initially piloted over a small number of patients (n=50) and redundant  
18  
19 157 questions were either removed or modified. The modified questionnaire was reviewed by  
20  
21 158 subject experts and was approved for use in the full study.  
22

23 159 All initial assessments were done at the participant's home. The research team (PI, two  
24  
25 160 nurses) visited all recruited subjects at their home premises. The study questionnaire was  
26  
27 161 administered by the PI by means of a face to face interview during house visits. In addition,  
28  
29 162 height, weight and blood pressure readings were taken by the trained staff (nurses) that  
30  
31 163 accompanied the PI. All subjects were advised to keep a fall diary in which they should note  
32  
33 164 down and incidence of fall along with the date and time of fall, what the patient was doing  
34  
35 165 when he fell, what caused the fall, whether it was witnessed fall or not and whether the fall  
36  
37 166 had any consequences or complications. Three monthly follow up was done by telephonic  
38  
39 167 conversation with enrolled subjects for one year from first visit. Those who were not  
40  
41 168 available over the phone were revisited via house visits by the research staff and hence no  
42  
43 169 missing data was encountered in the study. In addition, the fall diaries of those who reported  
44  
45 170 a fall from the same cluster were reviewed during these house visits. The data collection  
46  
47 171 period was from August 2015 to April 2017.

48  
49 172 ***Statistics:***

50  
51 173 We summarized demographic and social-economic variables to characterize the study  
52  
53 174 population (Table 1). We presented the mean and standard deviation for normally distributed  
54  
55 175 continuous variables. Values are expressed in number and percentages. We used Chi square  
56  
57 176 test to examine the association of categorical risk factors with prospective falls. All individual  
58  
59 177 factors with a p value of <0.2 for association on bivariate analysis was selected for  
60  
178 multivariate analysis. Multiple binary logistic regression was used to construct the prediction

1  
2  
3 179 model for prospective falls. We selected Logistic regression after verifying lack of over-  
4  
5 180 dispersion using the Pearson and deviance methods. The cut-off point for statistical  
6  
7 181 significance was set at an  $\alpha$ -level of 5%. We reported the adjusted Odds Ratios (aOR) with  
8  
9 182 95% confidence intervals. We encountered no missing data in the study. Statistical analysis  
10  
11 183 was done using IBM SPSS Statistics 20 Windows (SPSS Inc., Chicago, USA).

#### 12 13 184 ***Ethical approval:***

14  
15 185 We collected written informed consent from the consenting subjects before recruitment to the  
16  
17 186 study and the same was documented for future reference. The consent contained the title,  
18  
19 187 purpose, methods employed in the study, benefits to the subject as well as family and the  
20  
21 188 interest of the respondent to participate on a voluntary basis to the study. The confidentiality  
22  
23 189 of the study during the analysis was also mentioned in the consent. The consent process and  
24  
25 190 study protocol was approved by the Institutional Ethics Committee of Amrita Institute of  
26  
27 191 Medical Sciences and Research centre. (Institutional Ethics Committee Registration Number:  
28  
29 192 ECR/129/Inst/KL/2013).

#### 30 193 **Results**

##### 31 32 194 ***Baseline Characteristics of the study population***

33  
34 195 We recruited a total of 1000 participants from 40 individual pre-designated clusters spread  
35  
36 196 across a circular geographical area with the study institution as the centre point of which 568  
37  
38 197 (56.8%) were female. The distribution of gender, age categories, weight status, education  
39  
40 198 level, household living pattern and area of domicile are presented in Table 1. The mean age  
41  
42 199 of the study subjects was 72.7(7.2) years. Among study participants, 568 (56.8%) were  
43  
44 200 female, 87.4% were literate and 82% lived with family or caretakers. A total of 348 (34.8%)  
45  
46 201 were either pre-obese or obese as per Asian Criteria of BMI classification.<sup>17</sup> The morbidity  
47  
48 202 profile of the study population was published earlier.<sup>18</sup> The self-reported prevalence of  
49  
50 203 diabetes(DM), coronary artery diseases(CAD) and cerebrovascular accidents (CVA) were  
51  
52 204 34.2%, 20.1%&5.3% respectively. Among study subjects, 768 (76.8%) were hypertensive as  
53  
54 205 documented either by high values on house visit measurement or by current treatment for  
55  
56 206 hypertension. Among hypertensives, a total of 528 subjects (68.8%) reported taking  
57  
58 207 treatment for hypertension and remaining 240(31.2%) were newly detected during the  
59  
60 208 baseline evaluation of the study.

### 209 ***Incidence of falls in the study population***

210 A total of 201(20.1%) subjects reported a fall during the prospective follow up period of one  
211 year. The total fall episodes during the follow up period were 301. The overall incidence rate  
212 of falls was 31 (95% CI 27.7, 34.6) per 100 follow up years. The corresponding figures for  
213 elderly men and women separately were 21.2 (95% CI 18.5, 24.2) & 38.3 (95% CI, 34.6,  
214 42.3) respectively. The stratified incidence rates for age groups 65-75, 75-85 & more than 85  
215 were 27.4, 36.8 and 41.1 per 100 follow up years respectively. Among participants, more  
216 women reported a fall compared to men (23.6% v/s 15.5%, p, 0.002). In the age stratified  
217 groups, 27(30.0%) subjects in the age group >85 years reported a fall in the follow up period,  
218 compared to 54(20.6%) in the age group 75-85 years and 120(18.5%) in the 65-75 years  
219 group. (p 0.038). In addition, 53 (5.3 %) people sustained recurrent falls (two or more falls)  
220 during the follow up.

### 221 ***Factors associated with prospective falls.***

222 The association of baseline factors with a prospective history of falls during the follow up  
223 period is presented in **Table 2** as unadjusted bivariate comparisons. Among all baseline  
224 variables, only gender and living arrangement showed a significant association with a  
225 prospective history of falls on bivariate comparisons. Females had a higher risk of fall when  
226 compared to males (OR 1.68, 95% CI, 1.21, 2.33. p 0.002). Those living alone during  
227 daytime also had a higher risk of falls when compared to those living with family/caretaker  
228 (OR 2.95, 95% CI, 1.47, 5.94. p 0.002). The association of prospective falls with factors  
229 affecting locomotion was explored by bivariate analysis and is presented in **Table 3**. Among  
230 the factors affecting locomotion, only parkinsonism (OR 2.66, 95% CI, 1.23, 5.78. p 0.010),  
231 vertigo (OR 1.51, 95% CI, 1.10, 2.06. p 0.010), arthritis (OR 1.62, 95% CI, 1.17, 2.25. p  
232 0.004), numbness and paraesthesia of feet (OR 1.37, 95% CI, 1.00, 1.86. p 0.048) dependence  
233 in basic activities of daily living (OR 3.45, 95% CI, 2.01, 5.92. p <0.001) and dependence in  
234 instrumental activities of daily living (OR 1.63, 95% CI, 1.18, 2.25. p 0.003) showed  
235 significant associations with prospective falls on bivariate comparisons. A history of falls in  
236 the preceding year also had a higher risk for prospective falls (OR 2.59, 95% CI, 1.87, 3.58. p  
237 <0.001).

238  
239 Among baseline factors only gender showed an association with recurrent falls on bivariate  
240 comparisons (OR 2.44, 95% CI, 1.29, 4.63. p 0.005). Among factors affecting locomotion

1  
2  
3 241 dependence in basic activities of daily living (OR 5.00, 95% CI, 2.38, 10.10. p <0.001),  
4  
5 242 dependence in instrumental activities of daily living (OR 1.79, 95% CI, 1.03, 3.12. p = 0.038)  
6  
7 243 and a history of falls in the preceding year (OR 4.20, 95% CI, 2.38, 7.39 p <0.001) showed an  
8  
9 244 association with recurrent falls on bivariate comparisons.

10  
11 245

12 246 In the study population, 474(47.4%) subjects reported taking anti-hypertensives, 277(27.7%)  
13  
14 247 reported taking anti diabetic medications and 69(6.9%) reported taking either  
15  
16 248 benzodiazepines or other sedative drugs. There was no significant association for prospective  
17  
18 249 falls with use of anti-hypertensive medications (OR 0.77, 95% CI 0.57, 1.06, p = 0.104), anti-  
19  
20 250 diabetic medications (OR 1.14, 95% CI 0.81, 1.60, p=0.446) or benzodiazepines/sedatives  
21  
22 251 (OR 1.56, 95% CI 0.90, 2.72, p=0.110) in bivariate comparisons.

### 23 252 ***Independent Risk Factors for prospective falls***

24  
25 253 The final adjusted model with independent predictors of prospective falls in the elderly is  
26  
27 254 presented as Table 4. The variables found to be significant(P value <0.2) in bivariate analysis  
28  
29 255 with falls were age, sex, living arrangement, vertigo, parkinsonism, arthritis, urinary  
30  
31 256 symptoms, constipation, knee pain, paresthesia of feet, history of fall in the previous year,  
32  
33 257 dependence in basic and instrumental activities of daily living, use of assistive devices for  
34  
35 258 movement, cognitive impairment, depression, use of antihypertensive medications and  
36  
37 259 benzodiazepines. The same were included in the final model construction. Among the factors  
38  
39 260 examined in the logistic regression model, female sex (OR 1.48, 95% CI 1.05, 2.10, p =  
40  
41 261 0.027), parkinsonism (OR 2.26, 95% CI 1.00, 5.05, p=0.048), arthritis (OR 1.48, 95% CI  
42  
43 262 1.05-2.09, p=0.026), dependence in basic activities of daily living (OR 3.49, 95% CI 2.00,  
44  
45 263 6.09, p<0.001), not using antihypertensive medications (OR 1.53, 95% CI 1.10-2.13,  
46  
47 264 p=0.012), living alone during the daytime (OR 3.27, 95% CI 1.59-6.71, p=0.001) and history  
48  
49 265 of falls in the previous year (OR 2.59, 95% CI 1.87, 3.58, p<0.001) were found to be  
50  
51 266 significantly associated with falls.

52  
53 267 The factors included to assess the independent risk factors of recurrent falls were, female sex,  
54  
55 268 vertigo, parkinsonism, arthritis and dependence in basic and instrumental activities of daily  
56  
57 269 living and history of falls in the previous year. From the above, the independent predictors for  
58  
59 270 recurrent falls were female sex (OR 2.05, 95% CI 1.07, 3.95, p = 0.031), dependence in basic  
60  
271 activities of daily living (OR 3.63, 95% CI 1.71, 7.70, p = 0.001), and history of falls in the  
272 previous year (OR 3.39, 95% CI 1.89, 6.05, p<0.001).

## 273 Discussion

274 This community based prospective cohort study provides details of 301 fall episodes  
275 experienced by 201 elderly subjects during a follow up period of one year from Ernakulam,  
276 Kerala, India. Approximately one in five elderly subjects in this age group reported a fall  
277 during the study period. There appears to be a sex based difference in the proportion that fell  
278 with one in four elderly women falling compared to one in six men during follow up. The  
279 results also suggest a dose response relationship between age and falls with more subjects  
280 falling in older age groups compared to relatively younger groups. In addition, every fourth  
281 person who fell reported one or more falls following the index fall episode during the study  
282 period. The independent predictors for falls in the elderly included female sex, parkinsonism  
283 and related movement disorders, arthritis, dependence in basic activities of daily living, not  
284 using antihypertensive medicines, living alone during daytime and a history of fall in the  
285 preceding year. The corresponding predictors for recurrent falls included female sex,  
286 dependence in basic activities of daily living and a history of fall in the preceding year. To  
287 our knowledge, this is the only prospective cohort study done in India that focussed on falls  
288 in free living elderly who were assessed in the community setting.

289 The incidence of falls in the elderly from our study appears to be at the lower end of the  
290 spectrum as reported by western studies (29% to 40%).<sup>5-10</sup> Interestingly, our results are more  
291 similar to that reported by a prospective study among community dwelling elderly Chinese  
292 subjects.<sup>19</sup> The incidence rate of falls in this study were 27.0, 32.4 and 22.0 per 100 person-  
293 years for all elderly, women and men respectively. The proportion with recurrent falls in this  
294 study was also similar to our study (4.75% v/s 5.3%).

295 The risk factors for prospective falls in community dwelling elderly was examined by a  
296 recent meta-analysis by Deandrea et al that pooled 74 prospective cohorts.<sup>15</sup> Most of the  
297 prospective studies in the meta-analysis suggested that community dwelling elderly women  
298 are at higher risk for falls compared to their male counterparts. The pooled estimates for falls  
299 (OR 1.30, 95% CI, 1.18, 1.42) and recurrent falls (OR 1.34, 95% CI, 1.12, 1.60) in this meta-  
300 analysis are in agreement with the current study.

301 Several prospective studies have reported higher risk for falls among elderly patients with  
302 Parkinsonism and/or related movement disorders similar to the current study. The meta-  
303 analysis suggested an adjusted OR of 2.71 (95% CI, 1.08, 6.84) for falls and 2.84 (95% CI,

1  
2  
3 304 1.77, 4.58) for recurrent falls from five studies that looked for the same. Our study didn't  
4  
5 305 report any positive association between Parkinson's disease and recurrent falls, probably due  
6  
7 306 to the small number of recurrent fallers (5.3%) in the cohort.  
8

9  
10 307 Our finding of high risk for falls among those elderly with arthritis is in concordance with  
11  
12 308 several other studies.<sup>20-23</sup> Together these studies suggest that elderly with arthritis and/or  
13  
14 309 chronic pain have a higher risk for falls. The GLOW cohort also reported a higher incidence  
15  
16 310 of falls and fractures in postmenopausal women with osteoarthritis compared to osteoarthritis  
17  
18 311 free peers.<sup>23</sup>  
19

20  
21 313 Several studies have reported that living alone during the daytime is a risk factor for falls in  
22  
23 314 the elderly as suggested by the current study.<sup>15</sup> The meta-analysis is also in agreement with  
24  
25 315 this observation (OR 1.33, 95% CI, 1.21, 1.45) after looking at data from 11 studies that  
26  
27 316 examined the same.

28  
29 317 Reduced BADL( Basic Activities of Daily Living) capability is also reported to be associated  
30  
31 318 with falls in the elderly.<sup>24</sup> Yokoya et al recently concluded that higher frequency of leaving  
32  
33 319 home, higher exercise levels and presence of interest in activities (e.g., meeting friends,  
34  
35 320 shopping, working in the garden) were associated with a reduced risk for fall in community  
36  
37 321 dwelling elders.<sup>24</sup> Maintaining and enhancing physical functions, principally walking ability  
38  
39 322 and walking speed are critical for fall prevention among elderly.<sup>25,26</sup> Age appropriate  
40  
41 323 exercises including those enhancing muscle strength and improving balance can probably  
42  
43 324 reduce the incidence of falls among elderly.<sup>26</sup>

44  
45 325 A history of falls in the previous year appears to be the most consistent risk factor across  
46  
47 326 several studies.<sup>15,26,27</sup> Pooled data from several studies in the recent meta-analysis puts the  
48  
49 327 risk at an OR of 2.77 (95% CI, 2.37, 3.25) for falls and an OR of 3.46 (95%CI, 2.85, 4.22) for  
50  
51 328 recurrent falls, in agreement with the current study (2.59 & 3.39 respectively).<sup>15</sup> Suzuki et al  
52  
53 329 reported that five out of six elderly with a history of falls were anxious about another fall and  
54  
55 330 one in three said that they did not venture out again due to fear of another fall.<sup>26</sup>

56  
57 331 One notable finding in our study was the lack of association for falls with medication use for  
58  
59 332 most groups of medications except for antihypertensive medications. This is in contrast to a  
60  
333 meta-analysis of the impact of medication classes on falls in elderly.<sup>28</sup> Woolcott et al reported

1  
2  
3 334 an OR of 1.41 (95% CI, 1.20-1.71) for falls among elderly with benzodiazepine use.<sup>28</sup> The  
4  
5 335 lack of association between sedatives use and falls in our study is probably due to the limited  
6  
7 336 number of subjects reporting the use of the same (6.9%). We saw an inverse association  
8  
9 337 between falls and the use of antihypertensive drug use in the current study. One probable  
10  
11 338 reason could be the high proportion of uncontrolled hypertensives in the study population.  
12 339 This finding needs to be explored further in future studies.

13  
14 340 The strengths of the current study include; prospective cohort study design, large sample size  
15  
16 341 (n=1000), representative urban and rural population components, inclusion of participants  
17  
18 342 from different Socioeconomic levels, no participants lost to follow up and use of a fall diary  
19  
20 343 to avoid recall bias. However, the study included participants from a limited geographical  
21  
22 344 setting and was able to follow up only for a shorter period (one year) and hence the  
23 345 generalisation of the study findings is limited.

24  
25 346

26  
27 347

28  
29 348 ***Funding:***

30  
31 349

32 350 This research received no specific grant from any funding agency in the public, commercial  
33  
34 351 or not-for-profit sectors.

35  
36 352

37 353 **Conclusion**

38  
39 354

40 355 One in five community dwelling elderly citizens fall on an annual basis and one in four of  
41  
42 356 those who fall are prone to fall again in the same calendar year. Female sex, movement  
43  
44 357 disorders including parkinsonism, arthritis, dependence in basic activities of daily living,  
45  
46 358 living alone during daytime and a history of falls in the previous year appear to predict a fall  
47  
48 359 in the following year. Any intervention targeting a reduction in falls among the elderly need  
49  
50 360 to focus on the modifiable risk factors like living alone at home during daytime, movement  
51  
52 361 disorders and arthritis. We need to encourage mechanisms that may reduce dependence of  
53  
54 362 elderly on basic activities of daily living. Attention should also be given to encourage both  
55  
56 363 physical activity and interests in social activities among elderly subjects.

57 364

58 365 **Competing Interests:** Authors have no competing interests.

59 366



1  
2  
3 **367 References:**

- 4 368
- 5 369 1. United Nations, Department of Economic and Social Affairs, Population Division (2017). World Population Prospects:  
6 370 The 2017 Revision, Key Findings and Advance Tables. Working Paper No. ESA/P/WP/248., n.d.
- 7
- 8 371 2. Rubenstein LZ. Falls in older people: epidemiology, risk factors and strategies for prevention. *Age Ageing*. 2006 Sep;35  
9 372 Suppl 2:ii37-ii41.
- 10 373 3. Gibson MJ, Andres RO, Isaacs B, Radebaugh T, Worm-Petersen J. The prevention of falls in later life. A report of the  
11 374 Kellogg International Work Group on the prevention of falls by the elderly. *Danish Medical Bulletin* 1987;34(Suppl 4):1–24.
- 12 375 4. Heather Hestekin et al., “Measuring Prevalence and Risk Factors for Fall Related Injury in Older Adult in Low  
13 376 Middle Income Countries, Results from the WHO Study on Global AGEing and Adult Health,” July 2013, 06.
- 14 377 5. Lord SR, Sherrington C, Menz HB. *Falls in Older People: Risk Factors and Strategies for Prevention*. 2nd ed. Cambridge,  
15 378 MA: Cambridge University Press; 2007.
- 16 379 6. Tinetti ME, Speechley M, Ginter SF. Risk factors for falls among elderly persons living in the community. *N Engl J Med*.  
17 380 1988 Dec 29;319(26):1701-7.
- 18 381 7. O’Loughlin JL, Robitaille Y, Boivin JF, Suissa S. Incidence of and risk factors for falls and injurious falls among the  
19 382 community-dwelling elderly. *Am J Epidemiol*. 1993 Feb 1;137(3):342-54.
- 20 383 8. Lord SR, Ward JA, Williams P, Anstey KJ. An epidemiological study of falls in older community-dwelling women: the  
21 384 Randwick falls and fractures study. *Aust J Public Health*. 1993 Sep;17(3):240-5.
- 22 385 9. Campbell AJ, Borrie MJ, Spears GF. Risk factors for falls in a community-based prospective study of people 70 years and  
23 386 older. *J Gerontol*. 1989 Jul;44(4):M112-7.
- 24 387 10. Luukinen H, Koski K, Laippala P, Kivelä SL. Predictors for recurrent falls among the home-dwelling elderly. *Scand J*  
25 388 *Prim Health Care*. 1995 Dec;13(4):294-9.
- 26 389 11. Aniket Sirohi1, Ravneet Kaur, Anil Kumar Goswami, Kalaivani Mani, Baridalyne Nongkynrih, Sanjeev Kumar Gupta,  
27 390 “A Study of Falls among Elderly Persons in a Rural Area of Haryana,” *Indian Journal of Public Health* 61, no. 2 (2017): 99–  
28 391 104, [https://doi.org/10.4103/ijph.IJPH\\_102\\_16](https://doi.org/10.4103/ijph.IJPH_102_16).
- 29 392 12. Dr. B. Krishnaswamy, Dr. Gnanasambandam Usha, “FALLS IN OLDER PEOPLE NATIONAL / REGIONAL  
30 393 REVIEW INDIA,” n.d., <http://www.who.int/ageing/projects/SEARO.pdf>.
- 31 394 13. Dr Anku Moni Saikia, Dr Ashok Kumar Das, Ms Anjana Moyee Saikia, “Prevalence and Correlates of Falls among  
32 395 Community-Dwelling Elderly of Guwahati City, Assam,” *Indian Journal of Basic and Applied Medical Research*; 5, no. 2  
33 396 (March 2016): 185–90.
- 34 397 14. Pawan Kumar Sharma, Clare Bunker, Tushar Singh, Enakshi Ganguly, P sudhakar Reddy, Anne B Newman et al.,  
35 398 “Burden and Correlates of Falls among Rural Elders of South India: Mobility and Independent Living in Elders Study,”  
36 399 *Current Gerontology and Geriatrics Research* 2017 (2017): 1–8, <https://doi.org/10.1155/2017/1290936>.
- 37 400 15. Deandrea S, Lucenteforte E, Bravi F, Foschi R, La Vecchia C, Negri E. Risk factors for falls in community-dwelling  
38 401 older people: a systematic review and meta-analysis. *Epidemiology*. 2010 Sep;21(5):658-68.
- 39 402 16. Kathryn Mitchell-Fearon et al., “Falls Among Community-Dwelling Older Adults in Jamaica,” *SAGE Open* 4, no. 4  
40 403 (December 18, 2014): 215824401456435, <https://doi.org/10.1177/2158244014564351>.
- 41 404 17. “Appropriate Body-Mass Index for Asian Populations and Its Implications for Policy and Intervention Strategies,” *The*  
42 405 *Lancet* 363, no. 9403 (January 2004): 157–63, [https://doi.org/10.1016/S0140-6736\(03\)15268-3](https://doi.org/10.1016/S0140-6736(03)15268-3).
- 43 406
- 44 407 18. Divyamol K Sasidharan, Lalu J S, Vijayakumar P et al. “Morbidity Pattern Among The Geriatric Population In South  
45 408 India: An Observational Study,” *Epidemiology International* 03, no. 01 (April 2, 2018): 11–17,  
46 409 <https://doi.org/10.24321/2455.7048.201803>
- 47 410
- 48 411 19. Chu LW, Chi I, Chiu AY. Incidence and predictors of falls in the Chinese elderly. *Ann Acad Med Singapore*. 2005  
49 412 Jan;34(1):60-72.
- 50 413 20. Suzanne G. Leveille, “Chronic Musculoskeletal Pain and the Occurrence of Falls in an Older Population,” *JAMA* 302,  
51 414 no. 20 (November 25, 2009): 2214, <https://doi.org/10.1001/jama.2009.1738>.
- 52 415 21. Adam L. Doré et al., “Lower-Extremity Osteoarthritis and the Risk of Falls in a Community-Based Longitudinal Study  
53 416 of Adults with and without Osteoarthritis,” *Arthritis Care & Research* 67, no. 5 (May 2015): 633–39,  
54 417 <https://doi.org/10.1002/acr.22499>.
- 55 418 22. Keith D. Hill et al., “Balance and Falls Risk in Women with Lower Limb Osteoarthritis or Rheumatoid Arthritis,”  
56 419 *Journal of Clinical Gerontology and Geriatrics* 4, no. 1 (March 2013): 22–28, <https://doi.org/10.1016/j.jcgg.2012.10.003>.

- 1  
2  
3 420 23. Daniel Prieto-Alhambra et al., “An Increased Rate of Falling Leads to a Rise in Fracture Risk in Postmenopausal Women  
4 421 with Self-Reported Osteoarthritis: A Prospective Multinational Cohort Study (GLOW),” *Annals of the Rheumatic Diseases*  
5 422 72, no. 6 (June 2013): 911–17, <https://doi.org/10.1136/annrheumdis-2012-201451>.
- 6 423 24. Yokoya T, Demura S, Sato S. Relationships between physical activity, ADL capability and fall risk in community-  
7 424 dwelling Japanese elderly population. *Environ Health Prev Med.* 2007 Jan;12(1):25-32.
- 8 425 25. Maki BE. Selection of perturbation parameters for identification of the posture-control system. *Med Biol Eng Comput.*  
9 426 1986 Nov;24(6):561-8.
- 10 427 26. Suzuki T. [Epidemiology and implications of falling among the elderly]. *Nihon Ronen Igakkai Zasshi.* 2003  
11 428 Mar;40(2):85-94. Review. Article in Japanese.
- 12 429 27. Nevitt MC, Cummings SR, Kidd S, Black D. Risk factors for recurrent nonsyncopal falls. A prospective study. *JAMA.*  
13 430 1989 May 12;261(18):2663-8.
- 14 431 28. Woolcott JC, Richardson KJ, Wiens MO, Patel B, Marin J, Khan KM, Marra CA. Meta-analysis of the impact of 9  
15 432 medication classes on falls in elderly persons. *Arch Intern Med.* 2009 Nov 23;169(21):1952-60.  
16 433  
17 434  
18 435  
19 436  
20 437  
21 438  
22 439  
23 440  
24 441  
25 442

## Tables

Table 1. Baseline Details of the study population.

| Demographic factors            | n (%)      |
|--------------------------------|------------|
| <b>Gender</b>                  |            |
| Male                           | 432(43.2)  |
| Female                         | 568(56.8)  |
| <b>Age group</b>               |            |
| 65-75                          | 648(64.8)  |
| 75-85                          | 262(26.2)  |
| >85                            | 90(9.0)    |
| <b>Weight Status(BMI)</b>      |            |
| Underweight(<18.5)             | 124(12.4)  |
| Normal(18.5-22.9)              | 340(34.0)  |
| Overweight(23-24.9)            | 188(18.8)  |
| Pre Obese(25-29.9)             | 264(26.4)  |
| Obese(>30)                     | 84(8.4)    |
| <b>Education</b>               |            |
| Graduate and above             | 132(13.2)  |
| Diploma / Pre-degree           | 85(8.5)    |
| Middle class / Primary         | 657(65.7)  |
| Illiterate                     | 126(12.6)  |
| <b>House Hold</b>              |            |
| Living with family / caretaker | 820 (82.0) |
| Living alone during daytime    | 145 (14.5) |
| Living alone                   | 35 (3.5)   |
| <b>Domicile</b>                |            |

|       |           |
|-------|-----------|
| Urban | 700(70.0) |
| Rural | 300(30.0) |

443

444

445

446

447

448

449

450

451

452

453

454

**Table.2. Association of falls with baseline variables – bivariate comparisons**

| Risk factors<br>n(%)                       | Prospective falls |               | OR (95% CI)      | P value |
|--------------------------------------------|-------------------|---------------|------------------|---------|
|                                            | No Fall<br>n (%)  | Fall<br>n (%) |                  |         |
| <b>Gender</b>                              |                   |               |                  |         |
| Men [432(43.2)]                            | 365(84.5)         | 67(15.5)      | 1.68(1.21-2.33)  | 0.002   |
| Women [568(56.8)]                          | 434(76.4)         | 134(23.6)     |                  |         |
| <b>Age Group in years</b>                  |                   |               |                  |         |
| 65-75 [648(64.8)]                          | 528(81.5)         | 120(18.5)     | 1.14 (0.80-1.64) | 0.468   |
| 75-85 [262(26.2)]                          | 208(79.4)         | 54(20.6)      |                  |         |
| >85 [90(9.0)]                              | 63(70.0)          | 27(30.0)      |                  |         |
| <b>Diabetes [342(34.2)]</b>                |                   |               |                  |         |
| No                                         | 532(80.9)         | 126(19.1)     | 1.19(0.86-1.63)  | 0.298   |
| Yes                                        | 267(78.1)         | 75(21.9)      |                  |         |
| <b>Hypertension (768(76.8))</b>            |                   |               |                  |         |
| No                                         | 181(78.0)         | 51(22.0)      | 0.86(0.60-1.23)  | 0.414   |
| Yes                                        | 618(80.5)         | 150(19.5)     |                  |         |
| <b>Asthma or COPD (225(22.5))</b>          |                   |               |                  |         |
| No                                         | 622(80.3)         | 153(19.7)     | 1.10(0.77-1.59)  | 0.600   |
| Yes                                        | 177(78.7)         | 48(21.3)      |                  |         |
| <b>Coronary Artery Disease (201(20.1))</b> |                   |               |                  |         |
| No                                         | 639(80.0)         | 160(20.0)     | 1.02(0.69-1.50)  | 0.906   |
| Yes                                        | 160(79.6)         | 41(20.4)      |                  |         |
| <b>Cerebrovascular Disease (53(5.3))</b>   |                   |               |                  |         |
| No                                         | 762(80.5)         | 185(19.5)     | 1.78(0.97-3.27)  | 0.060   |
| Yes                                        | 37(69.8)          | 16(30.2)      |                  |         |

|                                                   |     |           |           |                 |       |
|---------------------------------------------------|-----|-----------|-----------|-----------------|-------|
| <b>Alcohol (177(17.7))</b>                        | No  | 654(79.5) | 169(20.5) | 0.85(0.56-1.30) | 0.460 |
|                                                   | Yes | 145(81.9) | 32(18.1)  |                 |       |
| <b>Smoking (178(17.8))</b>                        | No  | 652(79.3) | 170(20.7) | 0.81(0.53-1.23) | 0.324 |
|                                                   | Yes | 147(82.6) | 31(17.4)  |                 |       |
| <b>Living Arrangement</b>                         |     |           |           |                 |       |
| Living with family/caretaker<br><b>(820(82))</b>  |     | 669(81.6) | 151(18.4) |                 |       |
| Living alone during daytime<br><b>(145(14.5))</b> |     | 109(75.2) | 36(24.8)  | 2.95(1.47-5.94) | 0.002 |
| Living alone <b>(35(3.5))</b>                     |     | 21(60.0)  | 14(40.0)  | 1.46(0.97-2.22) | 0.073 |

455

456

457

458

459

460

**Table 3. Association of falls with factors affecting locomotion – Bivariate comparisons**

| Risk factors                                            | Prospective falls   |                  | OR (95% CI)      | P value |
|---------------------------------------------------------|---------------------|------------------|------------------|---------|
|                                                         | No Fallers<br>n (%) | Fallers<br>n (%) |                  |         |
| <b>Parkinsonism(28(2.8))</b>                            | No                  | 782(80.5)        | 2.663(1.23-5.78) | 0.010   |
|                                                         | Yes                 | 17(60.7)         |                  |         |
| <b>Vertigo(388(38.8))</b>                               | No                  | 505(82.5)        | 1.51(1.10-2.06)  | 0.010   |
|                                                         | Yes                 | 294(75.8)        |                  |         |
| <b>Arthritis(281(28.1))</b>                             | No                  | 591(82.2)        | 1.62(1.17-2.25)  | 0.004   |
|                                                         | Yes                 | 208(74.0)        |                  |         |
| <b>Knee pain (565(56.5))</b>                            | No                  | 356(81.8)        | 1.24(0.91-1.70)  | 0.179   |
|                                                         | Yes                 | 443(78.4)        |                  |         |
| <b>Numbness and paraesthesia<br/>of feet(475(47.5))</b> | No                  | 432(82.3)        | 1.37(1.00-1.86)  | 0.048   |
|                                                         | Yes                 | 367(77.3)        |                  |         |
| <b>Urinary symptoms<br/>(316(31.6))</b>                 | No                  | 558(81.6)        | 1.38(0.99-1.90)  | 0.051   |
|                                                         | Yes                 | 241(76.3)        |                  |         |
| <b>Visual impairment<br/>(594(59.4))</b>                | No                  | 326(80.3)        | 1.04(0.76-1.43)  | 0.796   |
|                                                         | Yes                 | 473(79.6)        |                  |         |

16

|                                                                               |     |           |           |                    |        |
|-------------------------------------------------------------------------------|-----|-----------|-----------|--------------------|--------|
| <b>Not independent in Basic Activities of daily living (59(5.9))</b>          | Yes | 766(81.4) | 175(18.6) | 3.45(2.01-5.92)    | <0.001 |
|                                                                               | No  | 33(55.9)  | 26(44.1)  |                    |        |
| <b>Not independent in Instrumental activities of daily living (306(30.6))</b> | Yes | 572(82.4) | 122(17.6) | 1.63(1.18-2.25)    | 0.003  |
|                                                                               | No  | 227(74.2) | 79(25.8)  |                    |        |
| <b>Regular exercise or Yoga (342(34.2))</b>                                   | Yes | 281(82.2) | 61(17.8)  | 1.25(0.89-1.74)    | 0.198  |
|                                                                               | No  | 518(78.7) | 140(21.3) |                    |        |
| <b>History of falls in the previous 1 year (269(26.9))</b>                    | Yes | 182(67.7) | 87(32.3)  | 2.59 (1.87 – 3.58) | <0.001 |
|                                                                               | No  | 617(84.4) | 114(15.6) |                    |        |

461

462

463

464

**Table 4 Risk factors of falls in community dwelling elderly subjects**

| <b>Risk Factors</b>                            | <b>Odds Ratio (95% CI)</b> | <b>P value</b> |
|------------------------------------------------|----------------------------|----------------|
| <b>All Falls</b>                               |                            |                |
| Females                                        | 1.48 (1.05, 2.10)          | 0.027          |
| Movement disorders / Parkinson's Disease       | 2.26 (1.00, 5.05)          | 0.048          |
| Arthritis                                      | 1.48 (1.05, 2.09)          | 0.026          |
| Dependence in basic activities of daily living | 3.49 (2.00, 6.09)          | <0.001         |
| Not using antihypertensive medications         | 1.53 (1.10, 2.13)          | 0.012          |
| Living alone during daytime                    | 3.27 (1.59, 6.71)          | 0.001          |
| History of falls in previous year              | 2.25 (1.60, 3.15)          | <0.001         |
| <b>Recurrent Falls</b>                         |                            |                |
| Females                                        | 2.05 (1.07, 3.95)          | 0.031          |
| Dependence in basic activities of daily living | 3.63 (1.71, 7.70)          | 0.001          |
| History of falls in previous year              | 3.39 (1.89, 6.05)          | <0.001         |

465

466

467

468

469

**Figure legends**

1  
2  
3 470  
4 471 Fig.1 Flowchart of the study design

5  
6 472  
7 473  
8 474  
9  
10 475  
11 476  
12

13 477 **Contributorship statement** :-

14 478 Divyamol K S and Priya Vijayakumar conceptualised the original idea. Divyamol K S and  
15  
16 479 Manu Raj did review of literature and planned, conducted analysed and prepared manuscript  
17  
18 480 of the research work. Priya Vijayakumar supervised the experiment and in final editing of the  
19  
20 481 article. Sumi Soman and Libin Antony was involved in data acquisition and analysis. Abish  
21  
22 482 Sudhakar and Conrad Kabali derived the models and analysed the data.  
23

24 483 **Data availability statement** :-

25  
26 484 All data relevant to the study are included in the article or uploaded as supplementary information.  
27  
28 485  
29 486  
30 487  
31  
32 488  
33  
34 489  
35  
36 490  
37  
38  
39  
40  
41  
42  
43  
44  
45  
46  
47  
48  
49  
50  
51  
52  
53  
54  
55  
56  
57  
58  
59  
60

## Figure

### Fig.1 Flowchart of the Study Design

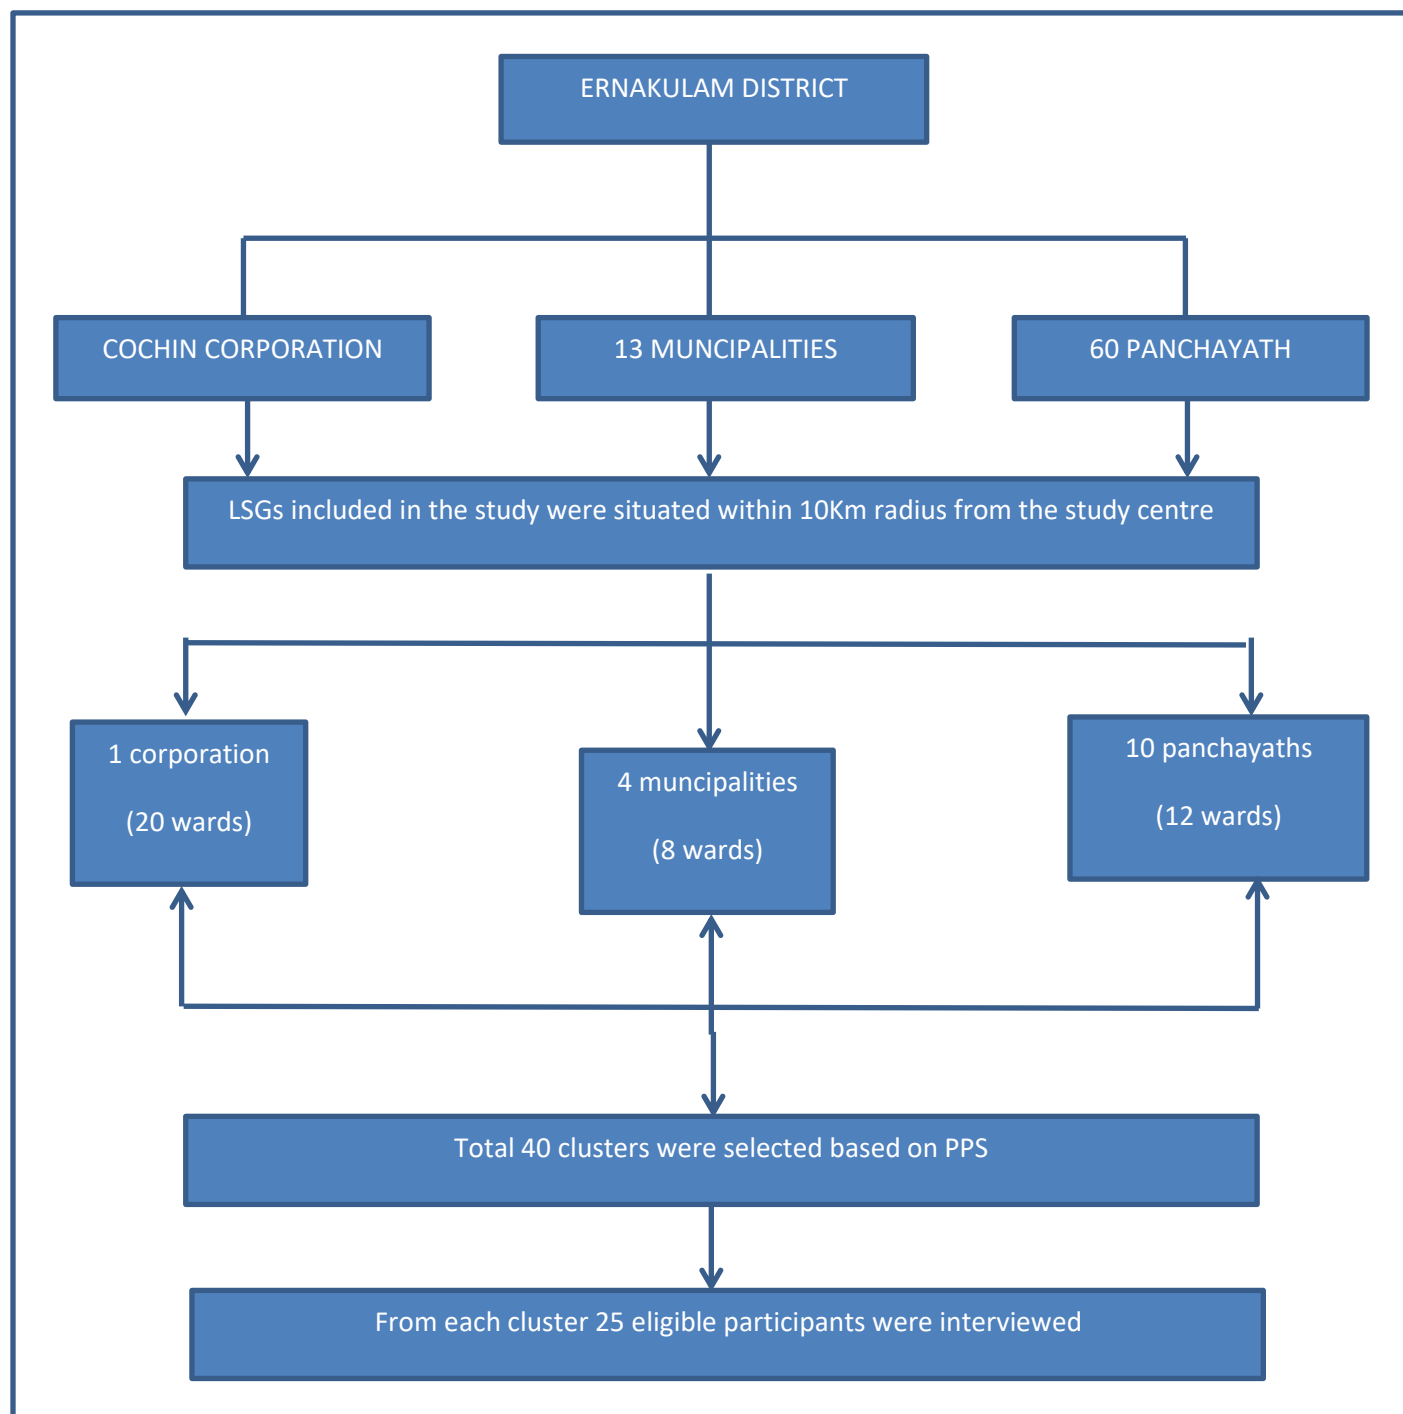

1 STROBE Statement—Checklist of items that should be included in reports of *cohort studies*

|    |                           | <b>Recommendation</b>                                                                                                                                                                                | <b>Action taken</b>                 |
|----|---------------------------|------------------------------------------------------------------------------------------------------------------------------------------------------------------------------------------------------|-------------------------------------|
| 2  |                           |                                                                                                                                                                                                      |                                     |
| 3  |                           |                                                                                                                                                                                                      |                                     |
| 4  | <b>Title and abstract</b> | 1 (a) Indicate the study's design with a commonly used term in the title or the abstract                                                                                                             | Page 4, Line 50 & 51                |
| 5  |                           | (b) Provide in the abstract an informative and balanced summary of what was done and what was found                                                                                                  | Page 4-5, Line 53-78                |
| 6  |                           |                                                                                                                                                                                                      |                                     |
| 7  |                           |                                                                                                                                                                                                      |                                     |
| 8  |                           |                                                                                                                                                                                                      |                                     |
| 9  | <b>Introduction</b>       |                                                                                                                                                                                                      |                                     |
| 10 | Background/rationale      | 2 Explain the scientific background and rationale for the investigation being reported                                                                                                               | Page 5, Line 92-95 & 100-106        |
| 11 | Objectives                | 3 State specific objectives, including any prespecified hypotheses                                                                                                                                   | Page 6, Line 119-122                |
| 12 |                           |                                                                                                                                                                                                      |                                     |
| 13 |                           |                                                                                                                                                                                                      |                                     |
| 14 |                           |                                                                                                                                                                                                      |                                     |
| 15 |                           |                                                                                                                                                                                                      |                                     |
| 16 | <b>Methods</b>            |                                                                                                                                                                                                      |                                     |
| 17 | Study design              | 4 Present key elements of study design early in the paper                                                                                                                                            | Page 6, Line 126                    |
| 18 | Setting                   | 5 Describe the setting, locations, and relevant dates, including periods of recruitment, exposure, follow-up, and data collection                                                                    | Page 6, Line 117-138                |
| 19 |                           |                                                                                                                                                                                                      |                                     |
| 20 |                           |                                                                                                                                                                                                      |                                     |
| 21 |                           |                                                                                                                                                                                                      |                                     |
| 22 | Participants              | 6 (a) Give the eligibility criteria, and the sources and methods of selection of participants. Describe methods of follow-up                                                                         | Page 6&7, Line 139-151              |
| 23 |                           | (b) For matched studies, give matching criteria and number of exposed and unexposed                                                                                                                  | Not Applicable                      |
| 24 |                           |                                                                                                                                                                                                      |                                     |
| 25 |                           |                                                                                                                                                                                                      |                                     |
| 26 |                           |                                                                                                                                                                                                      |                                     |
| 27 |                           |                                                                                                                                                                                                      |                                     |
| 28 | Variables                 | 7 Clearly define all outcomes, exposures, predictors, potential confounders, and effect modifiers. Give diagnostic criteria, if applicable                                                           | Page 7, Line 154-165                |
| 29 |                           |                                                                                                                                                                                                      |                                     |
| 30 |                           |                                                                                                                                                                                                      |                                     |
| 31 |                           |                                                                                                                                                                                                      |                                     |
| 32 | Data sources/measurement  | 8* For each variable of interest, give sources of data and details of methods of assessment (measurement). Describe comparability of assessment methods if there is more than one group              | Page 7, Line 160-177                |
| 33 |                           |                                                                                                                                                                                                      |                                     |
| 34 |                           |                                                                                                                                                                                                      |                                     |
| 35 |                           |                                                                                                                                                                                                      |                                     |
| 36 |                           |                                                                                                                                                                                                      |                                     |
| 37 | Bias                      | 9 Describe any efforts to address potential sources of bias                                                                                                                                          | Page 7, Line 147-151&170-174        |
| 38 |                           |                                                                                                                                                                                                      |                                     |
| 39 |                           |                                                                                                                                                                                                      |                                     |
| 40 | Study size                | 10 Explain how the study size was arrived at                                                                                                                                                         | Page 6&7, Line 131-138              |
| 41 | Quantitative variables    | 11 Explain how quantitative variables were handled in the analyses. If applicable, describe which groupings were chosen and why                                                                      | Page 8, Line 180-190                |
| 42 |                           |                                                                                                                                                                                                      |                                     |
| 43 |                           |                                                                                                                                                                                                      |                                     |
| 44 |                           |                                                                                                                                                                                                      |                                     |
| 45 | Statistical methods       | 12 (a) Describe all statistical methods, including those used to control for confounding                                                                                                             | Page 8, Line 181-186                |
| 46 |                           | (b) Describe any methods used to examine subgroups and interactions                                                                                                                                  | Not done                            |
| 47 |                           | (c) Explain how missing data were addressed                                                                                                                                                          | No missing data was encountered     |
| 48 |                           | (d) If applicable, explain how loss to follow-up was addressed                                                                                                                                       | No Loss to follow up was reported   |
| 49 |                           | (e) Describe any sensitivity analyses                                                                                                                                                                | Not Applicable                      |
| 50 |                           |                                                                                                                                                                                                      |                                     |
| 51 |                           |                                                                                                                                                                                                      |                                     |
| 52 |                           |                                                                                                                                                                                                      |                                     |
| 53 |                           |                                                                                                                                                                                                      |                                     |
| 54 |                           |                                                                                                                                                                                                      |                                     |
| 55 | <b>Results</b>            |                                                                                                                                                                                                      |                                     |
| 56 | Participants              | 13 (a) Report numbers of individuals at each stage of study—eg numbers potentially eligible, examined for eligibility, confirmed eligible, included in the study, completing follow-up, and analysed | Page 9, Line 201-203<br>Refer Fig 1 |
| 57 |                           | (b) Give reasons for non-participation at each stage                                                                                                                                                 | Not Applicable                      |
| 58 |                           |                                                                                                                                                                                                      |                                     |
| 59 |                           |                                                                                                                                                                                                      |                                     |
| 60 |                           |                                                                                                                                                                                                      |                                     |



|                          |    |                                                                                                                                                                                                              |                          |
|--------------------------|----|--------------------------------------------------------------------------------------------------------------------------------------------------------------------------------------------------------------|--------------------------|
|                          |    | (c) Consider use of a flow diagram                                                                                                                                                                           | Figure 1                 |
| Descriptive data         | 14 | (a) Give characteristics of study participants (eg demographic, clinical, social) and information on exposures and potential confounders                                                                     | Page 9, Line 201-214     |
|                          | *  | (b) Indicate number of participants with missing data for each variable of interest                                                                                                                          | No missing data          |
|                          |    | (c) Summarise follow-up time (eg, average and total amount)                                                                                                                                                  | Page 8, Line 173-176     |
| Outcome data             | 15 | Report numbers of outcome events or summary measures over time                                                                                                                                               | Page 9, Line 216-226     |
| Main results             | 16 | (a) Give unadjusted estimates and, if applicable, confounder-adjusted estimates and their precision (eg, 95% confidence interval). Make clear which confounders were adjusted for and why they were included | Page 10, Line 228-257    |
|                          |    | (b) Report category boundaries when continuous variables were categorized                                                                                                                                    | Not applicable           |
|                          |    | (c) If relevant, consider translating estimates of relative risk into absolute risk for a meaningful time period                                                                                             | Not applicable           |
| Other analyses           | 17 | Report other analyses done—eg analyses of subgroups and interactions, and sensitivity analyses                                                                                                               | Page 11, Line 259-278    |
| <b>Discussion</b>        |    |                                                                                                                                                                                                              |                          |
| Key results              | 18 | Summarise key results with reference to study objectives                                                                                                                                                     | Page 11-12, Line 280-300 |
| Limitations              | 19 | Discuss limitations of the study, taking into account sources of potential bias or imprecision. Discuss both direction and magnitude of any potential bias                                                   | Page 13, Line 349-351    |
| Interpretation           | 20 | Give a cautious overall interpretation of results considering objectives, limitations, multiplicity of analyses, results from similar studies, and other relevant evidence                                   | Page 12&13, Line 301-343 |
| Generalisability         | 21 | Discuss the generalisability (external validity) of the study results                                                                                                                                        | Page 13, Line 346-349    |
| <b>Other information</b> |    |                                                                                                                                                                                                              |                          |
| Funding                  | 22 | Give the source of funding and the role of the funders for the present study and, if applicable, for the original study on which the present article is based                                                | Page 14, Line 356-357    |

# BMJ Open

## Incidence and risk factors for falls among community dwelling elderly subjects on a one year follow up - A prospective cohort study from Ernakulam, Kerala, India

|                                 |                                                                                                                                                                                                                                                                                                                                                                                                                                                                                                                                                                                                                                                 |
|---------------------------------|-------------------------------------------------------------------------------------------------------------------------------------------------------------------------------------------------------------------------------------------------------------------------------------------------------------------------------------------------------------------------------------------------------------------------------------------------------------------------------------------------------------------------------------------------------------------------------------------------------------------------------------------------|
| Journal:                        | <i>BMJ Open</i>                                                                                                                                                                                                                                                                                                                                                                                                                                                                                                                                                                                                                                 |
| Manuscript ID                   | bmjopen-2019-033691.R2                                                                                                                                                                                                                                                                                                                                                                                                                                                                                                                                                                                                                          |
| Article Type:                   | Original research                                                                                                                                                                                                                                                                                                                                                                                                                                                                                                                                                                                                                               |
| Date Submitted by the Author:   | 13-Mar-2020                                                                                                                                                                                                                                                                                                                                                                                                                                                                                                                                                                                                                                     |
| Complete List of Authors:       | Sasidharan, Divyamol; Amrita Institute of Medical Sciences and Research Centre, Geriatric Medicine; Government of Goa Directorate of Health Services, Geriatric Medicine<br>Vijayakumar, Priya; Amrita Vishwa Vidyapeetham, Geriatric Medicine<br>Raj, Manu; Amrita Institute of Medical Sciences and Research Centre, pediatrics & pediatric cardiology<br>Soman, Sumi ; Amrita Vishwa Vidyapeetham, Public Health Research<br>Antony, Libin; Amrita Vishwa Vidyapeetham, Public Health Research<br>Sudhakar, Abish; Amrita Institute of Medical Sciences and Research Centre, Pediatric Cardiology<br>Kabali, Conrad; Health Quality Ontario, |
| <b>Primary Subject Heading</b>: | Geriatric medicine                                                                                                                                                                                                                                                                                                                                                                                                                                                                                                                                                                                                                              |
| Secondary Subject Heading:      | Epidemiology, Public health                                                                                                                                                                                                                                                                                                                                                                                                                                                                                                                                                                                                                     |
| Keywords:                       | Falls, Elderly, Community based study, Cohort Study, Kerala                                                                                                                                                                                                                                                                                                                                                                                                                                                                                                                                                                                     |
|                                 |                                                                                                                                                                                                                                                                                                                                                                                                                                                                                                                                                                                                                                                 |

SCHOLARONE™  
Manuscripts



I, the Submitting Author has the right to grant and does grant on behalf of all authors of the Work (as defined in the below author licence), an exclusive licence and/or a non-exclusive licence for contributions from authors who are: i) UK Crown employees; ii) where BMJ has agreed a CC-BY licence shall apply, and/or iii) in accordance with the terms applicable for US Federal Government officers or employees acting as part of their official duties; on a worldwide, perpetual, irrevocable, royalty-free basis to BMJ Publishing Group Ltd ("BMJ") its licensees and where the relevant Journal is co-owned by BMJ to the co-owners of the Journal, to publish the Work in this journal and any other BMJ products and to exploit all rights, as set out in our [licence](#).

The Submitting Author accepts and understands that any supply made under these terms is made by BMJ to the Submitting Author unless you are acting as an employee on behalf of your employer or a postgraduate student of an affiliated institution which is paying any applicable article publishing charge ("APC") for Open Access articles. Where the Submitting Author wishes to make the Work available on an Open Access basis (and intends to pay the relevant APC), the terms of reuse of such Open Access shall be governed by a Creative Commons licence – details of these licences and which [Creative Commons](#) licence will apply to this Work are set out in our licence referred to above.

Other than as permitted in any relevant BMJ Author's Self Archiving Policies, I confirm this Work has not been accepted for publication elsewhere, is not being considered for publication elsewhere and does not duplicate material already published. I confirm all authors consent to publication of this Work and authorise the granting of this licence.

1  
2  
3  
4 1 **Type of article:** Original

5 2 **Title of the article:** **Incidence and risk factors for falls among community dwelling elderly**  
6  
7 3 **subjects on a one year follow up - A prospective cohort study from Ernakulam, Kerala,**  
8  
9 4 **India**

10  
11 5 **Running title :** Risk factors for falls among community dwelling elderly subjects in Kerala

12  
13 6 **Contributors**

- 14  
15 7 1. Divyamol K Sasidharan, MD (Geriatric Medicine), [jisbbb87@gmail.com](mailto:jisbbb87@gmail.com), Geriatric  
16 8 Medicine Department, Amrita Institute of Medical Science, Kochi, Kerala, India  
17  
18 9 2. Priya Vijayakumar, MD (General Medicine), [divz64@gmail.com](mailto:divz64@gmail.com), Geriatric Medicine  
19 10 Department, Amrita Institute of Medical Science, Kochi, Kerala, India  
20  
21 11 3. Manu Raj, DNB (Pediatric Cardiology), [drmanuraj@gmail.com](mailto:drmanuraj@gmail.com), Public Health Research  
22 12 Department, Amrita Institute of Medical Science, Kochi, Kerala, India  
23  
24 13 4. Sumi Soman, MSc Nursing, [sumisoman90@gmail.com](mailto:sumisoman90@gmail.com), Public Health Research  
25 14 Department, Amrita Institute of Medical Science, Kochi, Kerala, India  
26  
27 15 5. Libin Antony P F, Msc Nursing, [libinantony.antony@gmail.com](mailto:libinantony.antony@gmail.com), Public Health Research  
28 16 Department, Amrita Institute of Medical Science, Kochi, Kerala, India  
29  
30 17 6. Abish Sudhakar, MA Sociology, [abishsudhakar@aims.amrita.edu](mailto:abishsudhakar@aims.amrita.edu), Paediatric  
31 18 Cardiology, Amrita Institute of Medical Science, Kochi, Kerala, India  
32  
33 19 7. Conrad Kabali, PhD Biostatistics, [ckabali@gmail.com](mailto:ckabali@gmail.com), Division of  
34 20 Epidemiology, University of Toronto Dalla Lana School of Public Health, Toronto, Ontario,  
35 21 Canada  
36  
37  
38  
39  
40  
41  
42  
43

44 23 **Department(s) and institution(s):** Department of Geriatric Medicine, Public Health  
45 24 Research Department, Amrita Institute of Medical Science, Kochi, Kerala, India  
46  
47  
48  
49

50 26 **Corresponding Author:**

51 27 Name : Priya Vijayakumar  
52  
53 28 Address : Clinical Professor  
54  
55 29 Department of Geriatric Medicine  
56  
57 30 Amrita Institute of Medical Sciences, Kochi  
58  
59  
60

1  
2  
3  
4 31 Phone numbers : 9995653009  
5  
6 32 E-mail address : divz64@gmail.com

7  
8 33 Total number of pages: 18 Word counts  
9  
10 34 for abstract: 267  
11  
12 35 for the text: 3680

13  
14 36 Source(s) of support: Nil

15  
16 37 Presentation at a meeting: Nil

17  
18 38 Total number of photographs: Nil

19  
20 39

21  
22 40 **Competing Interests:** Authors have no competing interests.

23  
24 41

25  
26 42 **Funding:**

27  
28 43 This research received no specific grant from any funding agency in the public, commercial  
29  
30 44 or not-for-profit sectors.

31  
32 45 **Acknowledgement:** We are thankful for the valuable inputs provided by Dr.Sunil K S,  
33  
34 46 Mrs.Ramya Raju, Mrs.Georgina P, Dr.Jishnu S Lalu during planning, data collection and  
35  
36 47 analysis stage.

37  
38 48

39  
40 49 **Title:**

41  
42 50 **Incidence and risk factors for falls among community dwelling elderly subjects on a one**  
43  
44 51 **year follow up - A prospective cohort study from Ernakulam, Kerala, India**

45  
46 52 **Abstract**

47  
48 53 **Objectives:** There is limited knowledge regarding epidemiology and risk of falls in elderly  
49  
50 54 living in low and middle income countries. The current study aims to report the incidence of  
51  
52 55 falls among free living elderly population from Kerala, India.

53  
54 56 **Design:** Prospective cohort study with stratified random cluster sampling.

55  
56 57 **Setting:** The study location was Ernakulam, Kerala, India. We collected information via  
57  
58 58 house visits using a questionnaire. The subjects were followed up prospectively for one year  
59  
60 59 by phone at three monthly intervals and missing subjects by house visits.

60 **Participants:** Community dwelling elderly above 65years of age.

61 **Results:** We recruited a total of 1000 participants. A total of 201(20.1%) subjects reported a  
62 fall during follow-up. The incidence rate of falls was 31 (95% CI 27.7, 34.6) per 100 person  
63 years. Female sex (OR 1.48, 95% CI 1.05, 2.10,  $p = 0.027$ ), movement disorders including  
64 parkinsonism (OR 2.26, 95% CI, 1.00, 5.05,  $p=0.048$ ), arthritis (OR 1.48, 95% CI 1.05, 2.09,  
65  $p=0.026$ ), dependence in basic activities of daily living (OR, 3.49, 95% CI 2.00, 6.09,  
66  $p<0.001$ ), not using antihypertensive medications (OR, 1.53, 95% CI 1.10, 2.13,  $p=0.012$ ),  
67 living alone during daytime (OR 3.27, 95% CI 1.59, 6.71,  $p=0.001$ ) and a history of falls in  
68 the previous year (OR, 2.25, 95% CI 1.60, 3.15,  $p<0.001$ ) predicted a fall in the following  
69 year.

70 **Conclusions:** One in five community dwelling elderly fall annually and one in four who fall  
71 are prone to fall again in the next year. Interventions targeting falls among elderly need to  
72 focus on modifiable risk factors like living alone during daytime, movement disorders,  
73 arthritis and dependence on basic activities of daily living.

74 **Keywords:** Falls, Elderly, Community based study, Cohort Study, Kerala

#### 75 **Strengths and limitations of this study:**

- 76
- 77 • The study was a prospective cohort study design with large sample size (n=1000).
- 78 • The study population represented both urban and rural population from different  
79 Socio Economic Scale levels.
- 80 • None of the participants were lost to follow up and a fall diary was used to avoid  
81 recall bias.
- 82 • The data is from a single study setting.
- 83 • The study has a short period of follow up (one year).
- 84

#### 85 **Introduction**

86 Globally, there are an estimated 962 million people aged 60 or over, comprising 13 per cent  
87 of the total population.<sup>1</sup> Unintentional injuries are reported to be the fifth leading cause of  
88 death globally in this population and falls constitute two out of every three deaths in this  
89 category.<sup>2</sup> The Kellogg International Working Group defined a fall as ‘unintentionally

1  
2  
3 90 coming to the ground or some lower level and other than as a consequence of sustaining a  
4  
5 91 violent blow, loss of consciousness, sudden onset of paralysis as in stroke or an epileptic  
6  
7 92 seizure'.<sup>3</sup>  
8

9 93 Already over 70 % of the world's older population live in developing countries. The  
10  
11 94 proportion will increase in coming decades due to increasing longevity in all regions of the  
12  
13 95 world.<sup>4</sup>The incidence of falls as well as the consequences of falls have been higher in lower  
14  
15 96 and middle income countries as compared to high income countries.<sup>5-7</sup> Each year an estimated  
16  
17 97 646 000 individuals die from falls globally of which over 80% are in low- and middle-income  
18  
19 98 countries.<sup>5</sup> In 2010, for example, years lived with disability (YLDs) due to reported falls were  
20  
21 99 631.2 per 100,000 (population) in India and 674.4 per 100,000 in China, compared with 472.2  
22  
23 100 per 100,000 in the United States.<sup>6</sup> In that year, the global share of YLDs due to falls in adults  
24  
25 101 aged 50 to 59 years was 66 % in developing countries and 34 % in high income developed  
26  
27 102 countries.<sup>7</sup> Fall preventing interventions are not that freely available in many parts of low and  
28  
29 103 middle income countries.<sup>8</sup>  
30

31 104  
32 105 Many prospective population-based studies have examined the epidemiology of falls in the  
33  
34 106 community dwelling elderly across different settings. The reported incidence rates show wide  
35  
36 107 variability from as low as 29% to as high as 40% in this population.<sup>9-14</sup> Various studies done  
37  
38 108 in India too have reported the prevalence of falls in community dwelling elderly ranging from  
39  
40 109 13-53%.<sup>15-18</sup> The incidence of recurrent falls (more than two episodes per calendar year was  
41  
42 110 reported to be 11 to 21% by Lord et al.<sup>9</sup>  
43

44 111  
45 112 The risk factors for falls in the elderly as reported by Lord et al can be grouped into seven  
46  
47 113 major categories.<sup>9</sup>These include socio-demographic factors, balance and mobility factors,  
48  
49 114 sensory and neuromuscular factors, psychological factors, medical factors, medication use,  
50  
51 115 and environmental factors.<sup>9</sup> A recent meta-analysis by Deandrea et al pooled data from 74  
52  
53 116 prospective cohort studies that reported risk factors for prospective falls among community  
54  
55 117 dwelling elders.<sup>19</sup> A prior history of falls, gait problems, walking aid use, vertigo, parkinson  
56  
57 118 disease and anti-epileptic drug use were the dominant reasons for prospective falls in this age  
58  
59 119 group.<sup>19</sup>  
60

1  
2  
3 120 The primary objective of our study was to report the incidence of falls in community  
4  
5 121 dwelling elderly population from Ernakulam, Kerala, India through a year-long prospective  
6  
7 122 follow up schedule. The secondary objective was to identify factors that can predict a risk for  
8  
9 123 future fall in community dwelling elders.

10  
11 124

12  
13 **Methods:**

14  
15 126 ***Selection and Description of participants:***

16  
17  
18 127 **Design & Setting:** The current study is a community based prospective cohort study that was  
19  
20 128 conducted in an area within 10 km radius from the study centre (Amrita Institute of Medical  
21  
22 129 Sciences and Research Centre, Kochi, Kerala). The study was conducted over a period of  
23  
24 130 three years (Nov 2014 to Nov 2017). This circular area included 12 panchayats, four  
25  
26 131 municipalities and one corporation. The study area comes under Ernakulam district of Kerala,  
27  
28 132 South India.

29 133 We calculated the sample size using a previously published study by Mitchell-Fearson et al  
30  
31 134 which reported 21.7% prevalence for falls in the elderly.<sup>20</sup> We selected an alpha of 0.05 and  
32  
33 135 an allowable error of 20% giving us a minimum sample size of 347 subjects. The design  
34  
35 136 effect for the sampling method (multistage stratified random cluster sampling) was calculated  
36  
37 137 using a pilot of ten clusters (cluster size k=25) that provided an Intra Class Correlation (ICC)  
38  
39 138 of 0.023. The sample size adjusted for design effect was 539 (inflation factor of 1.552). We  
40  
41 139 enrolled a total of 1000 participants anticipating significant sub group differences within the  
42  
43 140 study sample.

44 141 **Participants:** We used stratified random cluster sampling method to select the participants.  
45  
46 142 The sample was stratified at two levels, rural urban (level 1) and at the level of individual  
47  
48 143 local self-governing units (LSGs, level 2). A total of 40 clusters using Probability  
49  
50 144 proportional to size technique were selected randomly from the list of all available clusters  
51  
52 145 within the defined geographical area. Each cluster was from an individual electoral ward  
53  
54 146 within the LSGs. We selected 25 participants from each cluster. In each cluster, a random  
55  
56 147 starting point was selected and households were visited in a sequential manner by the  
57  
58 148 principal investigator and staff till 25 subjects were recruited. A flowchart on the study  
59  
60 149 design used in the present study is shown in figure.1. The inclusion criteria included (i)



1  
2  
3 150 minimum age of 65 years or more (ii) ambulant physical status (iii) intention to stay in the  
4 151 study area for a minimum of one year after assessment and (iv) ability to communicate in  
5 152 English/Malayalam language. The exclusion criteria included complete dependence for day  
6 153 to day activities.

7  
8  
9  
10  
11 154 **Operational definitions:**

12  
13 155 Fall was defined as suggested by The Kellogg International Working Group as mentioned in  
14 156 the introduction.<sup>3</sup>

15  
16  
17 157 A recurrent fall was defined as fall of two or more times during the follow up period of one  
18 158 year.<sup>9</sup>

19  
20  
21  
22 159 **Patient and public involvement:** Patients and the public were not specifically involved in  
23 160 the planning and execution of this study. However, they were informed of the need of the  
24 161 study and quarterly follow up was done telephonically.

25  
26  
27  
28 162 ***Technical Information:***

29  
30  
31 163 A study questionnaire was prepared after a detailed literature review of studies related to falls  
32 164 in the elderly. The study questionnaire included questions relating to the socio-demographic  
33 165 profile, comorbidities, physical activity, medication use and environmental assessment. This  
34 166 questionnaire was initially piloted over a small number of patients (n=50) and redundant  
35 167 questions were either removed or modified. The modified questionnaire was reviewed by  
36 168 subject experts and was approved for use in the full study.

37  
38  
39  
40  
41 169 All initial assessments were done at the participant's home. The research team (PI, two  
42 170 nurses) visited all recruited subjects at their home premises. The study questionnaire was  
43 171 administered by the PI by means of a face to face interview during house visits. In addition,  
44 172 height, weight and blood pressure readings were taken by the trained staff (nurses) that  
45 173 accompanied the PI. All subjects were advised to keep a fall diary in which they were  
46 174 instructed to note down any incidence of fall along with the date and time of fall, what the  
47 175 patient was doing when he fell, what caused the fall, whether it was a witnessed fall or not  
48 176 and whether the fall had any consequences or complications. A three monthly follow up was  
49 177 done by telephonic conversation with enrolled subjects for one year from first visit. Those  
50 178 who were not available over the phone were revisited via house visits by the research staff

1  
2  
3 179 and hence no missing data were encountered in the study. In addition, the fall diaries of those  
4  
5 180 who reported a fall from the same cluster were reviewed during these house visits. The data  
6  
7 181 collection period was from August 2015 to April 2017.

### 8 9 182 ***Statistics:***

10  
11 183 We summarized demographic and social-economic variables to characterize the study  
12  
13 184 population (Table 1). We presented the mean and standard deviation for normally distributed  
14  
15 185 continuous variables. All categorical variables are expressed in number and percentages. We  
16  
17 186 used Chi square test to examine the association of categorical risk factors with prospective  
18  
19 187 falls. All individual factors with a p value of <0.2 for association on bivariate analysis was  
20  
21 188 selected for multivariate analysis. Multiple binary logistic regression was used to construct  
22  
23 189 the prediction model for prospective falls. We selected Logistic regression after verifying  
24  
25 190 lack of over-dispersion using the Pearson and deviance methods. The cut-off point for  
26  
27 191 statistical significance was set at an  $\alpha$ -level of 5%. We reported the adjusted Odds Ratios  
28  
29 192 (aOR) with 95% confidence intervals. We encountered no missing data in the study.  
30  
31 193 Statistical analysis was done using IBM SPSS Statistics 20 Windows (SPSS Inc., Chicago,  
32  
33 194 USA).

### 33 195 ***Ethical approval:***

34  
35  
36 196 We collected written informed consent from the consenting subjects before recruitment to the  
37  
38 197 study and the same was documented for future reference. The consent contained the title,  
39  
40 198 purpose, methods employed in the study, benefits to the subject as well as family and the  
41  
42 199 interest of the respondent to participate on a voluntary basis to the study. The confidentiality  
43  
44 200 of the study during the analysis was also mentioned in the consent. The consent process and  
45  
46 201 study protocol was approved by the Institutional Ethics Committee of Amrita Institute of  
47  
48 202 Medical Sciences and Research centre. (Institutional Ethics Committee Registration Number:  
49  
50 203 ECR/129/Inst/KL/2013).

## 50 204 **Results**

### 51 205 ***Baseline Characteristics of the study population***

52  
53 206 We recruited a total of 1000 participants from 40 individual pre-designated clusters spread  
54  
55 207 across a circular geographical area with the study institution as the centre point of which 568  
56  
57 208 (56.8%) were female. The distribution of gender, age categories, weight status, education  
58  
59  
60

1  
2  
3 209 level, household living pattern and area of domicile are presented in Table 1. The mean age  
4 210 of the study subjects was 72.7(7.2) years. Among study participants, 568 (56.8%) were  
5 211 female, 87.4% were literate and 82% lived with family or caretakers. A total of 348 (34.8%)  
6 212 were either pre-obese or obese as per Asian Criteria of BMI classification.<sup>21</sup> The morbidity  
7 213 profile of the study population was published earlier.<sup>22</sup> The self-reported prevalence of  
8 214 diabetes(DM), coronary artery diseases(CAD) and cerebrovascular accidents (CVA) were  
9 215 34.2%, 20.1%&5.3% respectively. Among study subjects, 768 (76.8%) were hypertensive as  
10 216 documented either by high values on house visit measurement or by current treatment for  
11 217 hypertension. Among hypertensives, a total of 528 subjects (68.8%) reported taking  
12 218 treatment for hypertension and remaining 240(31.2%) were newly detected during the  
13 219 baseline evaluation of the study.

### 220 *Incidence of falls in the study population*

221 A total of 201(20.1%) subjects reported a fall during the prospective follow up period of one  
222 year. The total fall episodes during the follow up period were 301. The overall incidence rate  
223 of falls was 31 (95% CI 27.7, 34.6) per 100 person years. The corresponding figures for  
224 elderly men and women separately were 21.2 (95% CI 18.5, 24.2) & 38.3 (95% CI, 34.6,  
225 42.3) respectively. The stratified incidence rates for age groups 65-75, 75-85 & more than 85  
226 were 27.4, 36.8 and 41.1 per 100 person years respectively. Among participants, more  
227 women reported a fall compared to men (23.6% v/s 15.5%, p, 0.002). In the age stratified  
228 groups, 27(30.0%) subjects in the age group >85 years reported a fall in the follow up period,  
229 compared to 54(20.6%) in the age group 75-85 years and 120(18.5%) in the 65-75 years  
230 group. (p 0.038). In addition, 53 (5.3 %) people sustained recurrent falls (two or more falls)  
231 during the follow up.

### 232 *Factors associated with prospective falls.*

233 The association of baseline factors with a prospective history of falls during the follow up  
234 period is presented in **Table 2** as unadjusted bivariate comparisons. Among all baseline  
235 variables, only gender and living arrangement showed a significant association with a  
236 prospective history of falls on bivariate comparisons. Females had a higher risk of fall when  
237 compared to males (OR 1.68, 95% CI, 1.21, 2.33. p 0.002). Those living alone during  
238 daytime also had a higher risk of falls when compared to those living with family/caretaker  
239 (OR 2.95, 95% CI, 1.47, 5.94. p 0.002). The association of prospective falls with factors

1  
2  
3 240 affecting locomotion was explored by bivariate analysis and is presented in **Table 3**. Among  
4  
5 241 the factors affecting locomotion, only parkinsonism (OR 2.66, 95% CI, 1.23, 5.78. p 0.010),  
6  
7 242 vertigo (OR 1.51, 95% CI, 1.10, 2.06. p 0.010), arthritis (OR 1.62, 95% CI, 1.17, 2.25. p  
8  
9 243 0.004), numbness and paraesthesia of feet (OR 1.37, 95% CI, 1.00, 1.86. p 0.048) dependence  
10  
11 244 in basic activities of daily living (OR 3.45, 95% CI, 2.01, 5.92. p <0.001) and dependence in  
12  
13 245 instrumental activities of daily living (OR 1.63, 95% CI, 1.18, 2.25. p 0.003) showed  
14  
15 246 significant associations with prospective falls on bivariate comparisons. A history of falls in  
16  
17 247 the preceding year also had a higher risk for prospective falls (OR 2.59, 95% CI, 1.87, 3.58. p  
18  
19 248 <0.001).

20  
21 250 Among baseline factors only gender showed an association with recurrent falls on bivariate  
22  
23 251 comparisons (OR 2.44, 95% CI, 1.29, 4.63. p 0.005). Among factors affecting locomotion  
24  
25 252 dependence in basic activities of daily living (OR 5.00, 95% CI, 2.38, 10.10. p <0.001),  
26  
27 253 dependence in instrumental activities of daily living (OR 1.79, 95% CI, 1.03, 3.12. p = 0.038)  
28  
29 254 and a history of falls in the preceding year (OR 4.20, 95% CI, 2.38, 7.39 p <0.001) showed an  
30  
31 255 association with recurrent falls on bivariate comparisons.

32  
33 256  
34 257 In the study population, 474(47.4%) subjects reported taking anti-hypertensives, 277(27.7%)  
35  
36 258 reported taking anti diabetic medications and 69(6.9%) reported taking either  
37  
38 259 benzodiazepines or other sedative drugs. There was no significant association for prospective  
39  
40 260 falls with use of anti-hypertensive medications (OR 0.77, 95% CI 0.57, 1.06, p = 0.104), anti-  
41  
42 261 diabetic medications (OR 1.14, 95% CI 0.81, 1.60, p=0.446) or benzodiazepines/sedatives  
43  
44 262 (OR 1.56, 95% CI 0.90, 2.72, p=0.110) in bivariate comparisons.

### 263 ***Independent Risk Factors for prospective falls***

264 The final adjusted model with independent predictors of prospective falls in the elderly is  
265 presented as Table 4. The variables found to be significant(P value <0.2) in bivariate analysis  
266 with falls were age, sex, living arrangement, vertigo, parkinsonism, arthritis, urinary  
267 symptoms, constipation, knee pain, paraesthesia of feet, history of fall in the previous year,  
268 dependence in basic and instrumental activities of daily living, use of assistive devices for  
269 movement, cognitive impairment, depression, use of antihypertensive medications and  
270 benzodiazepines. The same were included in the final model construction. Among the factors  
271 examined in the logistic regression model, female sex (OR 1.48, 95% CI 1.05, 2.10, p =

1  
2  
3 272 0.027), parkinsonism (OR 2.26, 95% CI 1.00, 5.05, p=0.048), arthritis (OR 1.48, 95% CI  
4 273 1.05-2.09, p=0.026), dependence in basic activities of daily living (OR 3.49, 95% CI 2.00,  
5 274 6.09, p<0.001), not using antihypertensive medications (OR 1.53, 95% CI 1.10-2.13,  
6 275 p=0.012), living alone during the daytime (OR 3.27, 95% CI 1.59-6.71, p=0.001) and history  
7 276 of falls in the previous year (OR 2.59, 95% CI 1.87, 3.58, p<0.001) were found to be  
8 277 significantly associated with falls.

9  
10  
11  
12  
13  
14 278 The factors included to assess the independent risk factors of recurrent falls were, female sex,  
15 279 vertigo, parkinsonism, arthritis and dependence in basic and instrumental activities of daily  
16 280 living and history of falls in the previous year. From the above, the independent predictors for  
17 281 recurrent falls were female sex (OR 2.05, 95% CI 1.07, 3.95, p = 0.031), dependence in basic  
18 282 activities of daily living (OR 3.63, 95% CI 1.71, 7.70, p = 0.001), and history of falls in the  
19 283 previous year (OR 3.39, 95% CI 1.89, 6.05, p<0.001).

## 24 284 **Discussion**

25  
26  
27  
28 285 The current study provides details of fall episodes experienced by free living elderly from  
29 286 Kerala, India during a prospective follow up of one year. Approximately one in five elderly  
30 287 subjects in this age group reported a fall during the study period. There appears to be a sex  
31 288 based difference in the proportion that fell with one in four elderly women falling compared  
32 289 to one in six men during follow up. The results also suggest a dose response relationship  
33 290 between age and falls with more subjects falling in older age groups compared to relatively  
34 291 younger groups. In addition, every fourth person who fell reported one or more falls  
35 292 following the index fall episode during the study period.

36  
37  
38  
39  
40  
41  
42  
43 293 The independent predictors for falls in the elderly included female sex, parkinsonism and  
44 294 related movement disorders, arthritis, dependence in basic activities of daily living, not using  
45 295 antihypertensive medicines, living alone during daytime and a history of fall in the preceding  
46 296 year. The corresponding predictors for recurrent falls included female sex, dependence in  
47 297 basic activities of daily living and a history of fall in the preceding year. To our knowledge,  
48 298 this is the only prospective cohort study done in India that focussed on falls in free living  
49 299 elderly who were assessed in the community setting.

50  
51  
52  
53  
54  
55  
56 300 The incidence of falls in the elderly from our study appears to be at the lower end of the  
57 301 spectrum as reported by western studies (29% to 40%).<sup>9-14</sup> Interestingly, our results are more

1  
2  
3 302 similar to that reported by a prospective study among community dwelling elderly Chinese  
4  
5 303 subjects.<sup>23</sup> The incidence rate of falls in this study were 27.0, 32.4 and 22.0 per 100 person-  
6  
7 304 years for all elderly, women and men respectively. The proportion with recurrent falls in this  
8  
9 305 study was also similar to our study (4.75% v/s 5.3%).

10  
11 306 The risk factors for prospective falls in community dwelling elderly was examined by a  
12  
13 307 recent meta-analysis by Deandrea et al that pooled 74 prospective cohorts.<sup>19</sup> Most of the  
14  
15 308 prospective studies in the meta-analysis suggested that community dwelling elderly women  
16  
17 309 are at higher risk for falls compared to their male counterparts. The pooled estimates for falls  
18  
19 310 (OR 1.30, 95% CI, 1.18, 1.42) and recurrent falls (OR 1.34, 95% CI, 1.12, 1.60) in this meta-  
20  
21 311 analysis are in agreement with the current study.

22  
23 312 Several prospective studies have reported higher risk for falls among elderly patients with  
24  
25 313 Parkinsonism and/or related movement disorders similar to the current study. The meta-  
26  
27 314 analysis suggested an adjusted OR of 2.71 (95% CI, 1.08, 6.84) for falls and 2.84 (95% CI,  
28  
29 315 1.77, 4.58) for recurrent falls from five studies that looked for the same. Our study didn't  
30  
31 316 report any positive association between Parkinson's disease and recurrent falls, probably due  
32  
317 to the small number of recurrent fallers (5.3%) in the cohort.

33  
34 318 Our finding of high risk for falls among those elderly with arthritis is in concordance with  
35  
36 319 several other studies.<sup>24-27</sup> Together these studies suggest that elderly with arthritis and/or  
37  
38 320 chronic pain have a higher risk for falls. The GLOW cohort also reported a higher incidence  
39  
40 321 of falls and fractures in postmenopausal women with osteoarthritis compared to osteoarthritis  
41  
42 322 free peers.<sup>27</sup>

43  
44  
45 324 Several studies have reported that living alone during the daytime is a risk factor for falls in  
46  
47 325 the elderly as suggested by the current study.<sup>19</sup> The meta-analysis is also in agreement with  
48  
49 326 this observation (OR 1.33, 95% CI, 1.21, 1.45) after looking at data from 11 studies that  
50  
51 327 examined the same.

52  
53 328 Reduced BADL( Basic Activities of Daily Living) capability is also reported to be associated  
54  
55 329 with falls in the elderly.<sup>28</sup> Yokoya et al recently concluded that higher frequency of leaving  
56  
57 330 home, higher exercise levels and presence of interest in activities (e.g., meeting friends,  
58  
59 331 shopping, working in the garden) were associated with a reduced risk for fall in community  
60

1  
2  
3 332 dwelling elders.<sup>28</sup> Maintaining and enhancing physical functions, principally walking ability  
4  
5 333 and walking speed are critical for fall prevention among elderly.<sup>29,30</sup> Age appropriate  
6  
7 334 exercises including those enhancing muscle strength and improving balance can probably  
8  
9 335 reduce the incidence of falls among elderly.<sup>30</sup>

10  
11 336 A history of falls in the previous year appears to be the most consistent risk factor across  
12  
13 337 several studies.<sup>19,30,31</sup> Pooled data from several studies in the recent meta-analysis puts the  
14  
15 338 risk at an OR of 2.77 (95% CI, 2.37, 3.25) for falls and an OR of 3.46 (95%CI, 2.85, 4.22) for  
16  
17 339 recurrent falls, in agreement with the current study (2.59 & 3.39 respectively).<sup>19</sup> Suzuki et al  
18  
19 340 reported that five out of six elderly with a history of falls were anxious about another fall and  
20  
21 341 one in three said that they did not venture out again due to fear of another fall.<sup>30</sup>

22  
23 342 One notable finding in our study was the lack of association for falls with medication use for  
24  
25 343 most groups of medications except for antihypertensive medications. This is in contrast to a  
26  
27 344 meta-analysis of the impact of medication classes on falls in elderly.<sup>32</sup> Woolcott et al reported  
28  
29 345 an OR of 1.41 (95% CI, 1.20-1.71) for falls among elderly with benzodiazepine use.<sup>32</sup> The  
30  
31 346 lack of association between sedatives use and falls in our study is probably due to the limited  
32  
33 347 number of subjects reporting the use of the same (6.9%). We saw an inverse association  
34  
35 348 between falls and the use of antihypertensive drug use in the current study. One probable  
36  
37 349 reason could be the high proportion of uncontrolled hypertensives in the study population.  
38  
39 350 This finding needs to be explored further in future studies.

40  
41 351 Several studies have earlier suggested that the prevalence of falls in low and middle income  
42  
43 352 countries are higher than that reported from high income countries.<sup>4-6</sup> The morbidity from  
44  
45 353 falls and related events too appear to be higher in low and middle income countries compared  
46  
47 354 to high income countries like US.<sup>4-6</sup> There appears to be low awareness about the  
48  
49 355 consequences of falls in low and middle income countries. This could probably be due to the  
50  
51 356 lack of data regarding falls reported from these regions. It is expected that the awareness  
52  
53 357 related to falls will improve with dissemination of data from the current study as well as  
54  
55 358 similar studies from this region. The same may also stimulate research into the interventional  
56  
57 359 options to reduce fall related mortality and morbidity.

58  
59 360 The strengths of the current study include; prospective cohort study design, large sample size  
60  
361 (n=1000), representative urban and rural population components, inclusion of participants  
362 from different Socioeconomic levels, no participants lost to follow up and use of a fall diary

363 to avoid recall bias. However, the study included participants from a limited geographical  
364 setting and was able to follow up only for a shorter period (one year) and hence the  
365 generalisation of the study findings is limited.

366

### 367 **Conclusion**

368

369 One in five community dwelling elderly citizens fall on an annual basis and one in four of  
370 those who fall are prone to fall again in the same calendar year. Female sex, movement  
371 disorders including parkinsonism, arthritis, dependence in basic activities of daily living,  
372 living alone during daytime and a history of falls in the previous year appear to predict a fall  
373 in the following year. Any intervention targeting a reduction in falls among the elderly need  
374 to focus on the modifiable risk factors like living alone at home during daytime, movement  
375 disorders and arthritis. We need to encourage mechanisms that may reduce dependence of  
376 elderly on basic activities of daily living. Attention should also be given to encourage both  
377 physical activity and interests in social activities among elderly subjects.

378

379 **Competing Interests:** Authors have no competing interests.

380

### 381 **Funding:**

382 This research received no specific grant from any funding agency in the public, commercial  
383 or not-for-profit sectors.

384

### 385 **References:**

386

387 1. United Nations, Department of Economic and Social Affairs, Population Division (2017). World Population  
388 Prospects: The 2017 Revision, Key Findings and Advance Tables. Working Paper No. ESA/P/WP/248., n.d.

389 2. Rubenstein LZ. Falls in older people: epidemiology, risk factors and strategies for prevention. Age Ageing.  
390 2006 Sep;35 Suppl 2:ii37-ii41.

391 3. Gibson MJ, Andres RO, Isaacs B, Radebaugh T, Worm-Petersen J. The prevention of falls in later life. A  
392 report of the Kellogg International Work Group on the prevention of falls by the elderly. Danish Medical  
393 Bulletin 1987;34(Suppl 4):1-24.

394 4. Beard JR, Biggs S, Bloom DE, Fried LP, Hogan P, Kalache A, et al. Global population ageing: peril or  
395 promise? Geneva: World Economic Forum; 2012. p. 148.

396

397 5. WHO fact sheet <https://www.who.int/news-room/fact-sheets/detail/falls>

398 6. Institute for Health Metrics and Evaluation: GBD Compare. [http:// www.healthmetricsandevaluation.org/gbd](http://www.healthmetricsandevaluation.org/gbd).  
399 Accessed 25 May 2015.

400

401 7. Murray CJL, Vos T, Lozano R, Naghavi M, Flaxman AD, Michaud C, et al. Disability-adjusted life years  
402 (DALYs) for 291 diseases and injuries in 21 regions, 1990–2010: a systematic analysis for the Global Burden of  
403 Disease Study 2010. Lancet. 2012;380:2198–227.



- 1  
2  
3 404  
4  
5 405 8. Heather Hestekin et al., "Measuring Prevalence and Risk Factors for Fall Related Injury in Older Adult in  
6 406 Low Middle Income Countries, Results from the WHO Study on Global AGEing and Adult Health," July 2013,  
7 407 06.
- 8 408 9. Lord SR, Sherrington C, Menz HB. Falls in Older People: Risk Factors and Strategies for Prevention. 2nd ed.  
9 409 Cambridge, MA: Cambridge University Press; 2007.
- 10 410 10. Tinetti ME, Speechley M, Ginter SF. Risk factors for falls among elderly persons living in the community.  
11 411 N Engl J Med. 1988 Dec 29;319(26):1701-7.
- 12  
13 412 11. O'Loughlin JL, Robitaille Y, Boivin JF, Suissa S. Incidence of and risk factors for falls and injurious falls  
14 413 among the community-dwelling elderly. Am J Epidemiol. 1993 Feb 1;137(3):342-54.
- 15 414 12. Lord SR, Ward JA, Williams P, Anstey KJ. An epidemiological study of falls in older community-dwelling  
16 415 women: the Randwick falls and fractures study. Aust J Public Health. 1993 Sep;17(3):240-5.
- 17 416 13. Campbell AJ, Borrie MJ, Spears GF. Risk factors for falls in a community-based prospective study of  
18 417 people 70 years and older. J Gerontol. 1989 Jul;44(4):M112-7.
- 19  
20 418 14. Luukinen H, Koski K, Laippala P, Kivelä SL. Predictors for recurrent falls among the home-dwelling  
21 419 elderly. Scand J Prim Health Care. 1995 Dec;13(4):294-9.
- 22 420 15. Aniket Sirohi1, Ravneet Kaur, Anil Kumar Goswami, Kalaivani Mani, Baridalyne Nongkynrih, Sanjeev  
23 421 Kumar Gupta, "A Study of Falls among Elderly Persons in a Rural Area of Haryana," Indian Journal of Public  
24 422 Health 61, no. 2 (2017): 99–104, [https://doi.org/10.4103/ijph.IJPH\\_102\\_16](https://doi.org/10.4103/ijph.IJPH_102_16).
- 25 423 16. Dr. B. Krishnaswamy, Dr. Gnanasambandam Usha, "FALLS IN OLDER PEOPLE NATIONAL /  
26 424 REGIONAL REVIEW INDIA," n.d., <http://www.who.int/ageing/projects/SEARO.pdf>.
- 27  
28 425 17. Dr Anku Moni Saikia , Dr Ashok Kumar Das, Ms Anjana Moyee Saikia, "Prevalence and Correlates of Falls  
29 426 among Community-Dwelling Elderly of Guwahati City, Assam," Indian Journal of Basic and Applied Medical  
30 427 Research; 5, no. 2 (March 2016): 185–90.
- 31 428 18. Pawan Kumar Sharma, Clare Bunker, Tushar Singh, Enakshi Ganguly, P sudhakar Reddy, Anne B Newman  
32 429 et al., "Burden and Correlates of Falls among Rural Elders of South India: Mobility and Independent Living in  
33 430 Elders Study," Current Gerontology and Geriatrics Research 2017 (2017): 1–8,  
34 431 <https://doi.org/10.1155/2017/1290936>.
- 35  
36 432 19. Deandrea S, Lucenteforte E, Bravi F, Foschi R, La Vecchia C, Negri E. Risk factors for falls in community-  
37 433 dwelling older people: a systematic review and meta-analysis. Epidemiology. 2010 Sep;21(5):658-68.
- 38 434 20. Kathryn Mitchell-Fearon et al., "Falls Among Community-Dwelling Older Adults in Jamaica," SAGE Open  
39 435 4, no. 4 (December 18, 2014): 215824401456435, <https://doi.org/10.1177/2158244014564351>.
- 40 436 21. "Appropriate Body-Mass Index for Asian Populations and Its Implications for Policy and Intervention  
41 437 Strategies," The Lancet 363, no. 9403 (January 2004): 157–63, [https://doi.org/10.1016/S0140-6736\(03\)15268-3](https://doi.org/10.1016/S0140-6736(03)15268-3).  
42 438
- 43 439 22. Divyamol K Sasidharan, Lalu J S, Vijayakumar P et al. "Morbidity Pattern Among The Geriatric Population  
44 440 In South India: An Observational Study," Epidemiology International 03, no. 01 (April 2, 2018): 11–17,  
45 441 <https://doi.org/10.24321/2455.7048.201803>  
46 442
- 47 443 23. Chu LW, Chi I, Chiu AY. Incidence and predictors of falls in the Chinese elderly. Ann Acad Med  
48 444 Singapore. 2005 Jan;34(1):60-72.
- 49 445 24. Suzanne G. Leveille, "Chronic Musculoskeletal Pain and the Occurrence of Falls in an Older Population,"  
50 446 JAMA 302, no. 20 (November 25, 2009): 2214, <https://doi.org/10.1001/jama.2009.1738>.
- 51  
52 447 25. Adam L. Doré et al., "Lower-Extremity Osteoarthritis and the Risk of Falls in a Community-Based  
53 448 Longitudinal Study of Adults with and without Osteoarthritis," Arthritis Care & Research 67, no. 5 (May 2015):  
54 449 633–39, <https://doi.org/10.1002/acr.22499>.
- 55 450 26. Keith D. Hill et al., "Balance and Falls Risk in Women with Lower Limb Osteoarthritis or Rheumatoid  
56 451 Arthritis," Journal of Clinical Gerontology and Geriatrics 4, no. 1 (March 2013): 22–28,  
57 452 <https://doi.org/10.1016/j.jcgg.2012.10.003>.
- 58  
59  
60

- 1  
2  
3 453 27. Daniel Prieto-Alhambra et al., “An Increased Rate of Falling Leads to a Rise in Fracture Risk in  
4 454 Postmenopausal Women with Self-Reported Osteoarthritis: A Prospective Multinational Cohort Study  
5 455 (GLOW),” *Annals of the Rheumatic Diseases* 72, no. 6 (June 2013): 911–17, [https://doi.org/10.1136/](https://doi.org/10.1136/annrheumdis-2012-201451)  
6 456 [annrheumdis-2012-201451](https://doi.org/10.1136/annrheumdis-2012-201451).
- 7 457 28. Yokoya T, Demura S, Sato S. Relationships between physical activity, ADL capability and fall risk in  
8 458 community-dwelling Japanese elderly population. *Environ Health Prev Med.* 2007 Jan;12(1):25-32.
- 9 459 29. Maki BE. Selection of perturbation parameters for identification of the posture-control system. *Med Biol*  
10 460 *Eng Comput.* 1986 Nov;24(6):561-8.
- 11 461 30. Suzuki T. [Epidemiology and implications of falling among the elderly]. *Nihon Ronen Igakkai Zasshi.* 2003  
12 462 Mar;40(2):85-94. Review. Article in Japanese.
- 13 463 31. Nevitt MC, Cummings SR, Kidd S, Black D. Risk factors for recurrent nonsyncopal falls. A prospective  
14 464 study. *JAMA.* 1989 May 12;261(18):2663-8.
- 15 465 32. Woolcott JC, Richardson KJ, Wiens MO, Patel B, Marin J, Khan KM, Marra CA. Meta-analysis of the  
16 466 impact of 9 medication classes on falls in elderly persons. *Arch Intern Med.* 2009 Nov 23;169(21):1952-60.
- 17 467  
18 468  
19 469  
20 470  
21 471  
22 472  
23 473  
24 474  
25 475

## Tables

26 476 **Table 1. Baseline Details of the study population.**

| Demographic factors            | n (%)      |
|--------------------------------|------------|
| <b>Gender</b>                  |            |
| Male                           | 432(43.2)  |
| Female                         | 568(56.8)  |
| <b>Age group</b>               |            |
| 65-75                          | 648(64.8)  |
| 75-85                          | 262(26.2)  |
| >85                            | 90(9.0)    |
| <b>Weight Status(BMI)</b>      |            |
| Underweight(<18.5)             | 124(12.4)  |
| Normal(18.5-22.9)              | 340(34.0)  |
| Overweight(23-24.9)            | 188(18.8)  |
| Pre Obese(25-29.9)             | 264(26.4)  |
| Obese(>30)                     | 84(8.4)    |
| <b>Education</b>               |            |
| Graduate and above             | 132(13.2)  |
| Diploma / Pre-degree           | 85(8.5)    |
| Middle class / Primary         | 657(65.7)  |
| Illiterate                     | 126(12.6)  |
| <b>House Hold</b>              |            |
| Living with family / caretaker | 820 (82.0) |
| Living alone during daytime    | 145 (14.5) |

|                 |              |           |
|-----------------|--------------|-----------|
|                 | Living alone | 35 (3.5)  |
| <b>Domicile</b> | Urban        | 700(70.0) |
|                 | Rural        | 300(30.0) |

477

478

479

480

481

482

483

484

485

486

487

488

**Table.2. Association of falls with baseline variables – bivariate comparisons**

| Risk factors<br>n(%)                       | Prospective falls |               | OR (95% CI)      | P value |
|--------------------------------------------|-------------------|---------------|------------------|---------|
|                                            | No Fall<br>n (%)  | Fall<br>n (%) |                  |         |
| <b>Gender</b>                              |                   |               |                  |         |
| Men <b>[432(43.2)]</b>                     | 365(84.5)         | 67(15.5)      | 1.68(1.21-2.33)  | 0.002   |
| Women <b>[568(56.8)]</b>                   | 434(76.4)         | 134(23.6)     |                  |         |
| <b>Age Group in years</b>                  |                   |               |                  |         |
| 65-75 <b>[648(64.8)]</b>                   | 528(81.5)         | 120(18.5)     | 1.14 (0.80-1.64) | 0.468   |
| 75-85 <b>[262(26.2)]</b>                   | 208(79.4)         | 54(20.6)      |                  |         |
| >85 <b>[90(9.0)]</b>                       | 63(70.0)          | 27(30.0)      |                  |         |
| <b>Diabetes [342(34.2)]</b>                |                   |               |                  |         |
| No                                         | 532(80.9)         | 126(19.1)     | 1.19(0.86-1.63)  | 0.298   |
| Yes                                        | 267(78.1)         | 75(21.9)      |                  |         |
| <b>Hypertension (768(76.8))</b>            |                   |               |                  |         |
| No                                         | 181(78.0)         | 51(22.0)      | 0.86(0.60-1.23)  | 0.414   |
| Yes                                        | 618(80.5)         | 150(19.5)     |                  |         |
| <b>Asthma or COPD (225(22.5))</b>          |                   |               |                  |         |
| No                                         | 622(80.3)         | 153(19.7)     | 1.10(0.77-1.59)  | 0.600   |
| Yes                                        | 177(78.7)         | 48(21.3)      |                  |         |
| <b>Coronary Artery Disease (201(20.1))</b> |                   |               |                  |         |
| No                                         | 639(80.0)         | 160(20.0)     | 1.02(0.69-1.50)  | 0.906   |
| Yes                                        | 160(79.6)         | 41(20.4)      |                  |         |
| <b>Cerebrovascular Disease</b>             |                   |               |                  |         |

|                                                   |     |           |           |                 |       |
|---------------------------------------------------|-----|-----------|-----------|-----------------|-------|
| <b>(53(5.3))</b>                                  | No  | 762(80.5) | 185(19.5) | 1.78(0.97-3.27) | 0.060 |
|                                                   | Yes | 37(69.8)  | 16(30.2)  |                 |       |
| <b>Alcohol (177(17.7))</b>                        | No  | 654(79.5) | 169(20.5) | 0.85(0.56-1.30) | 0.460 |
|                                                   | Yes | 145(81.9) | 32(18.1)  |                 |       |
| <b>Smoking (178(17.8))</b>                        | No  | 652(79.3) | 170(20.7) | 0.81(0.53-1.23) | 0.324 |
|                                                   | Yes | 147(82.6) | 31(17.4)  |                 |       |
| <b>Living Arrangement</b>                         |     |           |           |                 |       |
| Living with family/caretaker<br><b>(820(82))</b>  |     | 669(81.6) | 151(18.4) |                 |       |
| Living alone during daytime<br><b>(145(14.5))</b> |     | 109(75.2) | 36(24.8)  | 2.95(1.47-5.94) | 0.002 |
| Living alone <b>(35(3.5))</b>                     |     | 21(60.0)  | 14(40.0)  | 1.46(0.97-2.22) | 0.073 |

489

490

491

492

493

494

**Table 3. Association of falls with factors affecting locomotion – Bivariate comparisons**

| Risk factors                                            | Prospective falls   |                  | OR (95% CI) | P value          |       |
|---------------------------------------------------------|---------------------|------------------|-------------|------------------|-------|
|                                                         | No Fallers<br>n (%) | Fallers<br>n (%) |             |                  |       |
| <b>Parkinsonism(28(2.8))</b>                            | No                  | 782(80.5)        | 190(19.5)   | 2.663(1.23-5.78) | 0.010 |
|                                                         | Yes                 | 17(60.7)         | 11(39.3)    |                  |       |
| <b>Vertigo(388(38.8))</b>                               | No                  | 505(82.5)        | 107(17.5)   | 1.51(1.10-2.06)  | 0.010 |
|                                                         | Yes                 | 294(75.8)        | 94(24.2)    |                  |       |
| <b>Arthritis(281(28.1))</b>                             | No                  | 591(82.2)        | 128(17.8)   | 1.62(1.17-2.25)  | 0.004 |
|                                                         | Yes                 | 208(74.0)        | 73(26.0)    |                  |       |
| <b>Knee pain (565(56.5))</b>                            | No                  | 356(81.8)        | 79(18.2)    | 1.24(0.91-1.70)  | 0.179 |
|                                                         | Yes                 | 443(78.4)        | 122(21.6)   |                  |       |
| <b>Numbness and paraesthesia<br/>of feet(475(47.5))</b> | No                  | 432(82.3)        | 93(17.7)    | 1.37(1.00-1.86)  | 0.048 |
|                                                         | Yes                 | 367(77.3)        | 108(22.7)   |                  |       |
| <b>Urinary symptoms<br/>(316(31.6))</b>                 | No                  | 558(81.6)        | 126(18.4)   | 1.38(0.99-1.90)  | 0.051 |
|                                                         | Yes                 | 241(76.3)        | 75(23.7)    |                  |       |

|                                                                               |     |           |           |                    |        |
|-------------------------------------------------------------------------------|-----|-----------|-----------|--------------------|--------|
| <b>Visual impairment (594(59.4))</b>                                          | No  | 326(80.3) | 80(19.7)  | 1.04(0.76-1.43)    | 0.796  |
|                                                                               | Yes | 473(79.6) | 121(20.4) |                    |        |
| <b>Not independent in Basic Activities of daily living (59(5.9))</b>          | Yes | 766(81.4) | 175(18.6) | 3.45(2.01-5.92)    | <0.001 |
|                                                                               | No  | 33(55.9)  | 26(44.1)  |                    |        |
| <b>Not independent in Instrumental activities of daily living (306(30.6))</b> | Yes | 572(82.4) | 122(17.6) | 1.63(1.18-2.25)    | 0.003  |
|                                                                               | No  | 227(74.2) | 79(25.8)  |                    |        |
| <b>Regular exercise or Yoga (342(34.2))</b>                                   | Yes | 281(82.2) | 61(17.8)  | 1.25(0.89-1.74)    | 0.198  |
|                                                                               | No  | 518(78.7) | 140(21.3) |                    |        |
| <b>History of falls in the previous 1 year (269(26.9))</b>                    | Yes | 182(67.7) | 87(32.3)  | 2.59 (1.87 – 3.58) | <0.001 |
|                                                                               | No  | 617(84.4) | 114(15.6) |                    |        |

495

496

497

498 **Table 4 Risk factors of falls in community dwelling elderly subjects**

| <b>Risk Factors</b>                            | <b>Odds Ratio (95% CI)</b> | <b>P value</b> |
|------------------------------------------------|----------------------------|----------------|
| <b>All Falls</b>                               |                            |                |
| Females                                        | 1.48 (1.05, 2.10)          | 0.027          |
| Movement disorders / Parkinson's Disease       | 2.26 (1.00, 5.05)          | 0.048          |
| Arthritis                                      | 1.48 (1.05, 2.09)          | 0.026          |
| Dependence in basic activities of daily living | 3.49 (2.00, 6.09)          | <0.001         |
| Not using antihypertensive medications         | 1.53 (1.10, 2.13)          | 0.012          |
| Living alone during daytime                    | 3.27 (1.59, 6.71)          | 0.001          |
| History of falls in previous year              | 2.25 (1.60, 3.15)          | <0.001         |
| <b>Recurrent Falls</b>                         |                            |                |
| Females                                        | 2.05 (1.07, 3.95)          | 0.031          |
| Dependence in basic activities of daily living | 3.63 (1.71, 7.70)          | 0.001          |
| History of falls in previous year              | 3.39 (1.89, 6.05)          | <0.001         |

499

500

501

1  
2  
3 502  
4  
5 503  
6 504  
7 505  
8  
9 506  
10 507  
11 508  
12  
13 509  
14 510  
15

## Figure legends

Fig.1 Flowchart of the study design

### **Contributorship statement** :-

512 Divyamol K S and Priya Vijayakumar conceptualised the original idea. Divyamol K S and  
513 Manu Raj did review of literature and planned, conducted analysed and prepared manuscript  
514 of the research work. Priya Vijayakumar supervised the experiment and in final editing of the  
515 article. Sumi Soman and Libin Antony was involved in data acquisition and analysis. Abish  
516 Sudhakar and Conrad Kabali derived the models and analysed the data.

### **Data availability statement** :-

518 All data relevant to the study are included in the article or uploaded as supplementary information.  
519  
520  
521  
522  
523  
524

**Figure**

**Fig.1 Flowchart of the Study Design**

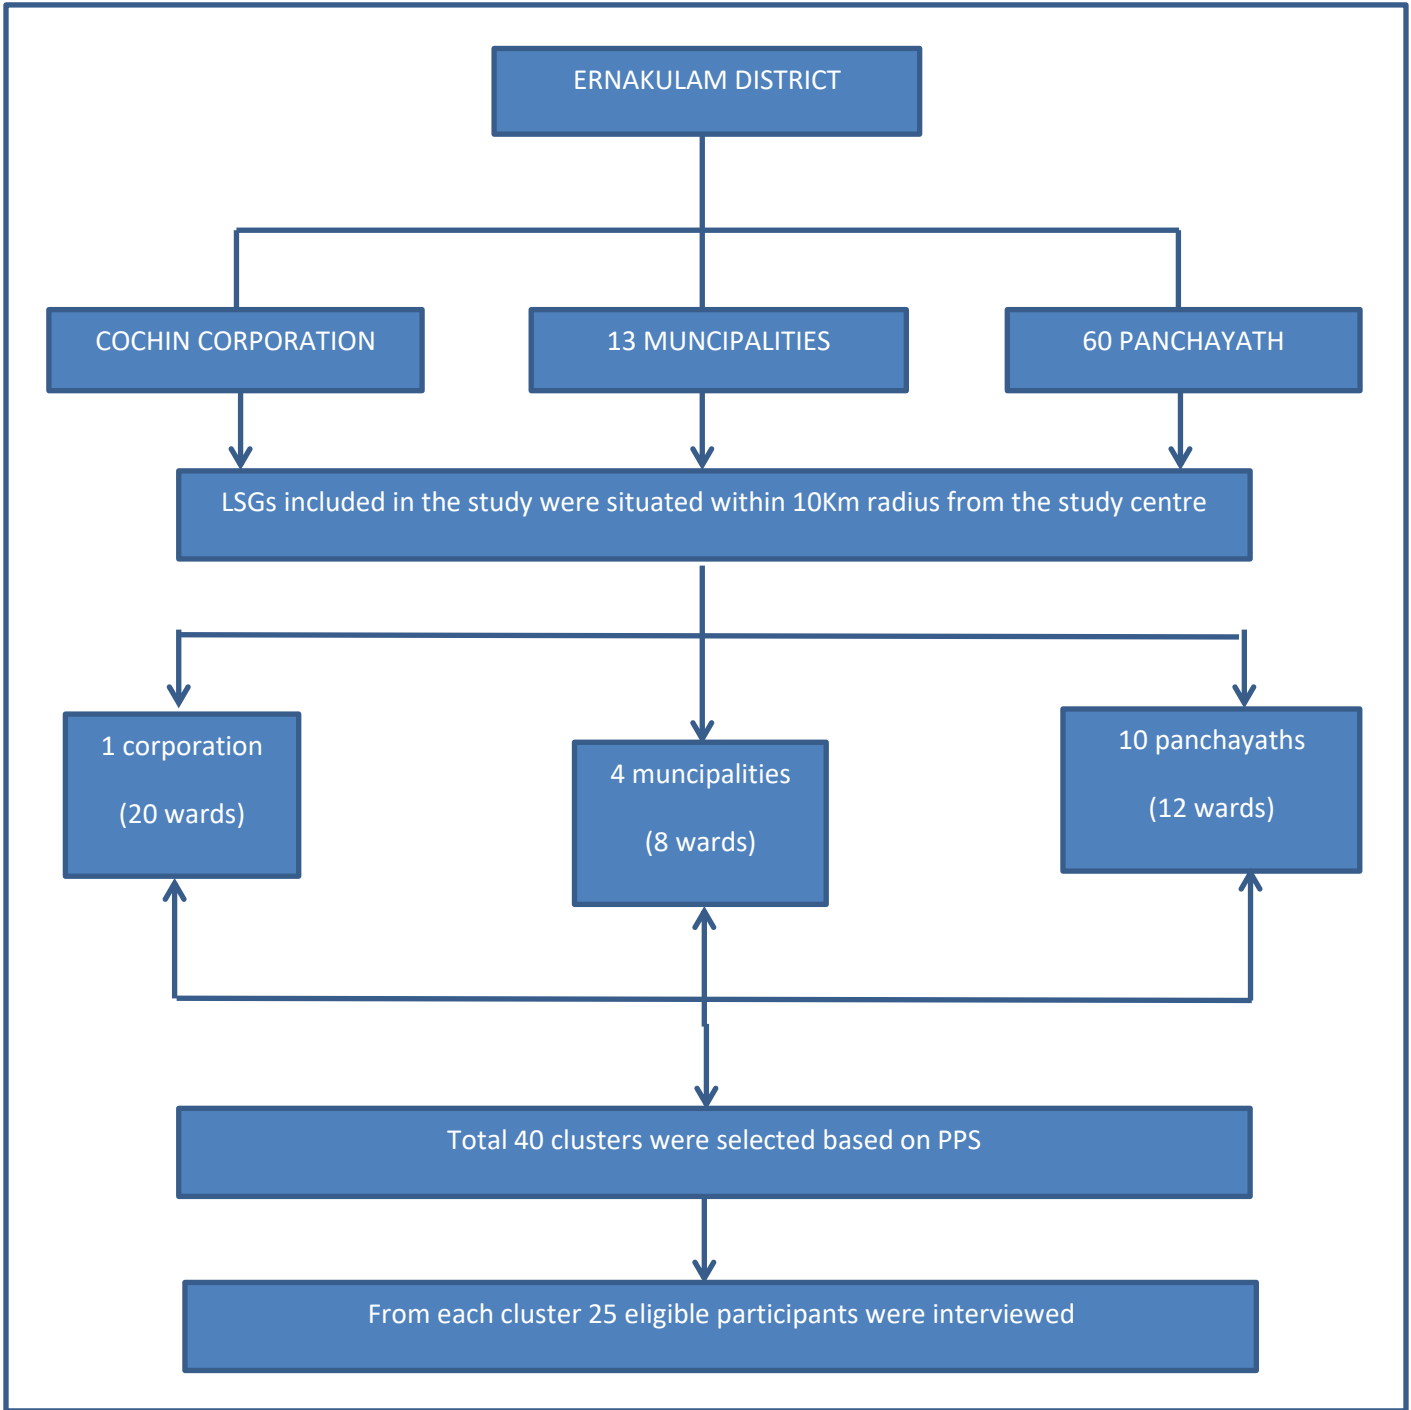

STROBE Statement—Checklist of items that should be included in reports of *cohort studies*

|                           |    | <b>Recommendation</b>                                                                                                                                                                             | <b>Action taken</b>                 |
|---------------------------|----|---------------------------------------------------------------------------------------------------------------------------------------------------------------------------------------------------|-------------------------------------|
| <b>Title and abstract</b> | 1  | (a) Indicate the study's design with a commonly used term in the title or the abstract                                                                                                            | Page 2, Line 50 & 51                |
|                           |    | (b) Provide in the abstract an informative and balanced summary of what was done and what was found                                                                                               | Page 2-3, Line 53-73                |
| <b>Introduction</b>       |    |                                                                                                                                                                                                   |                                     |
| Background/rationale      | 2  | Explain the scientific background and rationale for the investigation being reported                                                                                                              | Page 4, Line 86-103                 |
| Objectives                | 3  | State specific objectives, including any prespecified hypotheses                                                                                                                                  | Page 5, Line 120-123                |
| <b>Methods</b>            |    |                                                                                                                                                                                                   |                                     |
| Study design              | 4  | Present key elements of study design early in the paper                                                                                                                                           | Page 5, Line 127                    |
| Setting                   | 5  | Describe the setting, locations, and relevant dates, including periods of recruitment, exposure, follow-up, and data collection                                                                   | Page 5, Line 128-132                |
| Participants              | 6  | (a) Give the eligibility criteria, and the sources and methods of selection of participants. Describe methods of follow-up                                                                        | Page 5-6, Line 141-153              |
|                           |    | (b) For matched studies, give matching criteria and number of exposed and unexposed                                                                                                               | Not Applicable                      |
| Variables                 | 7  | Clearly define all outcomes, exposures, predictors, potential confounders, and effect modifiers. Give diagnostic criteria, if applicable                                                          | Page 6, Line 154-158                |
| Data sources/measurement  | 8* | For each variable of interest, give sources of data and details of methods of assessment (measurement). Describe comparability of assessment methods if there is more than one group              | Page 6-7, Line 163-181              |
| Bias                      | 9  | Describe any efforts to address potential sources of bias                                                                                                                                         | Page 6-7, Line 173-176, 177-179     |
| Study size                | 10 | Explain how the study size was arrived at                                                                                                                                                         | Page 5, Line 133- 140               |
| Quantitative variables    | 11 | Explain how quantitative variables were handled in the analyses. If applicable, describe which groupings were chosen and why                                                                      | Page 7, Line 183-194                |
| Statistical methods       | 12 | (a) Describe all statistical methods, including those used to control for confounding                                                                                                             | Page 7, Line 183-194                |
|                           |    | (b) Describe any methods used to examine subgroups and interactions                                                                                                                               | Not done                            |
|                           |    | (c) Explain how missing data were addressed                                                                                                                                                       | No missing data was encountered     |
|                           |    | (d) If applicable, explain how loss to follow-up was addressed                                                                                                                                    | No Loss to follow up was reported   |
|                           |    | (e) Describe any sensitivity analyses                                                                                                                                                             | Not Applicable                      |
| <b>Results</b>            |    |                                                                                                                                                                                                   |                                     |
| Participants              | 13 | (a) Report numbers of individuals at each stage of study—eg numbers potentially eligible, examined for eligibility, confirmed eligible, included in the study, completing follow-up, and analysed | Page 8, Line 206-208<br>Refer Fig 1 |
|                           |    | (b) Give reasons for non-participation at each stage                                                                                                                                              | Not Applicable                      |



|                          |    |                                                                                                                                                                                                              |                          |
|--------------------------|----|--------------------------------------------------------------------------------------------------------------------------------------------------------------------------------------------------------------|--------------------------|
|                          |    | (c) Consider use of a flow diagram                                                                                                                                                                           | Figure 1                 |
| Descriptive data         | 14 | (a) Give characteristics of study participants (eg demographic, clinical, social) and information on exposures and potential confounders                                                                     | Page 8, Line 207-219     |
|                          | *  | (b) Indicate number of participants with missing data for each variable of interest                                                                                                                          | No missing data          |
|                          |    | (c) Summarise follow-up time (eg, average and total amount)                                                                                                                                                  | Page 6-7, Line 176-177   |
| Outcome data             | 15 | Report numbers of outcome events or summary measures over time                                                                                                                                               | Page 8, Line 221-231     |
| Main results             | 16 | (a) Give unadjusted estimates and, if applicable, confounder-adjusted estimates and their precision (eg, 95% confidence interval). Make clear which confounders were adjusted for and why they were included | Page 8-9, Line 232-262   |
|                          |    | (b) Report category boundaries when continuous variables were categorized                                                                                                                                    | Not applicable           |
|                          |    | (c) If relevant, consider translating estimates of relative risk into absolute risk for a meaningful time period                                                                                             | Not applicable           |
| Other analyses           | 17 | Report other analyses done—eg analyses of subgroups and interactions, and sensitivity analyses                                                                                                               | Page 09, Line 263-283    |
| <b>Discussion</b>        |    |                                                                                                                                                                                                              |                          |
| Key results              | 18 | Summarise key results with reference to study objectives                                                                                                                                                     | Page 10, Line 286-292    |
| Limitations              | 19 | Discuss limitations of the study, taking into account sources of potential bias or imprecision. Discuss both direction and magnitude of any potential bias                                                   | Page 13, Line 363-365    |
| Interpretation           | 20 | Give a cautious overall interpretation of results considering objectives, limitations, multiplicity of analyses, results from similar studies, and other relevant evidence                                   | Page 11-12, Line 300-359 |
| Generalisability         | 21 | Discuss the generalisability (external validity) of the study results                                                                                                                                        | Page 13, Line 363-365    |
| <b>Other information</b> |    |                                                                                                                                                                                                              |                          |
| Funding                  | 22 | Give the source of funding and the role of the funders for the present study and, if applicable, for the original study on which the present article is based                                                | Page 13, Line 369-370    |

# BMJ Open

## Incidence and risk factors for falls among community dwelling elderly subjects on a one year follow up - A prospective cohort study from Ernakulam, Kerala, India

|                                 |                                                                                                                                                                                                                                                                                                                                                                                                                                                                                                                                                                                                                                                 |
|---------------------------------|-------------------------------------------------------------------------------------------------------------------------------------------------------------------------------------------------------------------------------------------------------------------------------------------------------------------------------------------------------------------------------------------------------------------------------------------------------------------------------------------------------------------------------------------------------------------------------------------------------------------------------------------------|
| Journal:                        | <i>BMJ Open</i>                                                                                                                                                                                                                                                                                                                                                                                                                                                                                                                                                                                                                                 |
| Manuscript ID                   | bmjopen-2019-033691.R3                                                                                                                                                                                                                                                                                                                                                                                                                                                                                                                                                                                                                          |
| Article Type:                   | Original research                                                                                                                                                                                                                                                                                                                                                                                                                                                                                                                                                                                                                               |
| Date Submitted by the Author:   | 13-May-2020                                                                                                                                                                                                                                                                                                                                                                                                                                                                                                                                                                                                                                     |
| Complete List of Authors:       | Sasidharan, Divyamol; Amrita Institute of Medical Sciences and Research Centre, Geriatric Medicine; Government of Goa Directorate of Health Services, Geriatric Medicine<br>Vijayakumar, Priya; Amrita Vishwa Vidyapeetham, Geriatric Medicine<br>Raj, Manu; Amrita Institute of Medical Sciences and Research Centre, pediatrics & pediatric cardiology<br>Soman, Sumi ; Amrita Vishwa Vidyapeetham, Public Health Research<br>Antony, Libin; Amrita Vishwa Vidyapeetham, Public Health Research<br>Sudhakar, Abish; Amrita Institute of Medical Sciences and Research Centre, Pediatric Cardiology<br>Kabali, Conrad; Health Quality Ontario, |
| <b>Primary Subject Heading</b>: | Geriatric medicine                                                                                                                                                                                                                                                                                                                                                                                                                                                                                                                                                                                                                              |
| Secondary Subject Heading:      | Epidemiology, Public health                                                                                                                                                                                                                                                                                                                                                                                                                                                                                                                                                                                                                     |
| Keywords:                       | Falls, Elderly, Community based study, Cohort Study, Kerala                                                                                                                                                                                                                                                                                                                                                                                                                                                                                                                                                                                     |
|                                 |                                                                                                                                                                                                                                                                                                                                                                                                                                                                                                                                                                                                                                                 |

SCHOLARONE™  
Manuscripts



I, the Submitting Author has the right to grant and does grant on behalf of all authors of the Work (as defined in the below author licence), an exclusive licence and/or a non-exclusive licence for contributions from authors who are: i) UK Crown employees; ii) where BMJ has agreed a CC-BY licence shall apply, and/or iii) in accordance with the terms applicable for US Federal Government officers or employees acting as part of their official duties; on a worldwide, perpetual, irrevocable, royalty-free basis to BMJ Publishing Group Ltd ("BMJ") its licensees and where the relevant Journal is co-owned by BMJ to the co-owners of the Journal, to publish the Work in this journal and any other BMJ products and to exploit all rights, as set out in our [licence](#).

The Submitting Author accepts and understands that any supply made under these terms is made by BMJ to the Submitting Author unless you are acting as an employee on behalf of your employer or a postgraduate student of an affiliated institution which is paying any applicable article publishing charge ("APC") for Open Access articles. Where the Submitting Author wishes to make the Work available on an Open Access basis (and intends to pay the relevant APC), the terms of reuse of such Open Access shall be governed by a Creative Commons licence – details of these licences and which [Creative Commons](#) licence will apply to this Work are set out in our licence referred to above.

Other than as permitted in any relevant BMJ Author's Self Archiving Policies, I confirm this Work has not been accepted for publication elsewhere, is not being considered for publication elsewhere and does not duplicate material already published. I confirm all authors consent to publication of this Work and authorise the granting of this licence.

1 **Type of article:** Original

2 **Title of the article:** Incidence and risk factors for falls among community dwelling elderly  
3 **subjects on a one year follow up - A prospective cohort study from Ernakulam, Kerala,**  
4 **India**

5 **Running title :** Risk factors for falls among community dwelling elderly subjects in Kerala

6 **Contributors**

- 7 1. Divyamol K Sasidharan, MD (Geriatric Medicine), [jisbbb87@gmail.com](mailto:jisbbb87@gmail.com), Geriatric  
8 Medicine Department, Amrita Institute of Medical Science, Kochi, Kerala, India
- 9 2. Priya Vijayakumar, MD (General Medicine), [divz64@gmail.com](mailto:divz64@gmail.com), Geriatric Medicine  
10 Department, Amrita Institute of Medical Science, Kochi, Kerala, India
- 11 3. Manu Raj, DNB (Pediatric Cardiology), [drmanuraj@gmail.com](mailto:drmanuraj@gmail.com), Public Health Research  
12 Department, Amrita Institute of Medical Science, Kochi, Kerala, India
- 13 4. Sumi Soman, MSc Nursing, [sumisoman90@gmail.com](mailto:sumisoman90@gmail.com), Public Health Research  
14 Department, Amrita Institute of Medical Science, Kochi, Kerala, India
- 15 5. Libin Antony P F, Msc Nursing, [libinantony.antony@gmail.com](mailto:libinantony.antony@gmail.com), Public Health Research  
16 Department, Amrita Institute of Medical Science, Kochi, Kerala, India
- 17 6. Abish Sudhakar, MA Sociology, [abishsudhakar@aims.amrita.edu](mailto:abishsudhakar@aims.amrita.edu), Paediatric  
18 Cardiology, Amrita Institute of Medical Science, Kochi, Kerala, India
- 19 7. Conrad Kabali, PhD Biostatistics, [ckabali@gmail.com](mailto:ckabali@gmail.com), Division of  
20 Epidemiology, University of Toronto Dalla Lana School of Public Health, Toronto, Ontario,  
21 Canada

22  
23 **Department(s) and Institution(s):** Department of Geriatric Medicine, Public Health  
24 Research Department, Amrita Institute of Medical Science, Kochi, Kerala, India

25  
26 **Corresponding Author:**

27 Name : Priya Vijayakumar

28 Address : Clinical Professor

29 Department of Geriatric Medicine

30 Amrita Institute of Medical Sciences, Kochi

1  
2  
3  
4 31 Phone numbers : 9995653009  
5  
6 32 E-mail address : divz64@gmail.com

7  
8 33 Total number of pages: 18 Word counts  
9  
10 34 for abstract: 288  
11 35 for the text: 3789

12  
13 36 Source(s) of support: Nil

14  
15 37 Presentation at a meeting: Nil

16  
17 38 Total number of photographs: Nil

18  
19 39

20 40 **Competing Interests:** The authors have no competing interests.

21  
22 41

23 42 **Funding:**

24 43 This research received no specific grant from any funding agency in the public, commercial  
25  
26 44 or not-for-profit sectors.

27  
28  
29 45 **Acknowledgement:** We are thankful to Dr.Sunil K S, Mrs.Ramya Raju, Mrs.Georgina P, and  
30 46 Dr.Jishnu S Lalu for the valuable inputs provided during planning, data collection and  
31  
32 47 analysis stage.

33  
34 48

35  
36 49 **Title:**

37  
38 50 **Incidence and risk factors for falls among community dwelling elderly subjects on a one**  
39  
40 51 **year follow up - A prospective cohort study from Ernakulam, Kerala, India**

41  
42 52 **Abstract**

43  
44  
45 53 **Objectives:** There is limited knowledge regarding epidemiology and risk of falls among the  
46 54 elderly living in low and middle income countries. In this situation, the current study aims to  
47 55 report the incidence of falls and associated risk factors among free living elderly population  
48  
49 56 from Kerala, India.

50  
51  
52 53 **Design:** Prospective cohort study with stratified random cluster sampling.

54  
55 54 **Setting:** The study location was Ernakulam, Kerala, India, and we collected information via  
56  
57 59 house visits using a questionnaire. During the research, the subjects were followed up

60 prospectively for one year by phone at intervals of three months and missing subjects were  
61 contacted by house visits.

62 **Participants:** Community dwelling elderly above 65years of age.

63 **Results:** We recruited a total of 1000 participants out of which a total of 201(20.1%) subjects  
64 reported a fall during follow-up. The incidence rate of falls was 31 (95% CI 27.7, 34.6) per  
65 100 person years. Female sex (OR 1.48, 95% CI 1.05, 2.10,  $p = 0.027$ ), movement disorders  
66 including parkinsonism (OR 2.26, 95% CI, 1.00, 5.05,  $p=0.048$ ), arthritis (OR 1.48, 95% CI  
67 1.05, 2.09,  $p=0.026$ ), dependence in basic activities of daily living (OR, 3.49, 95% CI 2.00,  
68 6.09,  $p<0.001$ ), not using antihypertensive medications (OR, 1.53, 95% CI 1.10, 2.13,  
69  $p=0.012$ ), living alone during daytime (OR 3.27, 95% CI 1.59, 6.71,  $p=0.001$ ) and a history  
70 of falls in the previous year (OR, 2.25, 95% CI 1.60, 3.15,  $p<0.001$ ) predicted a fall in the  
71 following year.

72 **Conclusions:** One in five community dwelling senior citizen fall annually and one in four  
73 who fall are prone to fall again in the following year. Interventions targeting falls among the  
74 elderly need to focus on modifiable risk factors such as living alone during daytime,  
75 movement disorders, arthritis and dependence on basic activities of daily living.

76 **Keywords:** Falls, Elderly, Community based study, Cohort Study, Kerala

#### 77 **Strengths and limitations of this study:**

- 79 • The study has a prospective cohort study design with a large sample size ( $n=1000$ ).
- 80 • The study population represented both urban and rural population from different  
81 Socio Economic Scale levels.
- 82 • None of the participants were lost to follow up and a fall diary was used to avoid  
83 recall bias.
- 84 • The data are from a single study setting.
- 85 • The study has a short period of follow up (one year).

#### 87 **Introduction**

88 Globally, there are an estimated 962 million people aged 60 or over, comprising 13 per cent  
89 of the total population.<sup>1</sup> In this segment of the population, unintentional injuries are reported

1  
2  
3 90 to be the fifth leading cause of death globally and falls constitute two out of every three  
4  
5 91 deaths in this category.<sup>2</sup> A fall is defined by The Kellogg International Working Group as  
6  
7 92 ‘unintentionally coming to the ground or some lower level and other than as a consequence of  
8  
9 93 sustaining a violent blow, loss of consciousness, sudden onset of paralysis as in stroke or an  
10  
11 94 epileptic seizure’.<sup>3</sup>

12  
13 95 The incidence of falls and the consequences of falls have been higher in lower and middle  
14  
15 96 income countries as compared to high income countries<sup>4-6</sup> mainly because fall preventing  
16  
17 97 interventions are not that freely available in many parts of these countries.<sup>7</sup> Each year an  
18  
19 98 estimated 646 000 individuals die from falls globally of which over 80% are in low- and  
20  
21 99 middle-income countries.<sup>4</sup> In 2010, for example, years lived with disability (YLDs) due to  
22  
23 100 reported falls were 631.2 per 100,000 (population) in India and 674.4 per 100,000 in China,  
24  
25 101 compared with 472.2 per 100,000 in the United States.<sup>5</sup> In that year, the global share of YLDs  
26  
27 102 due to falls in adults aged 50 to 59 years was 66 % in developing countries and 34 % in high  
28  
29 103 income developed countries.<sup>6</sup> Clearly, the situation needs to be addressed urgently as already  
30  
31 104 over 70 % of the world’s older population live in developing countries and the proportion is  
32  
33 105 likely to increase in the coming decades due to increasing longevity in all the regions of the  
34  
35 106 world.<sup>8</sup>

36  
37 107  
38 108 Many prospective population-based studies have examined the epidemiology of falls in the  
39  
40 109 community dwelling elderly across different settings. The reported incidence rates show wide  
41  
42 110 variability from as low as 29% to as high as 40% in this population.<sup>9-14</sup> Furthermore, various  
43  
44 111 studies done in India too have reported the prevalence of falls in community dwelling elderly  
45  
46 112 ranging from 13-53%.<sup>15-18</sup> The incidence of recurrent falls (more than two episodes per  
47  
48 113 calendar year was reported to be 11 to 21% by Lord et al.<sup>9</sup>

49  
50 114  
51 115 The risk factors for falls in the elderly as reported by Lord et al<sup>9</sup> can be grouped into seven  
52  
53 116 major categories: socio-demographic factors, balance and mobility factors, sensory and  
54  
55 117 neuromuscular factors, psychological factors, medical factors, medication use, and  
56  
57 118 environmental factors.<sup>9</sup> A recent meta-analysis by Deandrea et al<sup>19</sup> pooled data from 74  
58  
59 119 prospective cohort studies that reported risk factors for prospective falls among community  
60  
120 dwelling elders. A prior history of falls, gait problems, walking aid use, vertigo, parkinson

1  
2  
3 121 disease and anti-epileptic drug use were the dominant reasons for prospective falls in this age  
4  
5 122 group.<sup>19</sup>  
6  
7

8 123 The primary objective of our study was to report the incidence of falls in community  
9 124 dwelling elderly population from Ernakulam, Kerala, India through a year-long prospective  
10 125 follow up schedule, and the secondary objective was to identify factors that can predict a risk  
11 126 for future falls in community dwelling elderly.  
12  
13  
14

15 127

## 17 128 **Methods:**

### 19 129 *Selection and Description of participants:*

21  
22 130 **Design & Setting:** The current study is a community based prospective cohort study that was  
23 131 conducted in an area within a radius of ten kilometres from the study centre (Amrita Institute  
24 132 of Medical Sciences and Research Centre, Kochi, Kerala). The study was conducted over a  
25 133 period of three years (Nov 2014 to Nov 2017). This circular area included 12 panchayats,  
26 134 four municipalities and one corporation. The study area comes under  
27 135 Ernakulam district of Kerala, South India.  
28  
29  
30  
31  
32

33 136 We calculated the sample size using a previously published study by Mitchell-Fearson et al  
34 137 which reported 21.7% prevalence for falls in the elderly.<sup>20</sup> We selected an alpha of 0.05 and  
35 138 an allowable error of 20% giving us a minimum sample size of 347 subjects. The design  
36 139 effect for the sampling method (multistage stratified random cluster sampling) was calculated  
37 140 using a pilot of ten clusters (cluster size k=25) that provided an Intra Class Correlation (ICC)  
38 141 of 0.023. The sample size adjusted for design effect was 539 (inflation factor of 1.552). We  
39 142 enrolled a total of 1000 participants anticipating significant sub group differences within the  
40 143 study sample.  
41  
42  
43  
44  
45  
46  
47

48 144 **Participants:** We used stratified random cluster sampling method to select the participants.  
49 145 The sample was stratified at two levels, rural urban (level 1) and at the level of individual  
50 146 local self-governing units (LSGs, level 2). A total of 40 clusters using Probability  
51 147 proportional to size technique were selected randomly from the list of all available clusters  
52 148 within the defined geographical area. Each cluster was from an individual electoral ward  
53 149 within the LSGs. We selected 25 participants from each cluster. In each cluster, a random  
54 150 starting point was selected and households were visited in a sequential manner by the  
55  
56  
57  
58  
59  
60



1  
2  
3 151 principal investigator and staff till 25 subjects were recruited. A flowchart on the study  
4  
5 152 design used in the present study is shown in figure.1. The inclusion criteria were: (i)  
6  
7 153 minimum age of 65 years or more (ii) ambulant physical status (iii) intention to stay in the  
8  
9 154 study area for a minimum of one year after assessment and (iv) ability to communicate in  
10  
11 155 English/Malayalam language. The exclusion criteria included complete dependence for day-  
12  
13 156 to-day activities.

14  
15 157 **Operational definitions:**

16  
17 158 A fall was defined as suggested by The Kellogg International Working Group as mentioned  
18  
19 159 in the introduction.<sup>3</sup>

20  
21 160 A recurrent fall was defined as falling of two or more times during the follow up period of  
22  
23 161 one year.<sup>9</sup>

24  
25 162 **Patient and public involvement:** Patients and the public were not specifically involved in  
26  
27 163 the planning and execution of this study. However, they were informed of the need of the  
28  
29 164 study and quarterly follow up which was to be done telephonically.

30  
31 165 ***Technical Information:***

32  
33  
34 166 A study questionnaire was prepared after a detailed review of the literature on studies related  
35  
36 167 to falls in the elderly; however, the questionnaire was freshly prepared by us and not derived  
37  
38 168 from other studies. The study questionnaire included questions relating to the socio-  
39  
40 169 demographic profile, comorbidities, physical activity, medication use and environmental  
41  
42 170 assessment. This questionnaire was initially piloted over a small number of patients (n=50)  
43  
44 171 and the redundant questions were either removed or modified. The modified questionnaire  
45  
46 172 was reviewed by subject experts and was approved for use in the full study.

47 173 All initial assessments were done at the participant's home. The research team (PI, two  
48  
49 174 nurses) visited all the recruited subjects at their home premises. The study questionnaire was  
50  
51 175 administered by the PI by means of a face-to-face interview during house visits. In addition,  
52  
53 176 height, weight and blood pressure readings were taken by the trained staff (nurses) that  
54  
55 177 accompanied the PI. All subjects were advised to keep a fall diary in which they were  
56  
57 178 instructed to note down any incident of fall along with the date and time of the fall, what the  
58  
59 179 patient was doing when he fell, what caused the fall, whether it was a witnessed fall or not  
60

1  
2  
3 180 and whether the fall had any consequences or complications. A three monthly follow up was  
4  
5 181 done by telephonic conversation with the enrolled subjects for one year from the first visit.  
6  
7 182 Those who were not available over the phone were contacted via house visits by the research  
8  
9 183 staff and hence no missing data were encountered in the study. In addition, the fall diaries of  
10  
11 184 those who reported a fall from the same cluster were reviewed during these house visits. The  
12  
13 185 data collection period was from August 2015 to April 2017.

#### 14 186 ***Statistics:***

17 187 We summarized demographic and social-economic variables to characterize the study  
18  
19 188 population (Table 1). We presented the mean and standard deviation for normally distributed  
20  
21 189 continuous variables. All categorical variables are expressed in number and percentages. We  
22  
23 190 used Chi square test to examine the association of categorical risk factors with prospective  
24  
25 191 falls. All individual factors with a p value of <0.2 for association on bivariate analysis was  
26  
27 192 selected for multivariate analysis. Multiple binary logistic regression was used to construct  
28  
29 193 the prediction model for prospective falls. We selected Logistic regression after verifying  
30  
31 194 lack of over-dispersion using the Pearson and deviance methods. The cut-off point for  
32  
33 195 statistical significance was set at an  $\alpha$ -level of 5%. We reported the adjusted Odds Ratios  
34  
35 196 (aOR) with 95% confidence intervals. We encountered no missing data in the study.  
36  
37 197 Statistical analysis was done using IBM SPSS Statistics 20 Windows (SPSS Inc., Chicago,  
38  
39 198 USA).

#### 38 199 ***Ethical approval:***

41 200 We collected written informed consent from the consenting subjects before recruitment to the  
42  
43 201 study and the same was documented for future reference. The consent contained the title,  
44  
45 202 purpose, methods employed in the study, benefits to the subject as well as to their families. It  
46  
47 203 was also made clear that participation in this research is purely voluntary. The confidentiality  
48  
49 204 of the study during the analysis was also mentioned in the consent. The consent process and  
50  
51 205 study protocol was approved by the Institutional Ethics Committee of Amrita Institute of  
52  
53 206 Medical Sciences and Research centre. (Institutional Ethics Committee Registration Number:  
54  
55 207 ECR/129/Inst/KL/2013).

## 55 208 **Results**

### 57 209 ***Baseline Characteristics of the study population***

1  
2  
3 210 We recruited a total of 1000 participants from 40 individual pre-designated clusters spread  
4  
5 211 across a circular geographical area with the study institution as the centre point. The  
6  
7 212 distribution of gender, age categories, weight status, education level, household living pattern  
8  
9 213 and area of domicile are presented in Table 1. The mean age of the study subjects was  
10  
11 214 72.7(7.2) years. Among the study participants, 568 (56.8%) were female, 87.4% were literate  
12  
13 215 and 82% lived with family or caretakers. A total of 348 (34.8%) were either pre-obese or  
14  
15 216 obese as per Asian Criteria of BMI classification.<sup>21</sup> The morbidity profile of the study  
16  
17 217 population was published earlier.<sup>22</sup> The self-reported prevalence of diabetes(DM), coronary  
18  
19 218 artery diseases(CAD) and cerebrovascular accidents (CVA) were 34.2%, 20.1%&5.3%  
20  
21 219 respectively. Among the study subjects, 768 (76.8%) were hypertensive as documented either  
22  
23 220 by high values on house visit measurement or by current treatment for hypertension. Among  
24  
25 221 hypertensives, a total of 528 subjects (68.8%) reported taking treatment for hypertension and  
26  
27 222 remaining 240(31.2%) were newly detected during the baseline evaluation of the study.

### 26 223 ***Incidence of falls in the study population***

28  
29 224 A total of 201(20.1%) subjects reported a fall during the prospective follow up period of one  
30  
31 225 year. The total fall episodes during the follow up period were 301. The overall incidence rate  
32  
33 226 of falls was 31 (95% CI 27.7, 34.6) per 100 person years. The corresponding figures for  
34  
35 227 elderly men and women separately were 21.2 (95% CI 18.5, 24.2) and 38.3 (95% CI, 34.6,  
36  
37 228 42.3) respectively. The stratified incidence rates for age groups 65-75, 75-85 & more than 85  
38  
39 229 were 27.4, 36.8 and 41.1 per 100 person years respectively. Among the participants, more  
40  
41 230 women reported a fall compared to men (23.6% v/s 15.5%, p, 0.002). In the age stratified  
42  
43 231 groups, 27(30.0%) subjects in the age group >85 years reported a fall in the follow up period,  
44  
45 232 compared to 54(20.6%) in the age group 75-85 years and 120(18.5%) in the 65-75 years  
46  
47 233 group. (p 0.038). In addition, 53 (5.3 %) people sustained recurrent falls (two or more falls)  
48  
49 234 during the follow up.

### 48 235 ***Factors associated with prospective falls.***

50  
51 236 The association of baseline factors with a prospective history of falls during the follow up  
52  
53 237 period is presented in **Table 2** as unadjusted bivariate comparisons. Among all baseline  
54  
55 238 variables, only gender and living arrangement showed a significant association with a  
56  
57 239 prospective history of falls on bivariate comparisons. Females had a higher risk of fall when  
58  
59 240 compared to males (OR 1.68, 95% CI, 1.21, 2.33. p 0.002). Those living alone during  
60

1  
2  
3 241 daytime also had a higher risk of falls when compared to those living with family/caretaker  
4 242 (OR 2.95, 95% CI, 1.47, 5.94. p 0.002). The association of prospective falls with factors  
5 243 affecting locomotion was explored by bivariate analysis and is presented in **Table 3**. Among  
6 244 the factors affecting locomotion, only parkinsonism (OR 2.66, 95% CI, 1.23, 5.78. p 0.010),  
7 245 vertigo (OR 1.51, 95% CI, 1.10, 2.06. p 0.010), arthritis (OR 1.62, 95% CI, 1.17, 2.25. p  
8 246 0.004), numbness and paraesthesia of feet (OR 1.37, 95% CI, 1.00, 1.86. p 0.048) dependence  
9 247 in basic activities of daily living (OR 3.45, 95% CI, 2.01, 5.92. p <0.001) and dependence in  
10 248 instrumental activities of daily living (OR 1.63, 95% CI, 1.18, 2.25. p 0.003) showed  
11 249 significant associations with prospective falls on bivariate comparisons. A history of falls in  
12 250 the preceding year also had a higher risk for prospective falls (OR 2.59, 95% CI, 1.87, 3.58. p  
13 251 <0.001).

22  
23  
24 252

25 253 Furthermore, among baseline factors only gender showed an association with recurrent falls  
26 254 on bivariate comparisons (OR 2.44, 95% CI, 1.29, 4.63. p 0.005). Among factors affecting  
27 255 locomotion, dependence in basic activities of daily living (OR 5.00, 95% CI, 2.38, 10.10. p  
28 256 <0.001), dependence in instrumental activities of daily living (OR 1.79, 95% CI, 1.03, 3.12. p  
29 257 = 0.038) and a history of falls in the preceding year (OR 4.20, 95% CI, 2.38, 7.39 p <0.001)  
30 258 showed an association with recurrent falls on bivariate comparisons.

31 259

32 260 In the study population, 474(47.4%) subjects reported taking anti-hypertensives, 277(27.7%)  
33 261 reported taking anti diabetic medications and 69(6.9%) reported taking either  
34 262 benzodiazepines or other sedative drugs. There was no significant association for prospective  
35 263 falls with use of anti-hypertensive medications (OR 0.77, 95% CI 0.57, 1.06, p = 0.104), anti-  
36 264 diabetic medications (OR 1.14, 95% CI 0.81, 1.60, p=0.446) or benzodiazepines/sedatives  
37 265 (OR 1.56, 95% CI 0.90, 2.72, p=0.110) in bivariate comparisons.

### 266 ***Independent Risk Factors for prospective falls***

267 The final adjusted model with independent predictors of prospective falls in the elderly is  
268 presented as Table 4. The variables found to be significant(P value <0.2) in bivariate analysis  
269 with falls were age, sex, living arrangement, vertigo, parkinsonism, arthritis, urinary  
270 symptoms, constipation, knee pain, paraesthesia of feet, history of fall in the previous year,  
271 dependence in basic and instrumental activities of daily living, use of assistive devices for  
272 movement, cognitive impairment, depression, use of antihypertensive medications and

1  
2  
3 273 benzodiazepines. The same were included in the final model construction. Among the factors  
4  
5 274 examined in the logistic regression model, female sex (OR 1.48, 95% CI 1.05, 2.10,  $p =$   
6  
7 275 0.027), parkinsonism (OR 2.26, 95% CI 1.00, 5.05,  $p=0.048$ ), arthritis (OR 1.48, 95% CI  
8  
9 276 1.05-2.09,  $p=0.026$ ), dependence in basic activities of daily living (OR 3.49, 95% CI 2.00,  
10  
11 277 6.09,  $p<0.001$ ), not using antihypertensive medications (OR 1.53, 95% CI 1.10-2.13,  
12  
13 278  $p=0.012$ ), living alone during the daytime (OR 3.27, 95% CI 1.59-6.71,  $p=0.001$ ) and history  
14  
15 279 of falls in the previous year (OR 2.59, 95% CI 1.87, 3.58,  $p<0.001$ ) were found to be  
16  
17 280 significantly associated with falls.

18 281 The factors included to assess the independent risk factors of recurrent falls were, female sex,  
19  
20 282 vertigo, parkinsonism, arthritis and dependence in basic and instrumental activities of daily  
21  
22 283 living and history of falls in the previous year. From the above, the independent predictors for  
23  
24 284 recurrent falls were female sex (OR 2.05, 95% CI 1.07, 3.95,  $p = 0.031$ ), dependence in basic  
25  
26 285 activities of daily living (OR 3.63, 95% CI 1.71, 7.70,  $p = 0.001$ ), and history of falls in the  
27  
28 286 previous year (OR 3.39, 95% CI 1.89, 6.05,  $p<0.001$ ).

## 29 287 **Discussion**

30  
31 288 The current study provides details of fall episodes experienced by free living elderly from  
32  
33 289 Kerala, India during a prospective follow up of one year. Approximately one in five elderly  
34  
35 290 subjects in this age group reported a fall during the study period. There appears to be a sex  
36  
37 291 based difference in the proportion that fell with one in four elderly women falling compared  
38  
39 292 to one in six men during follow up. The results also suggest a dose response relationship  
40  
41 293 between age and falls with more subjects falling in older age groups compared to relatively  
42  
43 294 younger groups. In addition, every fourth person who fell reported one or more falls  
44  
45 295 following the index fall episode during the study period.

46 296 The independent predictors for falls in the elderly included female sex, parkinsonism and  
47  
48 297 related movement disorders, arthritis, dependence in basic activities of daily living, not using  
49  
50 298 antihypertensive medicines, living alone during daytime and a history of fall in the preceding  
51  
52 299 year. The corresponding predictors for recurrent falls included female sex, dependence in  
53  
54 300 basic activities of daily living and a history of fall in the preceding year. To our knowledge,  
55  
56 301 this is the only prospective cohort study done in India that focussed on falls in free living  
57  
58 302 elderly who were assessed in the community setting.

1  
2  
3 303 The incidence of falls in the elderly from our study appears to be at the lower end of the  
4 spectrum as reported by western studies (29% to 40%).<sup>9-14</sup> Interestingly, our results are more  
5 304 similar to that reported by a prospective study among community dwelling elderly Chinese  
6 subjects.<sup>23</sup> The incidence rate of falls in this study were 27.0, 32.4 and 22.0 per 100 person-  
7 305 years for all elderly, women and men respectively. The proportion with recurrent falls in this  
8 306 study was also similar to our study (4.75% v/s 5.3%).  
9 307  
10 308

11  
12  
13  
14 309 The risk factors for prospective falls in community dwelling elderly was examined by a  
15 recent meta-analysis by Deandrea et al that pooled 74 prospective cohorts.<sup>19</sup> Most of the  
16 310 prospective studies in the meta-analysis suggested that community dwelling elderly women  
17 311 are at higher risk for falls compared to their male counterparts. The pooled estimates for falls  
18 312 (OR 1.30, 95% CI, 1.18, 1.42) and recurrent falls (OR 1.34, 95% CI, 1.12, 1.60) in this meta-  
19 313 analysis are in agreement with the current study.  
20 314

21  
22  
23  
24  
25 315 Similar to the current study, several prospective studies have reported higher risk for falls  
26 316 among elderly patients with Parkinsonism and/or related movement disorders similar to the  
27 317 current study. The meta-analysis suggested an adjusted OR of 2.71 (95% CI, 1.08, 6.84) for  
28 318 falls and 2.84 (95% CI, 1.77, 4.58) for recurrent falls from five studies that looked for the  
29 319 same. Our study didn't report any positive association between Parkinson's disease and  
30 320 recurrent falls, probably due to the small number of recurrent fallers (5.3%) in the cohort.  
31  
32  
33  
34  
35  
36

37 321 Our finding of high risk for falls among those elderly with arthritis is in concordance with  
38 322 several other studies.<sup>24-27</sup> Together these studies suggest that the elderly with arthritis and/or  
39 323 chronic pain have a higher risk for falls. The GLOW cohort also reported a higher incidence  
40 324 of falls and fractures in postmenopausal women with osteoarthritis compared to osteoarthritis  
41 325 free peers.<sup>27</sup>  
42  
43  
44  
45  
46  
47

48 327 Several studies have reported that living alone during the daytime is a risk factor for falls in  
49 328 the elderly as suggested by the current study.<sup>19</sup> The meta-analysis is also in agreement with  
50 329 this observation (OR 1.33, 95% CI, 1.21, 1.45) after looking at data from 11 studies that  
51 330 examined the same.  
52  
53  
54  
55

56 331 Reduced capability for BADL( Basic Activities of Daily Living) is also reported to be  
57 332 associated with falls in the elderly.<sup>28</sup> Yokoya et al recently concluded that higher frequency  
58  
59  
60

1  
2  
3 333 of leaving home, higher exercise levels and presence of interest in activities (e.g., meeting  
4 334 friends, shopping, working in the garden) were associated with a reduced risk for fall in  
5 335 community dwelling elders.<sup>28</sup> Therefore, maintaining and enhancing physical functions,  
6 336 principally walking ability and walking speed are critical for fall prevention among the  
7 337 elderly.<sup>29,30</sup> Age appropriate exercises including those enhancing muscle strength and  
8 338 improving balance can probably reduce the incidence of falls among the elderly.<sup>30</sup>

13  
14 339 A history of falls in the previous year appears to be the most consistent risk factor across  
15 340 several studies.<sup>19,30,31</sup> Pooled data from several studies in the recent meta-analysis puts the  
16 341 risk at an OR of 2.77 (95% CI, 2.37, 3.25) for falls and an OR of 3.46 (95%CI, 2.85, 4.22) for  
17 342 recurrent falls, in agreement with the current study (2.59 & 3.39 respectively).<sup>19</sup> Suzuki et al  
18 343 reported that five out of six elderly with a history of falls were anxious about another fall and  
19 344 one in three said that they did not venture out again due to fear of another fall.<sup>30</sup>

23  
24 345 One notable finding in our study was the lack of association for falls with medication use for  
25 346 most groups of medications except for antihypertensive medications. This is in contrast to a  
26 347 meta-analysis of the impact of medication classes on falls in elderly.<sup>32</sup> Woolcott et al reported  
27 348 an OR of 1.41 (95% CI, 1.20-1.71) for falls among elderly with benzodiazepine use.<sup>32</sup> The  
28 349 lack of association between sedatives use and falls in our study is probably due to the limited  
29 350 number of subjects reporting the use of the same (6.9%). We saw an inverse association  
30 351 between falls and the use of antihypertensive drug use in the current study. One probable  
31 352 reason could be the high proportion of uncontrolled hypertensives in the study population.  
32 353 This finding needs to be explored further in future studies.

33 354 Several studies have earlier suggested that the prevalence of falls in low and middle income  
34 355 countries is higher than that reported from high income countries.<sup>4-6</sup> The morbidity from falls  
35 356 and related events too appear to be higher in low and middle income countries compared to  
36 357 high income countries like the US.<sup>4-6</sup> There appears to be low awareness about the  
37 358 consequences of falls in low and middle income countries. This could probably be due to the  
38 359 lack of data regarding falls reported from these regions. It is expected that the awareness  
39 360 related to falls will improve with dissemination of data from the current study as well as  
40 361 similar studies from this region. The same may also stimulate research into the interventional  
41 362 options to reduce fall related mortality and morbidity. Interventional studies to prevent falls  
42 363 in the elderly are very relevant to the state of Kerala as it has the maximum proportion of

1  
2  
3 364 elderly (12.6%) in India as per 2011 census.<sup>33</sup> This is much higher than the national average  
4  
5 365 of 8.6%, making Kerala more appropriate for future intervention studies in this area.  
6  
7

8 366 The strengths of the current study include the following; prospective cohort study design,  
9  
10 367 large sample size (n=1000), representative urban and rural population components, inclusion  
11  
12 368 of participants from different socioeconomic levels, no participants lost to follow up and use  
13  
14 369 of a fall diary to avoid recall bias. However, the study included participants from a limited  
15  
16 370 geographical setting and was able to follow up only for a short period (one year), and hence  
17  
18 371 the generalisation of the study findings is limited.  
19

## 372 373 **Conclusion**

20 374  
21  
22 375 One in five community dwelling elderly citizens fall on an annual basis and one in four of  
23  
24 376 those who fall are prone to fall again in the same calendar year. Female sex, movement  
25  
26 377 disorders including parkinsonism, arthritis, dependence in basic activities of daily living,  
27  
28 378 living alone during daytime and a history of falls in the previous year appear to predict a fall  
29  
30 379 in the following year.  
31

32 380  
33 381 Any future intervention program targeting a reduction in falls among the elderly in India  
34  
35 382 should start in Kerala due to the high proportion of elderly in the state and extend to similar  
36  
37 383 states later. Such studies should focus on the modifiable risk factors such as living alone at  
38  
39 384 home during daytime, movement disorders and arthritis as identified by the current study. We  
40  
41 385 need to encourage mechanisms that may reduce dependence of the elderly for basic activities  
42  
43 386 of daily living. Attention should also be given to encourage both physical and social activities  
44  
45 387 among elderly subjects.  
46

47 388  
48 389 **Competing Interests:** The authors have no competing interests.  
49

## 50 390 51 391 **Funding:**

52 392 This research received no specific grant from any funding agency in the public, commercial  
53  
54 393 or not-for-profit sectors.  
55

## 56 394 57 395 **References:**

58 396  
59 397 1. United Nations, Department of Economic and Social Affairs, Population Division (2017). World Population  
60 398 Prospects: The 2017 Revision, Key Findings and Advance Tables. Working Paper No. ESA/P/WP/248., n.d.



- 1  
2  
3 399 2. Rubenstein LZ. Falls in older people: epidemiology, risk factors and strategies for prevention. *Age Ageing*.  
4 400 2006 Sep;35 Suppl 2:ii37-ii41.
- 5 401 3. Gibson MJ, Andres RO, Isaacs B, Radebaugh T, Worm-Petersen J. The prevention of falls in later life. A  
6 402 report of the Kellogg International Work Group on the prevention of falls by the elderly. *Danish Medical*  
7 403 *Bulletin* 1987;34(Suppl 4):1-24.
- 8 404 4. WHO fact sheet <https://www.who.int/news-room/fact-sheets/detail/falls>
- 9  
10 405 5. Institute for Health Metrics and Evaluation: GBD Compare. [http:// www.healthmetricsandevaluation.org/gbd](http://www.healthmetricsandevaluation.org/gbd).  
11 406 Accessed 25 May 2015.
- 12 407  
13 408 6. Murray CJL, Vos T, Lozano R, Naghavi M, Flaxman AD, Michaud C, et al. Disability-adjusted life years  
14 409 (DALYs) for 291 diseases and injuries in 21 regions, 1990–2010: a systematic analysis for the Global Burden of  
15 410 Disease Study 2010. *Lancet*. 2012;380:2198–227.
- 16 411  
17 412 7. Heather Hestekin et al., “Measuring Prevalence and Risk Factors for Fall Related Injury in Older Adult in  
18 413 Low Middle Income Countries, Results from the WHO Study on Global AGEing and Adult Health,” July 2013,  
19 414 06.
- 20 415  
21  
22 416 8. Beard JR, Biggs S, Bloom DE, Fried LP, Hogan P, Kalache A, et al. Global population ageing: peril or  
23 417 promise? Geneva: World Economic Forum; 2012. p. 148.
- 24 418  
25  
26 419 9. Lord SR, Sherrington C, Menz HB. Falls in Older People: Risk Factors and Strategies for Prevention. 2nd ed.  
27 420 Cambridge, MA: Cambridge University Press; 2007.
- 28  
29 421 10. Tinetti ME, Speechley M, Ginter SF. Risk factors for falls among elderly persons living in the community.  
30 422 *N Engl J Med*. 1988 Dec 29;319(26):1701-7.
- 31 423 11. O’Loughlin JL, Robitaille Y, Boivin JF, Suissa S. Incidence of and risk factors for falls and injurious falls  
32 424 among the community-dwelling elderly. *Am J Epidemiol*. 1993 Feb 1;137(3):342-54.
- 33 425 12. Lord SR, Ward JA, Williams P, Anstey KJ. An epidemiological study of falls in older community-dwelling  
34 426 women: the Randwick falls and fractures study. *Aust J Public Health*. 1993 Sep;17(3):240-5.
- 35 427 13. Campbell AJ, Borrie MJ, Spears GF. Risk factors for falls in a community-based prospective study of  
36 428 people 70 years and older. *J Gerontol*. 1989 Jul;44(4):M112-7.
- 37 429 14. Luukinen H, Koski K, Laippala P, Kivelä SL. Predictors for recurrent falls among the home-dwelling  
38 430 elderly. *Scand J Prim Health Care*. 1995 Dec;13(4):294-9.
- 39 431 15. Aniket Sirohi1, Ravneet Kaur, Anil Kumar Goswami, Kalaivani Mani, Baridalyne Nongkynrih, Sanjeev  
40 432 Kumar Gupta, “A Study of Falls among Elderly Persons in a Rural Area of Haryana,” *Indian Journal of Public*  
41 433 *Health* 61, no. 2 (2017): 99–104, [https://doi.org/10.4103/ijph.IJPH\\_102\\_16](https://doi.org/10.4103/ijph.IJPH_102_16).
- 42 434 16. Dr. B. Krishnaswamy, Dr. Gnanasambandam Usha, “FALLS IN OLDER PEOPLE NATIONAL /  
43 435 REGIONAL REVIEW INDIA,” n.d., <http://www.who.int/ageing/projects/SEARO.pdf>.
- 44 436 17. Dr Anku Moni Saikia , Dr Ashok Kumar Das, Ms Anjana Moyee Saikia, “Prevalence and Correlates of Falls  
45 437 among Community-Dwelling Elderly of Guwahati City, Assam,” *Indian Journal of Basic and Applied Medical*  
46 438 *Research*; 5, no. 2 (March 2016): 185–90.
- 47 439 18. Pawan Kumar Sharma, Clare Bunker, Tushar Singh, Enakshi Ganguly, P sudhakar Reddy, Anne B Newman  
48 440 et al., “Burden and Correlates of Falls among Rural Elders of South India: Mobility and Independent Living in  
49 441 Elders Study,” *Current Gerontology and Geriatrics Research* 2017 (2017): 1–8,  
50 442 <https://doi.org/10.1155/2017/1290936>.
- 51 443 19. Deandrea S, Lucenteforte E, Bravi F, Foschi R, La Vecchia C, Negri E. Risk factors for falls in community-  
52 444 dwelling older people: a systematic review and meta-analysis. *Epidemiology*. 2010 Sep;21(5):658-68.
- 53 445 20. Kathryn Mitchell-Fearon et al., “Falls Among Community-Dwelling Older Adults in Jamaica,” *SAGE Open*  
54 446 4, no. 4 (December 18, 2014): 215824401456435, <https://doi.org/10.1177/2158244014564351>.
- 55  
56  
57  
58  
59  
60

- 1  
2  
3 447 21. “Appropriate Body-Mass Index for Asian Populations and Its Implications for Policy and Intervention  
4 448 Strategies,” *The Lancet* 363, no. 9403 (January 2004): 157–63, [https://doi.org/10.1016/S0140-6736\(03\)15268-3](https://doi.org/10.1016/S0140-6736(03)15268-3).  
5 449
- 6 450 22. Divyamol K Sasidharan, Lalu J S, Vijayakumar P et al. “Morbidity Pattern Among The Geriatric Population  
7 451 In South India: An Observational Study,” *Epidemiology International* 03, no. 01 (April 2, 2018): 11–17,  
8 452 <https://doi.org/10.24321/2455.7048.201803>  
9 453
- 10 454 23. Chu LW, Chi I, Chiu AY. Incidence and predictors of falls in the Chinese elderly. *Ann Acad Med*  
11 455 *Singapore*. 2005 Jan;34(1):60-72.
- 12 456 24. Suzanne G. Leveille, “Chronic Musculoskeletal Pain and the Occurrence of Falls in an Older Population,”  
13 457 *JAMA* 302, no. 20 (November 25, 2009): 2214, <https://doi.org/10.1001/jama.2009.1738>.
- 14 458 25. Adam L. Doré et al., “Lower-Extremity Osteoarthritis and the Risk of Falls in a Community-Based  
15 459 Longitudinal Study of Adults with and without Osteoarthritis,” *Arthritis Care & Research* 67, no. 5 (May 2015):  
16 460 633–39, <https://doi.org/10.1002/acr.22499>.
- 17 461 26. Keith D. Hill et al., “Balance and Falls Risk in Women with Lower Limb Osteoarthritis or Rheumatoid  
18 462 Arthritis,” *Journal of Clinical Gerontology and Geriatrics* 4, no. 1 (March 2013): 22–28,  
19 463 <https://doi.org/10.1016/j.jcgg.2012.10.003>.
- 20 464 27. Daniel Prieto-Alhambra et al., “An Increased Rate of Falling Leads to a Rise in Fracture Risk in  
21 465 Postmenopausal Women with Self-Reported Osteoarthritis: A Prospective Multinational Cohort Study  
22 466 (GLOW),” *Annals of the Rheumatic Diseases* 72, no. 6 (June 2013): 911–17, <https://doi.org/10.1136/annrhumdis-2012-201451>.  
23 467
- 24 468 28. Yokoya T, Demura S, Sato S. Relationships between physical activity, ADL capability and fall risk in  
25 469 community-dwelling Japanese elderly population. *Environ Health Prev Med*. 2007 Jan;12(1):25-32.
- 26 470 29. Maki BE. Selection of perturbation parameters for identification of the posture-control system. *Med Biol*  
27 471 *Eng Comput*. 1986 Nov;24(6):561-8.
- 28 472 30. Suzuki T. [Epidemiology and implications of falling among the elderly]. *Nihon Ronen Igakkai Zasshi*. 2003  
29 473 Mar;40(2):85-94. Review. Article in Japanese.
- 30 474 31. Nevitt MC, Cummings SR, Kidd S, Black D. Risk factors for recurrent nonsyncopal falls. A prospective  
31 475 study. *JAMA*. 1989 May 12;261(18):2663-8.
- 32 476 32. Woolcott JC, Richardson KJ, Wiens MO, Patel B, Marin J, Khan KM, Marra CA. Meta-analysis of the  
33 477 impact of 9 medication classes on falls in elderly persons. *Arch Intern Med*. 2009 Nov 23;169(21):1952-60.
- 34 478 33. Census of India 2011, Chapter 2, [http://censusindia.gov.in/vital\\_statistics/SRS\\_Report/9Chap%20%20-%202011.pdf](http://censusindia.gov.in/vital_statistics/SRS_Report/9Chap%20%20-%202011.pdf)  
35 479  
36 480  
37 481  
38 482  
39 483  
40 484  
41 485  
42 486  
43 487  
44 488

## Tables

Table 1. Baseline Details of the study population.

| Demographic factors | n (%)  |           |
|---------------------|--------|-----------|
| Gender              | Male   | 432(43.2) |
|                     | Female | 568(56.8) |
| Age group           |        |           |

|                           |                                |            |
|---------------------------|--------------------------------|------------|
|                           | 65-75                          | 648(64.8)  |
|                           | 75-85                          | 262(26.2)  |
|                           | >85                            | 90(9.0)    |
| <b>Weight Status(BMI)</b> |                                |            |
|                           | Underweight(<18.5)             | 124(12.4)  |
|                           | Normal(18.5-22.9)              | 340(34.0)  |
|                           | Overweight(23-24.9)            | 188(18.8)  |
|                           | Pre Obese(25-29.9)             | 264(26.4)  |
|                           | Obese(>30)                     | 84(8.4)    |
| <b>Education</b>          |                                |            |
|                           | Graduate and above             | 132(13.2)  |
|                           | Diploma / Pre-degree           | 85(8.5)    |
|                           | Middle class / Primary         | 657(65.7)  |
|                           | Illiterate                     | 126(12.6)  |
| <b>House Hold</b>         |                                |            |
|                           | Living with family / caretaker | 820 (82.0) |
|                           | Living alone during daytime    | 145 (14.5) |
|                           | Living alone                   | 35 (3.5)   |
| <b>Domicile</b>           |                                |            |
|                           | Urban                          | 700(70.0)  |
|                           | Rural                          | 300(30.0)  |

489

490

491

492

493

494

495

496

497

498

499

500

**Table.2. Association of falls with baseline variables – bivariate comparisons**

| Risk factors             | Prospective falls |               | OR (95% CI)     | P value |
|--------------------------|-------------------|---------------|-----------------|---------|
|                          | No Fall<br>n (%)  | Fall<br>n (%) |                 |         |
| <b>Gender</b>            |                   |               |                 |         |
| Men <b>[432(43.2)]</b>   | 365(84.5)         | 67(15.5)      | 1.68(1.21-2.33) | 0.002   |
| Women <b>[568(56.8)]</b> | 434(76.4)         | 134(23.6)     |                 |         |

|                                            |  |           |           |                   |       |
|--------------------------------------------|--|-----------|-----------|-------------------|-------|
| <b>Age Group in years</b>                  |  |           |           |                   |       |
| 65-75 [648(64.8)]                          |  | 528(81.5) | 120(18.5) |                   |       |
| 75-85 [262(26.2)]                          |  | 208(79.4) | 54(20.6)  | 1.14 (0.80-1.64)  | 0.468 |
| >85 [90(9.0)]                              |  | 63(70.0)  | 27(30.0)  | 1.89 (1.15 -3.09) | 0.012 |
| <b>Diabetes [342(34.2)]</b>                |  |           |           |                   |       |
| No                                         |  | 532(80.9) | 126(19.1) | 1.19(0.86-1.63)   | 0.298 |
| Yes                                        |  | 267(78.1) | 75(21.9)  |                   |       |
| <b>Hypertension (768(76.8))</b>            |  |           |           |                   |       |
| No                                         |  | 181(78.0) | 51(22.0)  | 0.86(0.60-1.23)   | 0.414 |
| Yes                                        |  | 618(80.5) | 150(19.5) |                   |       |
| <b>Asthma or COPD (225(22.5))</b>          |  |           |           |                   |       |
| No                                         |  | 622(80.3) | 153(19.7) | 1.10(0.77-1.59)   | 0.600 |
| Yes                                        |  | 177(78.7) | 48(21.3)  |                   |       |
| <b>Coronary Artery Disease (201(20.1))</b> |  |           |           |                   |       |
| No                                         |  | 639(80.0) | 160(20.0) | 1.02(0.69-1.50)   | 0.906 |
| Yes                                        |  | 160(79.6) | 41(20.4)  |                   |       |
| <b>Cerebrovascular Disease (53(5.3))</b>   |  |           |           |                   |       |
| No                                         |  | 762(80.5) | 185(19.5) | 1.78(0.97-3.27)   | 0.060 |
| Yes                                        |  | 37(69.8)  | 16(30.2)  |                   |       |
| <b>Alcohol (177(17.7))</b>                 |  |           |           |                   |       |
| No                                         |  | 654(79.5) | 169(20.5) | 0.85(0.56-1.30)   | 0.460 |
| Yes                                        |  | 145(81.9) | 32(18.1)  |                   |       |
| <b>Smoking (178(17.8))</b>                 |  |           |           |                   |       |
| No                                         |  | 652(79.3) | 170(20.7) | 0.81(0.53-1.23)   | 0.324 |
| Yes                                        |  | 147(82.6) | 31(17.4)  |                   |       |
| <b>Living Arrangement</b>                  |  |           |           |                   |       |
| Living with family/caretaker (820(82))     |  | 669(81.6) | 151(18.4) |                   |       |
| Living alone during daytime (145(14.5))    |  | 109(75.2) | 36(24.8)  | 2.95(1.47-5.94)   | 0.002 |
| Living alone(35(3.5))                      |  | 21(60.0)  | 14(40.0)  | 1.46(0.97-2.22)   | 0.073 |

501

502

503

504

505

506 **Table 3. Association of falls with factors affecting locomotion – Bivariate comparisons**

| Risk factors                 | Prospective falls   |                  | OR (95% CI)      | P value |
|------------------------------|---------------------|------------------|------------------|---------|
|                              | No Fallers<br>n (%) | Fallers<br>n (%) |                  |         |
| <b>Parkinsonism(28(2.8))</b> |                     |                  |                  |         |
| No                           | 782(80.5)           | 190(19.5)        | 2.663(1.23-5.78) | 0.010   |
| Yes                          | 17(60.7)            | 11(39.3)         |                  |         |

|                                                                               |     |           |           |                    |        |
|-------------------------------------------------------------------------------|-----|-----------|-----------|--------------------|--------|
| <b>Vertigo(388(38.8))</b>                                                     | No  | 505(82.5) | 107(17.5) | 1.51(1.10-2.06)    | 0.010  |
|                                                                               | Yes | 294(75.8) | 94(24.2)  |                    |        |
| <b>Arthritis(281(28.1))</b>                                                   | No  | 591(82.2) | 128(17.8) | 1.62(1.17-2.25)    | 0.004  |
|                                                                               | Yes | 208(74.0) | 73(26.0)  |                    |        |
| <b>Knee pain (565(56.5))</b>                                                  | No  | 356(81.8) | 79(18.2)  | 1.24(0.91-1.70)    | 0.179  |
|                                                                               | Yes | 443(78.4) | 122(21.6) |                    |        |
| <b>Numbness and paraesthesia of feet(475(47.5))</b>                           | No  | 432(82.3) | 93(17.7)  | 1.37(1.00-1.86)    | 0.048  |
|                                                                               | Yes | 367(77.3) | 108(22.7) |                    |        |
| <b>Urinary symptoms (316(31.6))</b>                                           | No  | 558(81.6) | 126(18.4) | 1.38(0.99-1.90)    | 0.051  |
|                                                                               | Yes | 241(76.3) | 75(23.7)  |                    |        |
| <b>Visual impairment (594(59.4))</b>                                          | No  | 326(80.3) | 80(19.7)  | 1.04(0.76-1.43)    | 0.796  |
|                                                                               | Yes | 473(79.6) | 121(20.4) |                    |        |
| <b>Not independent in Basic Activities of daily living (59(5.9))</b>          | Yes | 766(81.4) | 175(18.6) | 3.45(2.01-5.92)    | <0.001 |
|                                                                               | No  | 33(55.9)  | 26(44.1)  |                    |        |
| <b>Not independent in Instrumental activities of daily living (306(30.6))</b> | Yes | 572(82.4) | 122(17.6) | 1.63(1.18-2.25)    | 0.003  |
|                                                                               | No  | 227(74.2) | 79(25.8)  |                    |        |
| <b>Regular exercise or Yoga (342(34.2))</b>                                   | Yes | 281(82.2) | 61(17.8)  | 1.25(0.89-1.74)    | 0.198  |
|                                                                               | No  | 518(78.7) | 140(21.3) |                    |        |
| <b>History of falls in the previous 1 year (269(26.9))</b>                    | Yes | 182(67.7) | 87(32.3)  | 2.59 (1.87 – 3.58) | <0.001 |
|                                                                               | No  | 617(84.4) | 114(15.6) |                    |        |

507

508

509

510 **Table 4 Adjusted model for risk factors of falls in community dwelling elderly**511 **subjects(n=1000)**

| Risk Factors | Odds Ratio (95% CI) | P value |
|--------------|---------------------|---------|
| All Falls    |                     |         |

|                                                |                   |        |
|------------------------------------------------|-------------------|--------|
| Females                                        | 1.48 (1.05, 2.10) | 0.027  |
| Movement disorders / Parkinson's Disease       | 2.26 (1.00, 5.05) | 0.048  |
| Arthritis                                      | 1.48 (1.05, 2.09) | 0.026  |
| Dependence in basic activities of daily living | 3.49 (2.00, 6.09) | <0.001 |
| Not using antihypertensive medications         | 1.53 (1.10, 2.13) | 0.012  |
| Living alone during daytime                    | 3.27 (1.59, 6.71) | 0.001  |
| History of falls in the previous year          | 2.25 (1.60, 3.15) | <0.001 |
| <b>Recurrent Falls</b>                         |                   |        |
| Females                                        | 2.05 (1.07, 3.95) | 0.031  |
| Dependence in basic activities of daily living | 3.63 (1.71, 7.70) | 0.001  |
| History of falls in previous year              | 3.39 (1.89, 6.05) | <0.001 |

### Figure legends

Fig.1 Flowchart of the study design

### **Contributorship statement** :-

Divyamol K S and Priya Vijayakumar conceptualised the original idea. Divyamol K S and Manu Raj did review of literature and planned, conducted analysed and prepared manuscript of the research work. Priya Vijayakumar supervised the experiment and the final editing of the article. Sumi Soman and Libin Antony were involved in data acquisition and analysis. Abish Sudhakar and Conrad Kabali derived the models and analysed the data.

### **Data availability statement** :-

All data relevant to the study are included in the article or uploaded as supplementary information.

1  
2  
3  
4  
5  
6  
7  
8  
9  
10  
11  
12  
13  
14  
15  
16  
17  
18  
19  
20  
21  
22  
23  
24  
25  
26  
27  
28  
29  
30  
31  
32  
33  
34  
35  
36  
37  
38  
39  
40  
41  
42  
43  
44  
45  
46  
47  
48  
49  
50  
51  
52  
53  
54  
55  
56  
57  
58  
59  
60

536  
537

For peer review only

## Figure

**Fig.1 Flowchart of the Study Design**





1 STROBE Statement—Checklist of items that should be included in reports of *cohort studies*

|    |                                                                     | <b>Recommendation</b>                                                                                                                                                                                | <b>Action taken</b>                                                                      |
|----|---------------------------------------------------------------------|------------------------------------------------------------------------------------------------------------------------------------------------------------------------------------------------------|------------------------------------------------------------------------------------------|
| 4  | <b>Title and abstract</b>                                           | 1 (a) Indicate the study's design with a commonly used term in the title or the abstract                                                                                                             | Page 2, Line 50 & 51                                                                     |
| 6  |                                                                     | (b) Provide in the abstract an informative and balanced summary of what was done and what was found                                                                                                  | Page 2-3, Line 53-73                                                                     |
| 9  | <b>Introduction</b>                                                 |                                                                                                                                                                                                      |                                                                                          |
| 11 | Background/rationale                                                | 2 Explain the scientific background and rationale for the investigation being reported                                                                                                               | Page 4, Line 86-103                                                                      |
| 13 | Objectives                                                          | 3 State specific objectives, including any prespecified hypotheses                                                                                                                                   | Page 5, Line 120-123                                                                     |
| 16 | <b>Methods</b>                                                      |                                                                                                                                                                                                      |                                                                                          |
| 17 | Study design                                                        | 4 Present key elements of study design early in the paper                                                                                                                                            | Page 5, Line 127                                                                         |
| 18 | Setting                                                             | 5 Describe the setting, locations, and relevant dates, including periods of recruitment, exposure, follow-up, and data collection                                                                    | Page 5, Line 128-132                                                                     |
| 22 | Participants                                                        | 6 (a) Give the eligibility criteria, and the sources and methods of selection of participants. Describe methods of follow-up                                                                         | Page 5-6, Line 141-153                                                                   |
| 26 |                                                                     | (b) For matched studies, give matching criteria and number of exposed and unexposed                                                                                                                  | Not Applicable                                                                           |
| 28 | Variables                                                           | 7 Clearly define all outcomes, exposures, predictors, potential confounders, and effect modifiers. Give diagnostic criteria, if applicable                                                           | Page 6, Line 154-158                                                                     |
| 32 | Data sources/measurement                                            | 8* For each variable of interest, give sources of data and details of methods of assessment (measurement). Describe comparability of assessment methods if there is more than one group              | Page 6-7, Line 163-181                                                                   |
| 37 | Bias                                                                | 9 Describe any efforts to address potential sources of bias                                                                                                                                          | Page 6-7, Line 173-176, 177-179                                                          |
| 40 | Study size                                                          | 10 Explain how the study size was arrived at                                                                                                                                                         | Page 5, Line 133- 140                                                                    |
| 41 | Quantitative variables                                              | 11 Explain how quantitative variables were handled in the analyses. If applicable, describe which groupings were chosen and why                                                                      | Page 7, Line 183-194                                                                     |
| 45 |                                                                     | Statistical methods                                                                                                                                                                                  | 12 (a) Describe all statistical methods, including those used to control for confounding |
| 47 | (b) Describe any methods used to examine subgroups and interactions |                                                                                                                                                                                                      | Not done                                                                                 |
| 49 | (c) Explain how missing data were addressed                         |                                                                                                                                                                                                      | No missing data was encountered                                                          |
| 51 | (d) If applicable, explain how loss to follow-up was addressed      |                                                                                                                                                                                                      | No Loss to follow up was reported                                                        |
| 53 | (e) Describe any sensitivity analyses                               |                                                                                                                                                                                                      | Not Applicable                                                                           |
| 55 | <b>Results</b>                                                      |                                                                                                                                                                                                      |                                                                                          |
| 57 | Participants                                                        | 13 (a) Report numbers of individuals at each stage of study—eg numbers potentially eligible, examined for eligibility, confirmed eligible, included in the study, completing follow-up, and analysed | Page 8, Line 206-208<br>Refer Fig 1                                                      |
| 59 |                                                                     | (b) Give reasons for non-participation at each stage                                                                                                                                                 | Not Applicable                                                                           |

|                          |    |                                                                                                                                                                                                              |                          |
|--------------------------|----|--------------------------------------------------------------------------------------------------------------------------------------------------------------------------------------------------------------|--------------------------|
|                          |    | (c) Consider use of a flow diagram                                                                                                                                                                           | Figure 1                 |
| Descriptive data         | 14 | (a) Give characteristics of study participants (eg demographic, clinical, social) and information on exposures and potential confounders                                                                     | Page 8, Line 207-219     |
|                          | *  | (b) Indicate number of participants with missing data for each variable of interest                                                                                                                          | No missing data          |
|                          |    | (c) Summarise follow-up time (eg, average and total amount)                                                                                                                                                  | Page 6-7, Line 176-177   |
| Outcome data             | 15 | Report numbers of outcome events or summary measures over time                                                                                                                                               | Page 8, Line 221-231     |
| Main results             | 16 | (a) Give unadjusted estimates and, if applicable, confounder-adjusted estimates and their precision (eg, 95% confidence interval). Make clear which confounders were adjusted for and why they were included | Page 8-9, Line 232-262   |
|                          |    | (b) Report category boundaries when continuous variables were categorized                                                                                                                                    | Not applicable           |
|                          |    | (c) If relevant, consider translating estimates of relative risk into absolute risk for a meaningful time period                                                                                             | Not applicable           |
| Other analyses           | 17 | Report other analyses done—eg analyses of subgroups and interactions, and sensitivity analyses                                                                                                               | Page 09, Line 263-283    |
| <b>Discussion</b>        |    |                                                                                                                                                                                                              |                          |
| Key results              | 18 | Summarise key results with reference to study objectives                                                                                                                                                     | Page 10, Line 286-292    |
| Limitations              | 19 | Discuss limitations of the study, taking into account sources of potential bias or imprecision. Discuss both direction and magnitude of any potential bias                                                   | Page 13, Line 363-365    |
| Interpretation           | 20 | Give a cautious overall interpretation of results considering objectives, limitations, multiplicity of analyses, results from similar studies, and other relevant evidence                                   | Page 11-12, Line 300-359 |
| Generalisability         | 21 | Discuss the generalisability (external validity) of the study results                                                                                                                                        | Page 13, Line 363-365    |
| <b>Other information</b> |    |                                                                                                                                                                                                              |                          |
| Funding                  | 22 | Give the source of funding and the role of the funders for the present study and, if applicable, for the original study on which the present article is based                                                | Page 13, Line 369-370    |
